# Supplementary material for: Synthesis of 2-ethoxycarbonylthieno[2,3-b]quinolines in biomass-derived solvent γ-valerolactone and their biological evaluation against protein tyrosine phosphatase 1B
Source: Royal Society of Chemistry journal article supplement (doi:10.1039/d0ra09247a), 2021-01-01

# Synthesis of 2-(6-hydroxy-carbonyl-hexyl-10,11-b)quinolines in biomass-derived solvent $\gamma$ -valerolactone and their biological evaluation against protein tyrosine phosphatase 1B

Xu-Yang Mu<sup>a, #</sup>, Zhi-Jia Wang<sup>a, #</sup>, Bo Feng<sup>a, #</sup>, Lei Xu<sup>b</sup>, Li-Xin Gao<sup>b</sup>, Rajendran Satheeshkumar<sup>a</sup>,  
Jia Li<sup>b</sup>, Yu-Bo Zhou<sup>b, \*</sup>, Wen-Long Wang<sup>a, \*</sup>

<sup>a</sup>School of Pharmaceutical Sciences, Jiangnan University, Wuxi, 214122, China.

<sup>b</sup>State key Laboratory of Drug Research, Shanghai Institute of Materia Medica, Chinese Academy of Sciences, Shanghai, 201203, China.

|                                                                                     |            |
|-------------------------------------------------------------------------------------|------------|
| <b>I. General Experimental Information .....</b>                                    | <b>P2</b>  |
| <b>II. Preparation of Compounds 6a-6n .....</b>                                     | <b>P2</b>  |
| <b>IV. PTP1B and Related PTPs Biological Assay .....</b>                            | <b>P8</b>  |
| <b>V. References.....</b>                                                           | <b>P9</b>  |
| <b>VI. <sup>1</sup>H and <sup>13</sup>C NMR Data and ESI Mass spectra Data.....</b> | <b>P10</b> |

All chemicals were reagent grade and used as purchased.  $^1\text{H}$  (400 MHz) NMR spectra were recorded on a Bruker AVIII 400 MHz spectrometer and a Varian MR-400 spectrometer. The chemical shifts were reported in (ppm) using the 7.26 signal of  $\text{CDCl}_3$  ( $^1\text{H}$ -NMR) as internal standards and the 77.00 signal of  $\text{CDCl}_3$  ( $^{13}\text{C}$ -NMR) as internal standards. ESI Mass spectra (MS) was obtained on a Waters ACQUITY TQD Mass Spectrometer. Compounds **4a-4n** are synthesized as reference<sup>1</sup>

## II. Preparation of Compounds **6a-6n**

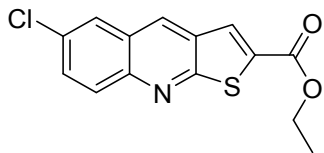

### *Ethyl 6-chlorothieno[2,3-b]quinoline-2-carboxylate (6a)*

The compound **4a** (678.3 mg, 3 mmol) was dissolved in GVL (6 mL) followed by addition of triethylamine (2.5 mL, 18 mmol) and ethyl mercaptoacetate (395  $\mu\text{L}$ , 3.6 mmol) consequently. The mixture was heated to 90  $^\circ\text{C}$  and stirred at that temperature for 1 h. After the reaction finished, the mixture was dropped into ice water (10 mL). The precipitate was isolated by filtration, washed with ethanol (10 mL) and cold water (2 mL) successively, and dried to afford the white solid **6a** (717.3 mg, 82%).

$^1\text{H}$  NMR (400 MHz,  $\text{CDCl}_3$ )  $\delta$ : 8.58 (s, 1H), 8.11 – 8.09 (m, 2H), 7.97 (d,  $J = 2.4$  Hz, 1H), 7.72 (dd,  $J = 9.2$ , 2.4 Hz, 1H), 4.46 (q,  $J = 7.2$  Hz, 2H), 1.45 (t,  $J = 7.2$  Hz, 3H);  $^{13}\text{C}$  NMR (100 MHz,  $\text{CDCl}_3$ )  $\delta$ : 163.64, 162.16, 146.27, 135.95, 131.81, 131.66, 131.53, 131.45, 130.04, 127.42, 126.89, 126.12, 62.17, 14.28; MS (ESI):  $m/z$  calcd. For  $\text{C}_{14}\text{H}_{11}\text{ClNO}_2\text{S}$   $[\text{M}+\text{H}]^+$  292.0/294.0, found 292.0/294.0.

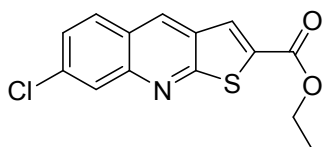

### *Ethyl 7-chlorothieno[2,3-b]quinoline-2-carboxylate (6b)*

The compound **4b** (678.3 mg, 3 mmol) was dissolved in GVL (6 mL) followed by addition of triethylamine (2.5 mL, 18 mmol) and ethyl mercaptoacetate (395  $\mu\text{L}$ , 3.6 mmol) consequently. The mixture was heated to 90  $^\circ\text{C}$  and stirred at that temperature for 1 h. After the reaction finished, the mixture was dropped into ice water (10 mL). The precipitate was isolated by filtration, washed with ethanol (10 mL) and cold water (2 mL) successively, and dried to afford the white solid **6b** (656.4 mg, 75%).  $^1\text{H}$  NMR (400 MHz,  $\text{CDCl}_3$ )  $\delta$ : 8.65 (s, 1H), 8.16 (d,  $J = 1.6$  Hz, 1H), 8.10 (s, 1H), 7.94 (d,  $J = 8.8$  Hz, 1H), 7.53 (dd,  $J = 8.8$ , 2.0 Hz, 1H), 4.46 (q,  $J = 7.2$  Hz, 2H), 1.45 (t,  $J = 7.2$  Hz, 3H);  $^{13}\text{C}$  NMR (100 MHz,  $\text{CDCl}_3$ )  $\delta$ : 164.44, 162.20, 148.03, 136.47, 135.38, 132.72, 131.18, 129.76, 127.54, 127.33, 127.07, 124.00, 62.14, 14.29; MS (ESI):  $m/z$  calcd. For  $\text{C}_{14}\text{H}_{11}\text{ClNO}_2\text{S}$   $[\text{M}+\text{H}]^+$  292.0/294.0, found 291.9/293.9.

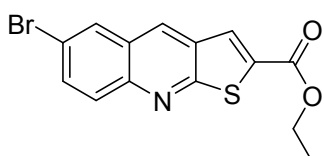

### ***Ethyl 6-bromothieno[2,3-b]quinoline-2-carboxylate (6c)***

The compound **4c** (811.5 mg, 3 mmol) was dissolved in GVL (6 mL) followed by addition of triethylamine (2.5 mL, 18 mmol) and ethyl mercaptoacetate (395  $\mu$ L, 3.6 mmol) consequently. The mixture was heated to 90 °C and stirred at that temperature for 1 h. After the reaction finished, the mixture was dropped into ice water (10 mL). The precipitate was isolated by filtration, washed with ethanol (10 mL) and cold water (2 mL) successively, and dried to afford the yellow solid **6c** (786.7 mg, 78%), <sup>1</sup>H NMR (400 MHz, CDCl<sub>3</sub>)  $\delta$  8.57 (s, 1H), 8.15 (d,  $J$  = 2.4 Hz, 1H), 8.10 (s, 1H), 8.03 (d,  $J$  = 8.8 Hz, 1H), 7.84 (dd,  $J$  = 9.2, 2.4 Hz, 1H), 4.46 (q,  $J$  = 7.2 Hz, 2H), 1.45 (t,  $J$  = 7.2 Hz, 3H); <sup>13</sup>C NMR (100 MHz, CDCl<sub>3</sub>)  $\delta$ : 163.78 , 162.17 , 146.46 , 136.02 , 133.90 , 131.75 , 131.64 , 130.34 , 130.13 , 127.48 , 126.70 , 119.62 , 62.19 , 14.29; MS (ESI): m/z calcd. For C<sub>14</sub>H<sub>11</sub>BrNO<sub>2</sub>S [M+H]<sup>+</sup> 336.0/338.0, found 335.8/337.9.

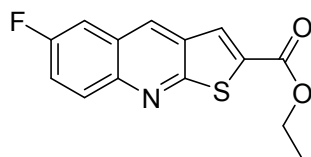

### ***Ethyl 6-fluorothieno[2,3-b]quinoline-2-carboxylate (6d)***

The compound **4d** (628.8 mg, 3 mmol) was dissolved in GVL (6 mL) followed by addition of triethylamine (2.5 mL, 18 mmol) and ethyl mercaptoacetate (395  $\mu$ L, 3.6 mmol) consequently. The mixture was heated to 90 °C and stirred at that temperature for 1 h. After the reaction finished, the mixture was dropped into ice water (10 mL). The precipitate was isolated by filtration, washed with ethanol (10 mL) and cold water (2 mL) successively, and dried to afford the white solid **6d** (760 mg, 92%). <sup>1</sup>H NMR (400 MHz, CDCl<sub>3</sub>)  $\delta$ : 8.61 (s, 1H), 8.18– 8.14 (m, 1H), 8.09 (s, 1H), 7.61– 7.57 (m, 2H), 4.46 (q,  $J$  = 7.2 Hz, 2H), 1.46 (t,  $J$  = 7.2 Hz, 3H); <sup>13</sup>C NMR (100 MHz, CDCl<sub>3</sub>)  $\delta$ : 162.82 , 162.23 , 159.75(d,  $J$  = 247.0 Hz, 1C), 145.24 , 135.92 , 132.07(d,  $J$  = 6.4 Hz, 1C), 131.61 , 130.95(d,  $J$  = 9.2 Hz,1C), 127.27 , 126.08(d,  $J$  = 10.2 Hz,1C), 121.30(d,  $J$  = 26.6 Hz, 1C), 110.86 (d,  $J$  = 21.9 Hz, 1C), 62.14 , 14.29; MS (ESI): m/z calcd. For C<sub>14</sub>H<sub>11</sub>FNO<sub>2</sub>S [M+H]<sup>+</sup> 276.0, found 276.0.

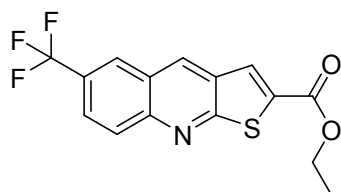

### ***Ethyl 6-(trifluoromethyl)thieno[2,3-b]quinoline-2-carboxylate (6e)***

The compound **4e** (778.8 mg, 3 mmol) was dissolved in GVL (6 mL) followed by addition of triethylamine (2.5 mL, 18 mmol) and ethyl mercaptoacetate (395  $\mu$ L, 3.6 mmol) consequently. The mixture was heated to 90 °C and stirred at that temperature for 1 h. After the reaction finished, the mixture was dropped into ice water (10 mL). The precipitate was isolated by filtration, washed with ethanol (10 mL) and cold water (2 mL) successively, and dried to afford the white solid **6e** (497.8 mg, 51%). <sup>1</sup>H NMR (400 MHz, CDCl<sub>3</sub>)  $\delta$ : 8.77 (s, 1H), 8.33 (s, 1H), 8.28 (d,  $J$  = 9.2 Hz, 1H), 8.15 (s, 1H), 7.95 (dd,  $J$  = 8.8, 2.0 Hz, 1H), 4.48 (q,  $J$  = 7.2 Hz, 2H), 1.46 (t,  $J$  = 7.2 Hz, 3H); <sup>13</sup>C NMR (100 MHz, CDCl<sub>3</sub>)  $\delta$ : 165.56 , 162.07 , 148.43 , 136.36 , 133.78 , 132.00 , 129.82 , 127.73 (d,  $J$  = 32.6 Hz, 1C), 127.37 , 126.75 (d,  $J$  = 3.0 Hz, 1C), 125.88 (d,  $J$  = 1.2 Hz, 1C), 125.40 (q,  $J$  = 217.8 Hz, 1C), 124.40 , 62.28 , 14.29; MS (ESI): m/z calcd. For C<sub>15</sub>H<sub>11</sub>F<sub>3</sub>NO<sub>2</sub>S [M+H]<sup>+</sup> 326.0, found 326.0.

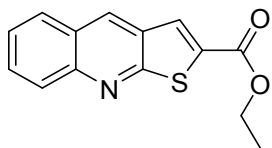

### ***Ethyl thieno[2,3-*b*]quinoline-2-carboxylate (6f)<sup>2</sup>***

The compound **4f** (574.8 mg, 3 mmol) was dissolved in GVL (6 mL) followed by addition of triethylamine (2.5 mL, 18 mmol) and ethyl mercaptoacetate (395  $\mu$ L, 3.6 mmol) consequently. The mixture was heated to 90 °C and stirred at that temperature for 1 h. After the reaction finished, the mixture was dropped into ice water (10 mL). The precipitate was isolated by filtration, washed with ethanol (10 mL) and cold water (2 mL) successively, and dried to afford the white solid **6f** (617.3 mg, 80%). <sup>1</sup>H NMR (400 MHz, CDCl<sub>3</sub>)  $\delta$ : 8.65 (s, 1H), 8.15 (d,  $J$  = 8.4 Hz, 1H), 8.09 (s, 1H), 7.99 – 7.97 (m, 1H), 7.82 – 7.78 (m, 1H), 7.59 – 7.55 (m, 1H), 4.46 (q,  $J$  = 7.2 Hz, 2H), 1.45 (t,  $J$  = 7.2 Hz, 3H); <sup>13</sup>C NMR (100 MHz, CDCl<sub>3</sub>)  $\delta$ : 163.56 , 162.42 , 148.11 , 135.07 , 133.01 , 131.17 , 130.58 , 128.67 , 128.48 , 127.77 , 125.88 , 125.77 , 62.06 , 14.32; MS (ESI):  $m/z$  calcd. For C<sub>14</sub>H<sub>12</sub>NO<sub>2</sub>S [M+H]<sup>+</sup> 258.1, found 258.0.

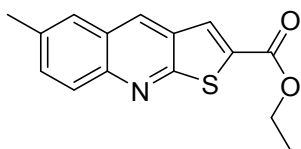

### ***Ethyl 6-methylthieno[2,3-*b*]quinoline-2-carboxylate (6g)***

The compound **4g** (616.8 mg, 3 mmol) was dissolved in GVL (6 mL) followed by addition of triethylamine (2.5 mL, 18 mmol) and ethyl mercaptoacetate (395  $\mu$ L, 3.6 mmol) consequently. The mixture was heated to 90 °C and stirred at that temperature for 1 h. After the reaction finished, the mixture was dropped into ice water (10 mL). The precipitate was isolated by filtration, washed with ethanol (10 mL) and cold water (2 mL) successively, and dried to afford the white solid **6g** (675.3 mg, 83%). <sup>1</sup>H NMR (400 MHz, CDCl<sub>3</sub>)  $\delta$ : 8.56 (s, 1H), 8.09 (s, 1H), 8.05 (d,  $J$  = 8.8 Hz, 1H), 7.73 (s, 1H), 7.63 (dd,  $J$  = 8.8, 2.0 Hz, 1H), 4.45 (q,  $J$  = 7.2 Hz, 2H), 2.58 (s, 3H), 1.45 (t,  $J$  = 7.2 Hz, 3H); <sup>13</sup>C NMR (100 MHz, CDCl<sub>3</sub>)  $\delta$ : 162.72 , 162.48 , 146.97 , 135.72 , 134.76 , 133.17 , 132.18 , 131.17 , 128.09 , 127.85 , 127.08 , 125.86 , 62.00 , 21.61 , 14.31; MS (ESI):  $m/z$  calcd. For C<sub>15</sub>H<sub>14</sub>NO<sub>2</sub>S [M+H]<sup>+</sup> 272.1, found 272.0.

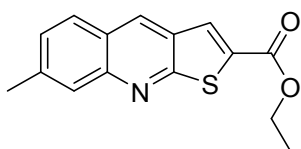

### ***Ethyl 7-methylthieno[2,3-*b*]quinoline-2-carboxylate (6h)***

The compound **4h** (616.8 mg, 3 mmol) was dissolved in GVL (6 mL) followed by addition of triethylamine (2.5 mL, 18 mmol) and ethyl mercaptoacetate (395  $\mu$ L, 3.6 mmol) consequently. The mixture was heated to 90 °C and stirred at that temperature for 1 h. After the reaction finished, the mixture was dropped into ice water (10 mL). The precipitate was isolated by filtration, washed with ethanol (10 mL) and cold water (2 mL) successively, and dried to afford the white solid **6h** (610.3 mg, 75%). <sup>1</sup>H NMR (400 MHz, CDCl<sub>3</sub>)  $\delta$ : 8.57 (s, 1H), 8.05 (s, 1H), 7.90 (s, 1H), 7.85 (d,  $J$  = 8.4 Hz, 1H), 7.39 (d,  $J$  = 8.4, 1H), 4.45 (q,  $J$  = 7.2 Hz, 2H), 2.60 (s, 3H), 1.44 (t,  $J$  = 7.2 Hz, 3H); <sup>13</sup>C NMR (100 MHz, CDCl<sub>3</sub>)  $\delta$ : 163.62 , 162.50 , 148.44 , 141.29 , 134.21 , 132.68 , 130.50 , 128.40 ,

128.24 , 127.92 , 127.20 , 123.97 , 61.97 , 22.20 , 14.32; MS (ESI):  $m/z$  calcd. For  $C_{15}H_{14}NO_2S$   $[M+H]^+$  272.1, found 272.0.

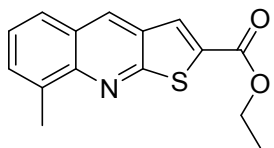

#### ***Ethyl 8-methylthieno[2,3-b]quinoline-2-carboxylate (6i)***

The compound **4i** (616.8 mg, 3 mmol) was dissolved in GVL (6 mL) followed by addition of triethylamine (2.5 mL, 18 mmol) and ethyl mercaptoacetate (395  $\mu$ L, 3.6 mmol) consequently. The mixture was heated to 90 °C and stirred at that temperature for 1 h. After the reaction finished, the mixture was dropped into ice water (10 mL). The precipitate was isolated by filtration, washed with ethanol (10 mL) and cold water (2 mL) successively, and dried to afford the white solid **6i** (667.2 mg, 82%).  $^1H$  NMR (400 MHz,  $CDCl_3$ )  $\delta$ : 8.63 (s, 1H), 8.10 (s, 1H), 7.83 (d,  $J = 8.0$  Hz, 1H), 7.64 (d,  $J = 7.2$  Hz, 1H), 7.46 (m, 1H), 4.46 (q,  $J = 7.2$  Hz, 2H), 2.88 (s, 3H), 1.45 (t,  $J = 7.2$  Hz, 3H);  $^{13}C$  NMR (100 MHz,  $CDCl_3$ )  $\delta$ : 162.70 , 162.56 , 147.50 , 136.48 , 134.85 , 133.09 , 130.79 , 130.34 , 127.73 , 126.61 , 125.72 , 125.59 , 61.96 , 18.33 , 14.32; MS (ESI):  $m/z$  calcd. For  $C_{15}H_{14}NO_2S$   $[M+H]^+$  272.1, found 272.0.

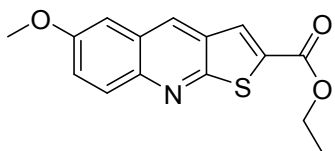

#### ***Ethyl 6-methoxythieno[2,3-b]quinoline-2-carboxylate (6j)***<sup>3</sup>

The compound **4j** (664.8 mg, 3 mmol) was dissolved in GVL (6 mL) followed by addition of triethylamine (2.5 mL, 18 mmol) and ethyl mercaptoacetate (395  $\mu$ L, 3.6 mmol) consequently. The mixture was heated to 90 °C and stirred at that temperature for 1 h. After the reaction finished, the mixture was dropped into ice water (10 mL). The precipitate was isolated by filtration, washed with ethanol (10 mL) and cold water (2 mL) successively, and dried to afford the white solid **6j** (723.7 mg, 84%).  $^1H$  NMR (400 MHz,  $CDCl_3$ )  $\delta$ : 8.55 (s, 1H), 8.08 (s, 1H), 8.05 (d,  $J = 8.8$  Hz, 1H), 7.47 (dd,  $J = 9.2, 2.8$  Hz, 1H), 7.19 (d,  $J = 2.8$  Hz, 1H), 4.46 (q,  $J = 7.2$  Hz, 2H), 3.97 (s, 3H), 1.45 (t,  $J = 7.2$  Hz, 3H);  $^{13}C$  NMR (100 MHz,  $CDCl_3$ )  $\delta$ : 162.47 , 161.09 , 157.13 , 144.80 , 134.90 , 131.30 , 131.25, 129.79 , 127.57 , 126.74 , 124.42 , 104.73 , 61.98 , 55.56 , 14.31; MS (ESI):  $m/z$  calcd. For  $C_{15}H_{14}NO_3S$   $[M+H]^+$  288.1, found 288.0.

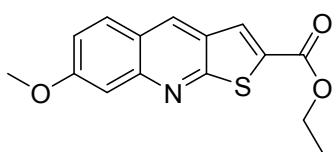

#### ***Ethyl 7-methoxythieno[2,3-b]quinoline-2-carboxylate (6k)***

The compound **4k** (664.8 mg, 3 mmol) was dissolved in GVL (6 mL) followed by addition of triethylamine (2.5 mL, 18 mmol) and ethyl mercaptoacetate (395  $\mu$ L, 3.6 mmol) consequently. The mixture was heated to 90 °C and stirred at that temperature for 1 h. After the reaction finished, the mixture was dropped into ice water (10 mL). The precipitate was isolated by filtration, washed with ethanol (10 mL) and cold water (2 mL) successively, and

dried to afford the white solid **6k** (706.5 mg, 82%). <sup>1</sup>H NMR (400 MHz, CDCl<sub>3</sub>) δ: 8.55 (s, 1H), 8.07 (s, 1H), 7.85 (d, *J* = 9.2 Hz, 1H), 7.43 (d, *J* = 2.4 Hz, 1H), 7.23 (dd, *J* = 8.8, 2.4 Hz, 1H), 4.45 (q, *J* = 7.2 Hz, 2H), 3.99 (s, 3H), 1.44 (t, *J* = 7.2 Hz, 3H); <sup>13</sup>C NMR (100 MHz, CDCl<sub>3</sub>) δ: 164.09, 162.57, 161.75, 150.09, 133.05, 132.64, 129.70, 129.39, 128.09, 121.46, 120.15, 105.66, 61.90, 55.65, 14.33; MS (ESI): *m/z* calcd. For C<sub>15</sub>H<sub>14</sub>NO<sub>3</sub>S [M+H]<sup>+</sup> 288.1, found 288.0.

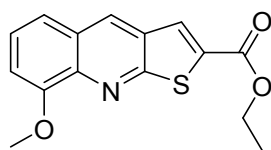

#### **Ethyl 8-methoxythieno[2,3-*b*]quinoline-2-carboxylate (6l)**

The compound **4l** (664.8 mg, 3 mmol) was dissolved in GVL (6 mL) followed by addition of triethylamine (2.5 mL, 18 mmol) and ethyl mercaptoacetate (395 μL, 3.6 mmol) consequently. The mixture was heated to 90 °C and stirred at that temperature for 1 h. After the reaction finished, the mixture was dropped into ice water (10 mL). The precipitate was isolated by filtration, washed with ethanol (10 mL) and cold water (2 mL) successively, and dried to afford the white solid **6l** (689.4 mg, 80%). <sup>1</sup>H NMR (400 MHz, CDCl<sub>3</sub>) δ: 8.64 (s, 1H), 8.10 (s, 1H), 7.58-7.56 (m, 1H), 7.51-7.47 (m, 1H), 7.15-7.12 (m, 1H), 4.45 (q, *J* = 7.2 Hz, 2H), 4.15 (s, 3H), 1.45 (t, *J* = 7.2 Hz, 3H); <sup>13</sup>C NMR (100 MHz, CDCl<sub>3</sub>) δ: 162.72, 162.42, 154.52, 140.36, 135.64, 132.88, 131.60, 127.41, 126.81, 125.81, 120.44, 108.01, 62.02, 56.19, 14.31; MS (ESI): *m/z* calcd. For C<sub>15</sub>H<sub>14</sub>NO<sub>3</sub>S [M+H]<sup>+</sup> 288.1, found 288.0.

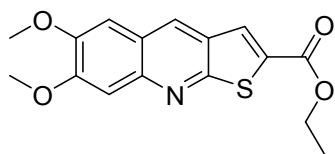

#### **Ethyl 6,7-dimethoxythieno[2,3-*b*]quinoline-2-carboxylate (6m)**

The compound **4m** (755.1 mg, 3 mmol) was dissolved in GVL (6 mL) followed by addition of triethylamine (2.5 mL, 18 mmol) and ethyl mercaptoacetate (395 μL, 3.6 mmol) consequently. The mixture was heated to 90 °C and stirred at that temperature for 1 h. After the reaction finished, the mixture was dropped into ice water (10 mL). The precipitate was isolated by filtration, washed with ethanol (10 mL) and cold water (2 mL) successively, and dried to afford the white solid **6m** (849.9 mg, 89%). <sup>1</sup>H NMR (400 MHz, CDCl<sub>3</sub>) δ: 8.46 (s, 1H), 8.05 (s, 1H), 7.43 (s, 1H), 7.15 (s, 1H), 4.44 (q, *J* = 7.2 Hz, 2H), 4.08 (s, 3H), 4.05 (s, 3H), 1.44 (t, *J* = 7.2 Hz, 3H); <sup>13</sup>C NMR (100 MHz, CDCl<sub>3</sub>) δ: 162.63, 161.57, 153.85, 149.63, 145.97, 132.93, 130.68, 129.61, 127.87, 121.78, 106.48, 105.00, 61.84, 56.25, 56.07, 14.32; MS (ESI): *m/z* calcd. For C<sub>16</sub>H<sub>16</sub>NO<sub>4</sub>S [M+H]<sup>+</sup> 318.1, found 318.0.

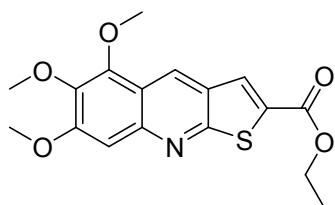

#### **Ethyl 5,6,7-trimethoxythieno[2,3-*b*]quinoline-2-carboxylate (6n)**

The compound **4n** (845.1 mg, 3 mmol) was dissolved in GVL (6 mL) followed by addition of triethylamine (2.5 mL, 18 mmol) and ethyl mercaptoacetate (395  $\mu$ L, 3.6 mmol) consequently. The mixture was heated to 90 °C and stirred at that temperature for 1 h. After the reaction finished, the mixture was dropped into ice water (10 mL). The precipitate was isolated by filtration, washed with ethanol (10 mL) and cold water (2 mL) successively, and dried to afford the white solid **6n** (708.5 mg, 68%). <sup>1</sup>H NMR (400 MHz, CDCl<sub>3</sub>)  $\delta$ : 8.83 (s, 1H), 8.09 (s, 1H), 7.26 (s, 1H), 4.44 (q,  $J$  = 7.2 Hz, 2H), 4.14 (s, 3H), 4.05 (s, 3H), 4.00 (s, 3H), 1.44 (t,  $J$  = 7.2 Hz, 3H); <sup>13</sup>C NMR (100 MHz, CDCl<sub>3</sub>)  $\delta$ : 163.31, 162.61, 157.35, 147.16, 146.30, 140.05, 132.89, 129.23, 128.34, 127.60, 117.78, 102.48, 61.88, 61.66, 61.34, 56.22, 14.33; MS (ESI):  $m/z$  calcd. For C<sub>17</sub>H<sub>18</sub>NO<sub>5</sub>S [M+H]<sup>+</sup> 348.1, found 348.0.

### III. PTP1B and Related PTPs Biological Assay

A colorimetric assay to measure inhibition against PTP1B (1 – 321), TCPTP (13 – 358) and SHP2 (219 – 525) was performed in OptiPlate-384 black plates (cat no. 6007279). Briefly, the tested compounds and NSC87877 (purchased from Selleck) were solubilized in DMSO and serially diluted into concentrations for the inhibitory test and then incubated with enzymes for 20 minutes, followed by addition of 6,8-difluoro-4-methylumbelliferyl phosphate (DiFMUP, Invitrogen, cat. no. D22065). The enzymatic activities of the PTP1B, TCPTP and SHP2 were determined at room temperature by monitoring the dephosphorylation of DiFMUP, products were then detected at a 340 nm excitation wavelength and 450 nm emission wavelength by the EnVision multilabe plate reader (Perkin-Elmer Life Sciences, Boston, MA, USA) within 10 minutes. The assays were carried out in a final volume of 50  $\mu$ L containing 50 mM 4-(2-hydroxyethyl)-1-piperazineethanesulfonic acid (HEPES), pH 7.2, 50  $\mu$ M DiFMUP, 1 nM enzyme, 1 mM dithiothreitol (DTT), 100 mM NaCl, 0.05% BSA and 1% DMSO. The enzyme reaction rate (FI / min) was defined by the slope of the reaction curve that was linear at the beginning of the reaction. The inhibitor dose-response curves were analyzed using a four-parameter concentration–response model in GraphPad Prism 8<sup>6,7</sup>.

### IV. References

- 
- <sup>1</sup>Y. Zhao, M. Li, B. Li, S. Zhang, A. Su, Y. Xing, Z. Ge, R. Li and B. Yang, *Eur. J. Med. Chem.*, 2019, **172**, 131-142.
  - <sup>2</sup>P. Mahajan, M. Nikam, A. Asrondkar, A. Bobade, & C. Gill, *J. Heterocycl. Chem.*, 2016, **54**, 1415–1422.
  - <sup>3</sup>B. Nandeshwarappa, A. K. Basappa and H. Naik, *J. Sulfur Chem.*, 2005, **26**, 373-379.
  - <sup>4</sup>F. I. McGonagle, H. F. Sneddon, C. Jamieson and A. J. B. Watson, *ACS Sustainable Chem. Eng.*, 2014, **2**, 523–532.
  - <sup>5</sup>T. W. Bousfield, K. P. R. Pearce, S. B. Nyamini, A. Angelis-Dimakis and J. E. Camp, *Green Chem.*, 2019, **21**, 3675-3681.
  - <sup>6</sup>S. Welte, K.-H. Baringhaus, W. Schmider, G. Müller, S. Petry and N. Tennagels, *Anal Biochem.*, 2005, **338**, 32-38.
  - <sup>7</sup>N. Krishnan, D. Koveal, D. Miller, B. Xue, S. Akshinthala, J. Kragelj, M. Jensen, C.-M. Gauss, R. Page, M. Blackledge, S. Muthuswamy, W. Peti and N. Tonks, *Nat. Chem. Biol.*, 2014, **10**, 558-566.

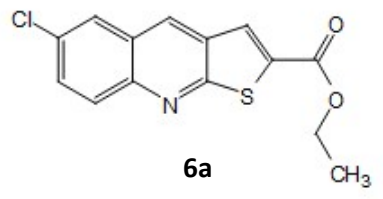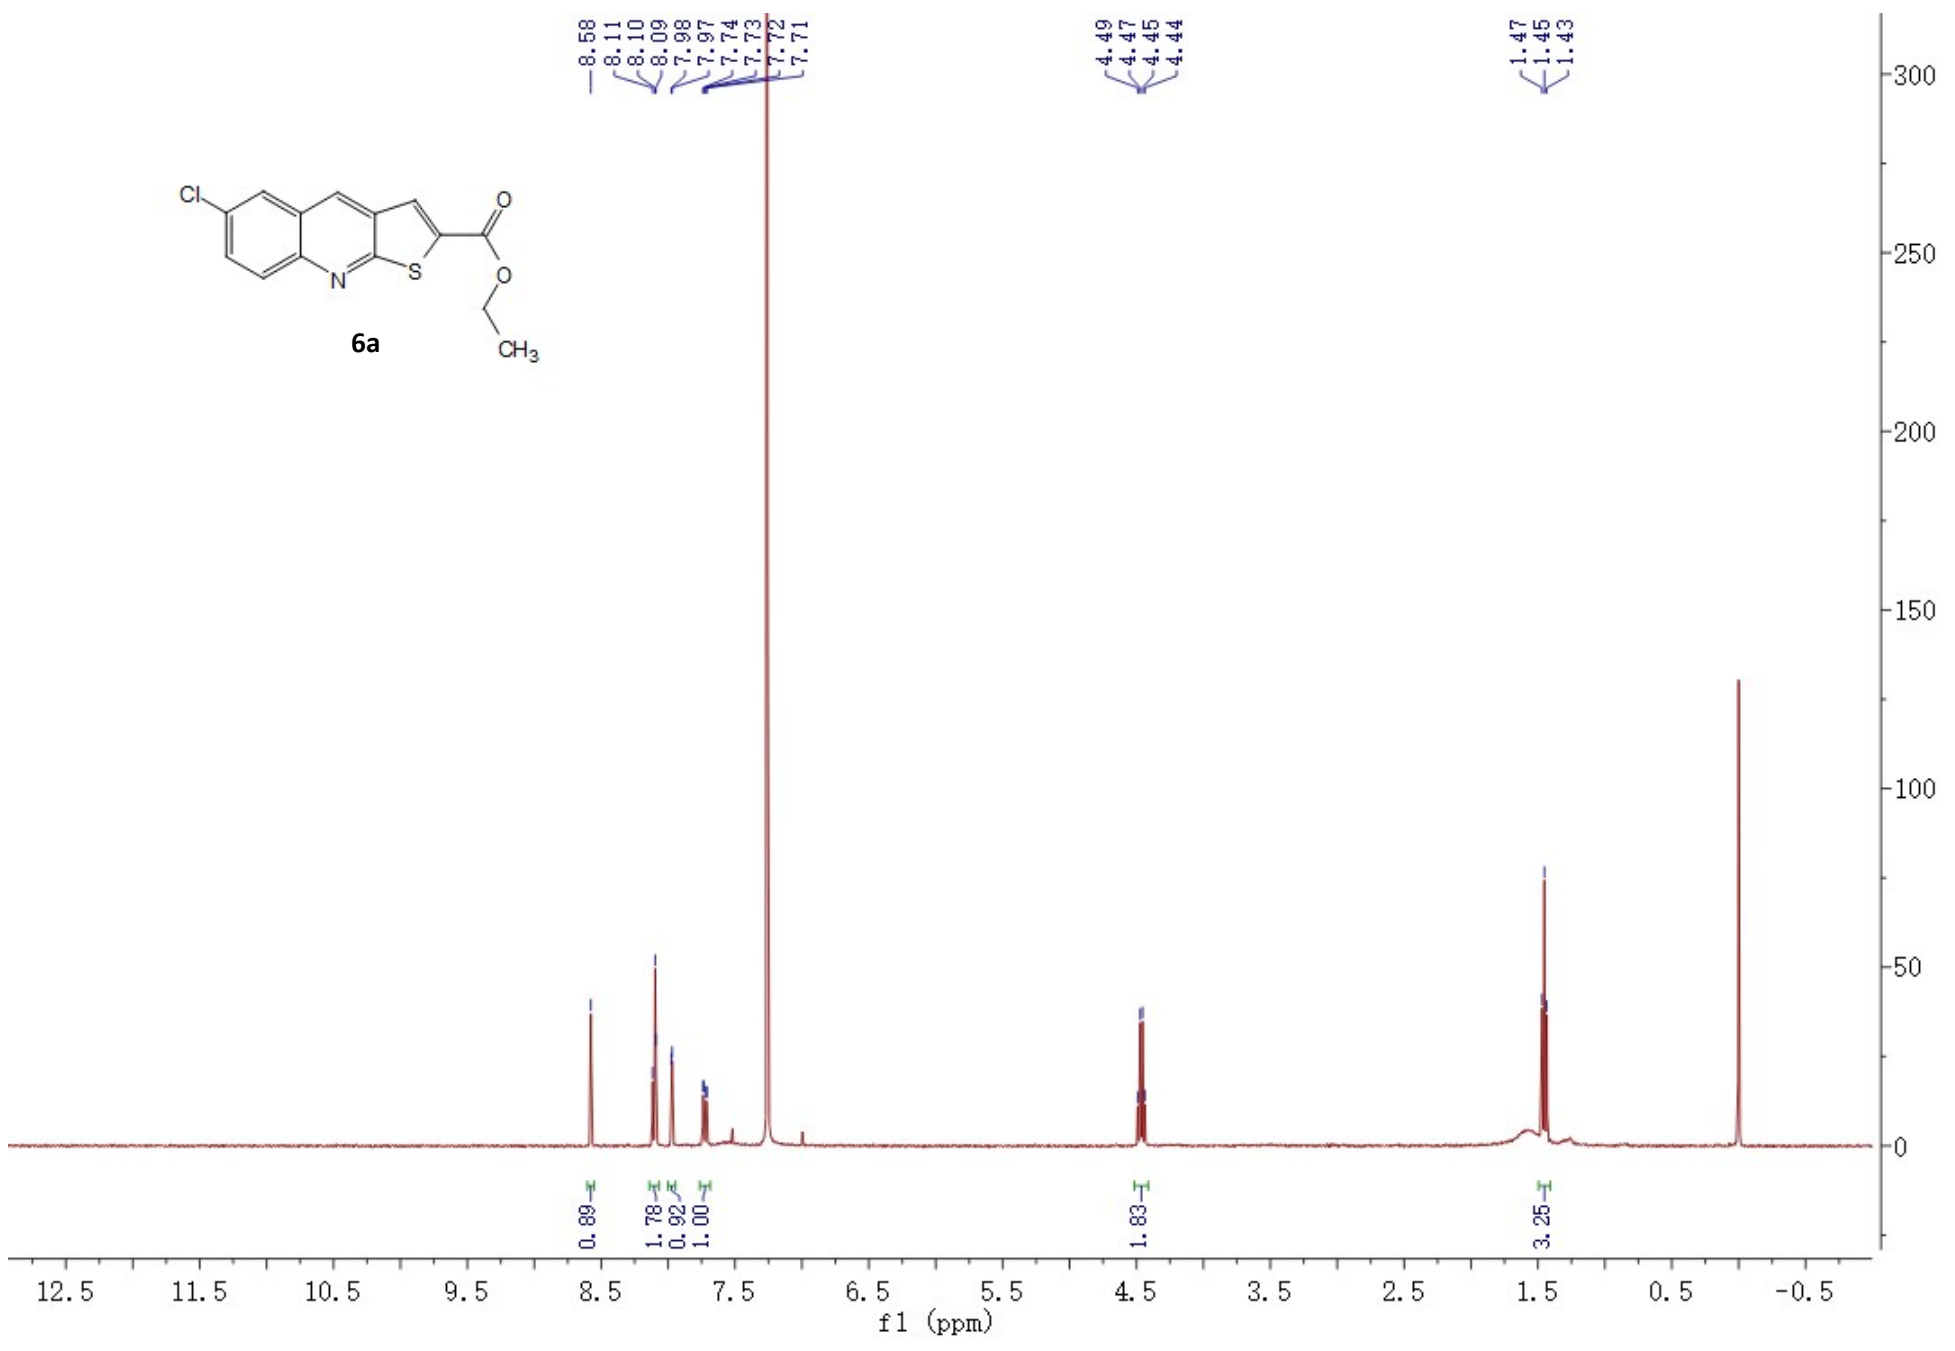



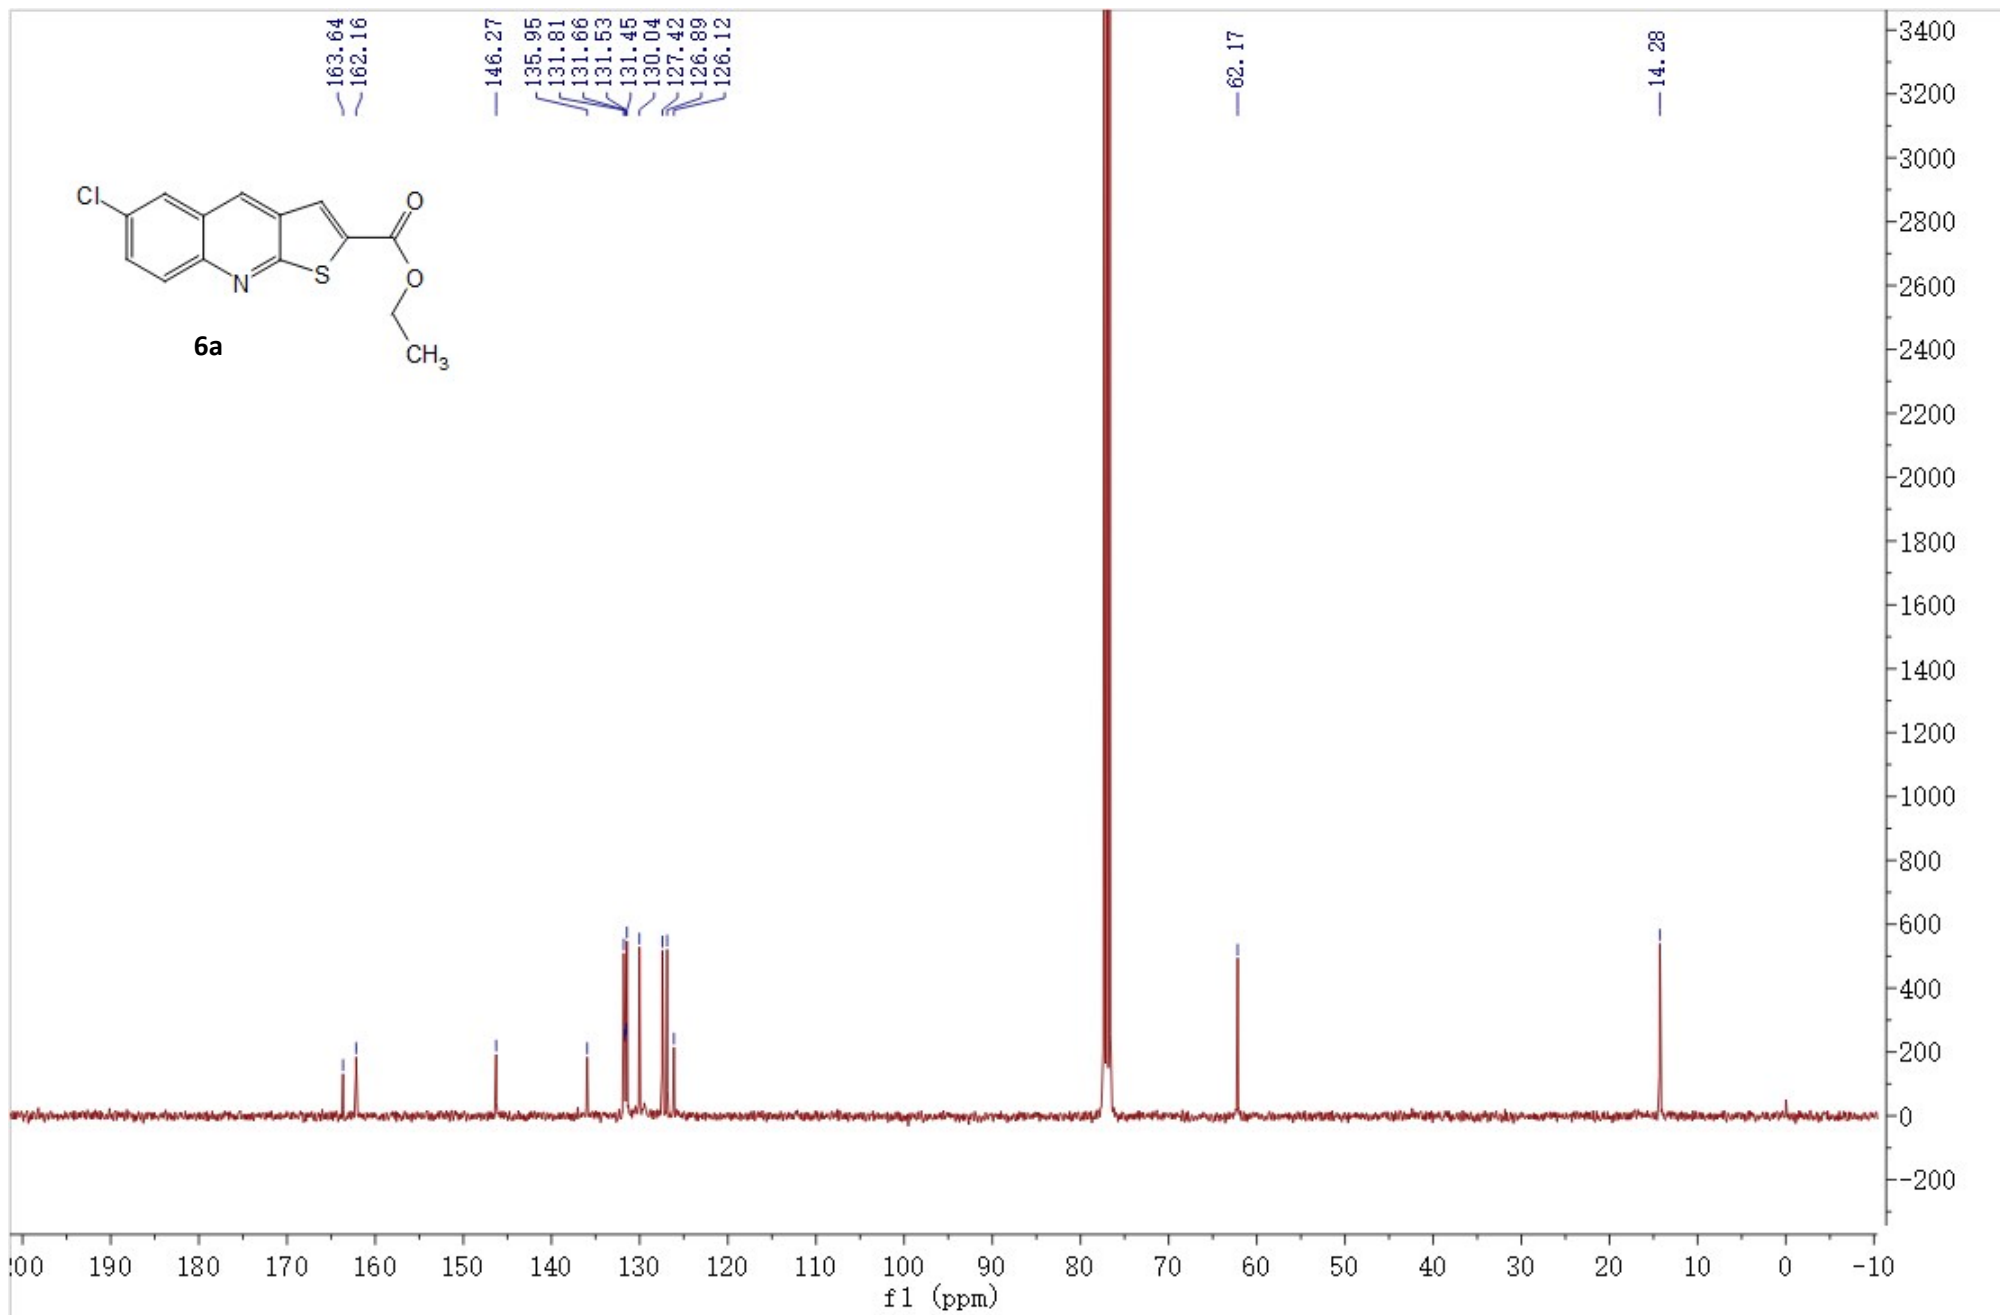

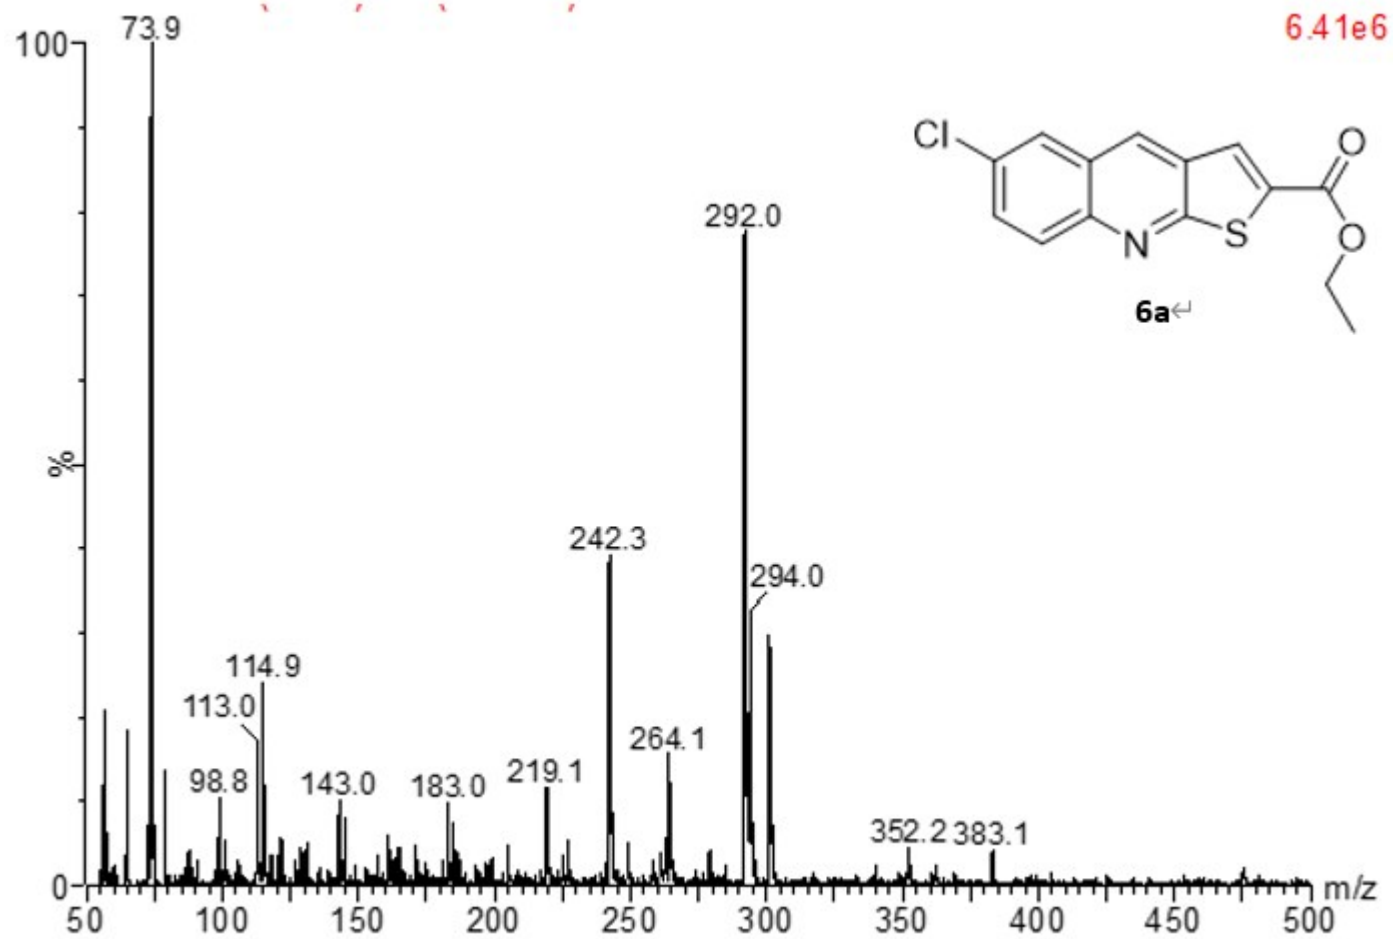

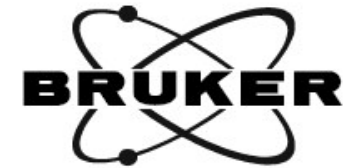

NAME XY-291-2-20200110-HNMR  
EXPNO 1  
PROCNO 1  
Date\_ 20200110  
Time 11.01  
INSTRUM spect  
PROBHD 5 mm PABBO BB-  
PULPROG zg30  
TD 32768  
SOLVENT CDCl3  
NS 8  
DS 0  
SWH 8223.685 Hz  
FIDRES 0.250967 Hz  
AQ 1.9923444 sec  
RG 203  
DW 60.800 usec  
DE 6.50 usec  
TE 673.2 K  
D1 1.00000000 sec  
TD0 1

==== CHANNEL f1 =====  
NUC1 1H  
P1 11.90 usec  
PL1 -2.30 dB  
PL1W 18.55620956 W  
SFO1 400.1424710 MHz  
SI 32768  
SF 400.1400083 MHz  
WDW EM  
SSB 0  
LB 0.30 Hz  
GB 0  
PC 1.00

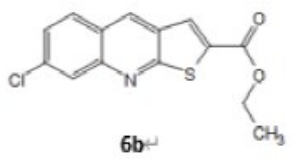

8.649  
8.163  
8.159  
8.100  
7.946  
7.924  
7.545  
7.540  
7.523  
7.518  
7.264  
7.000

4.490  
4.472  
4.455  
4.437

1.583  
1.471  
1.454  
1.436  
1.311  
1.252  
0.880  
0.070  
-0.000

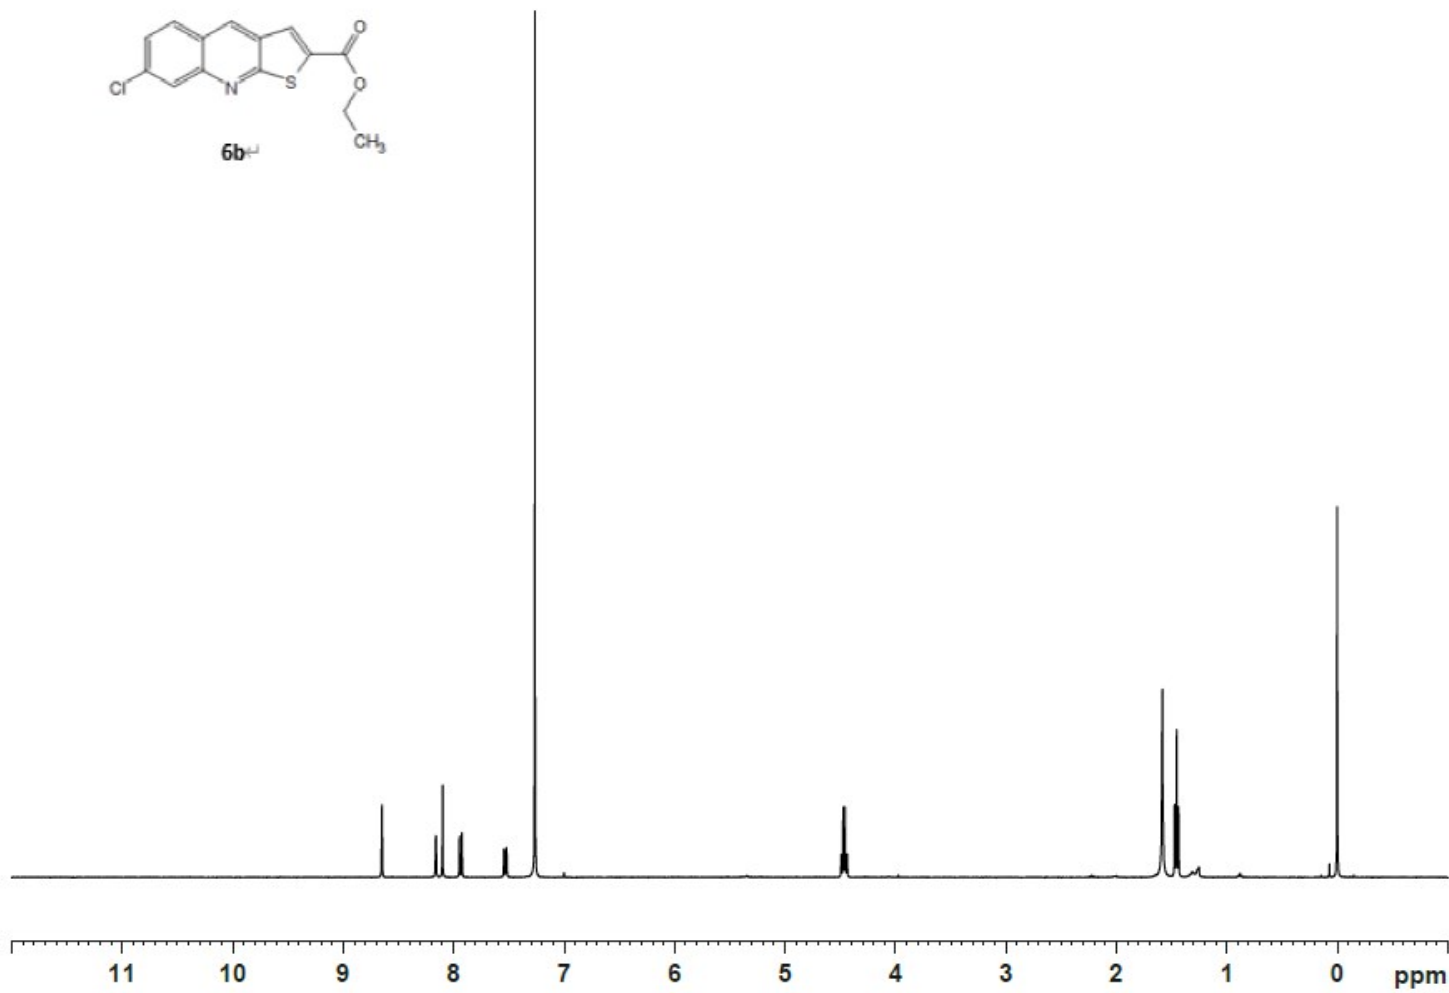

1.000  
0.942  
0.982  
1.030  
1.042

2.086

3.173

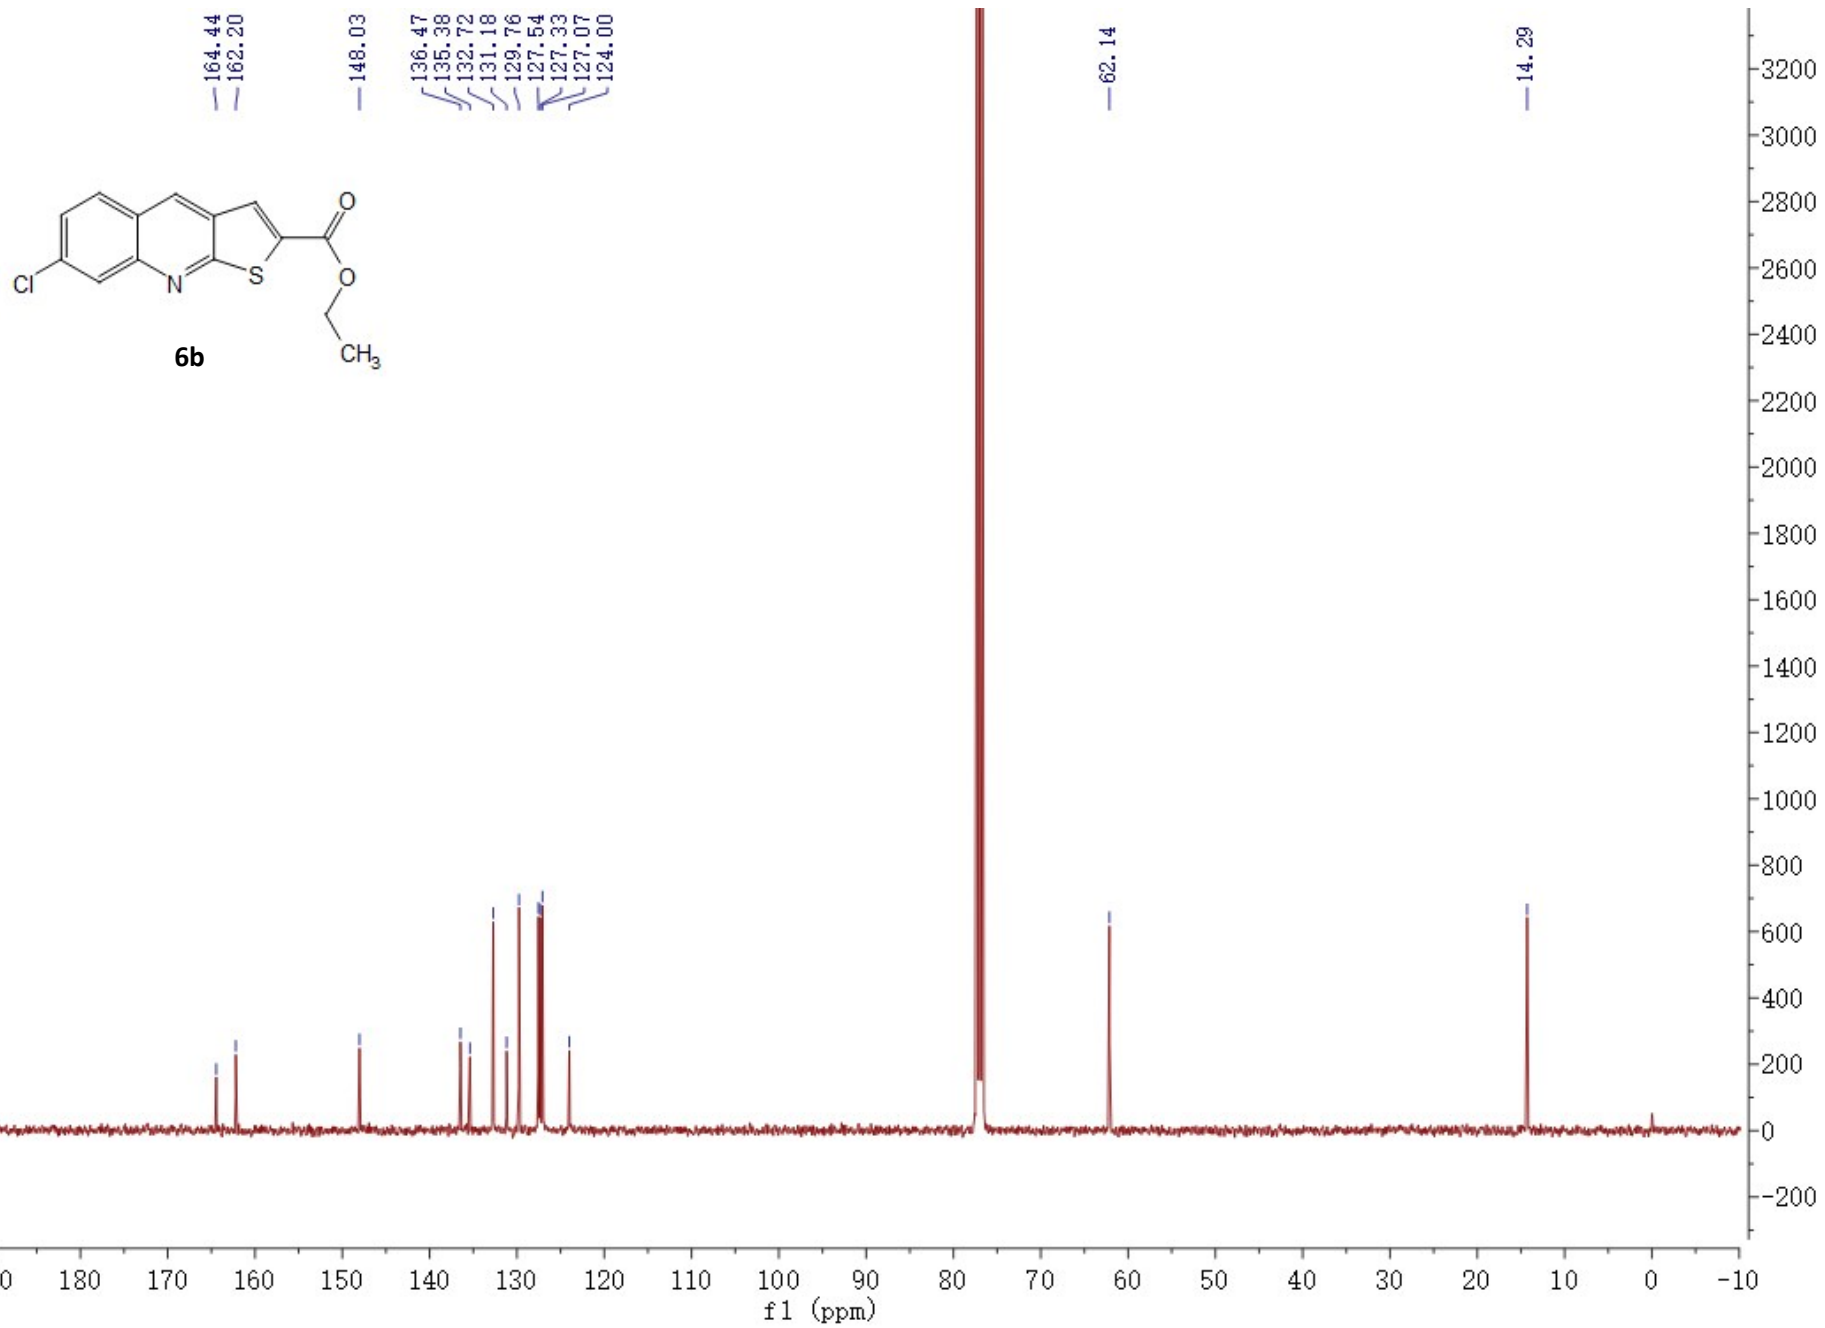

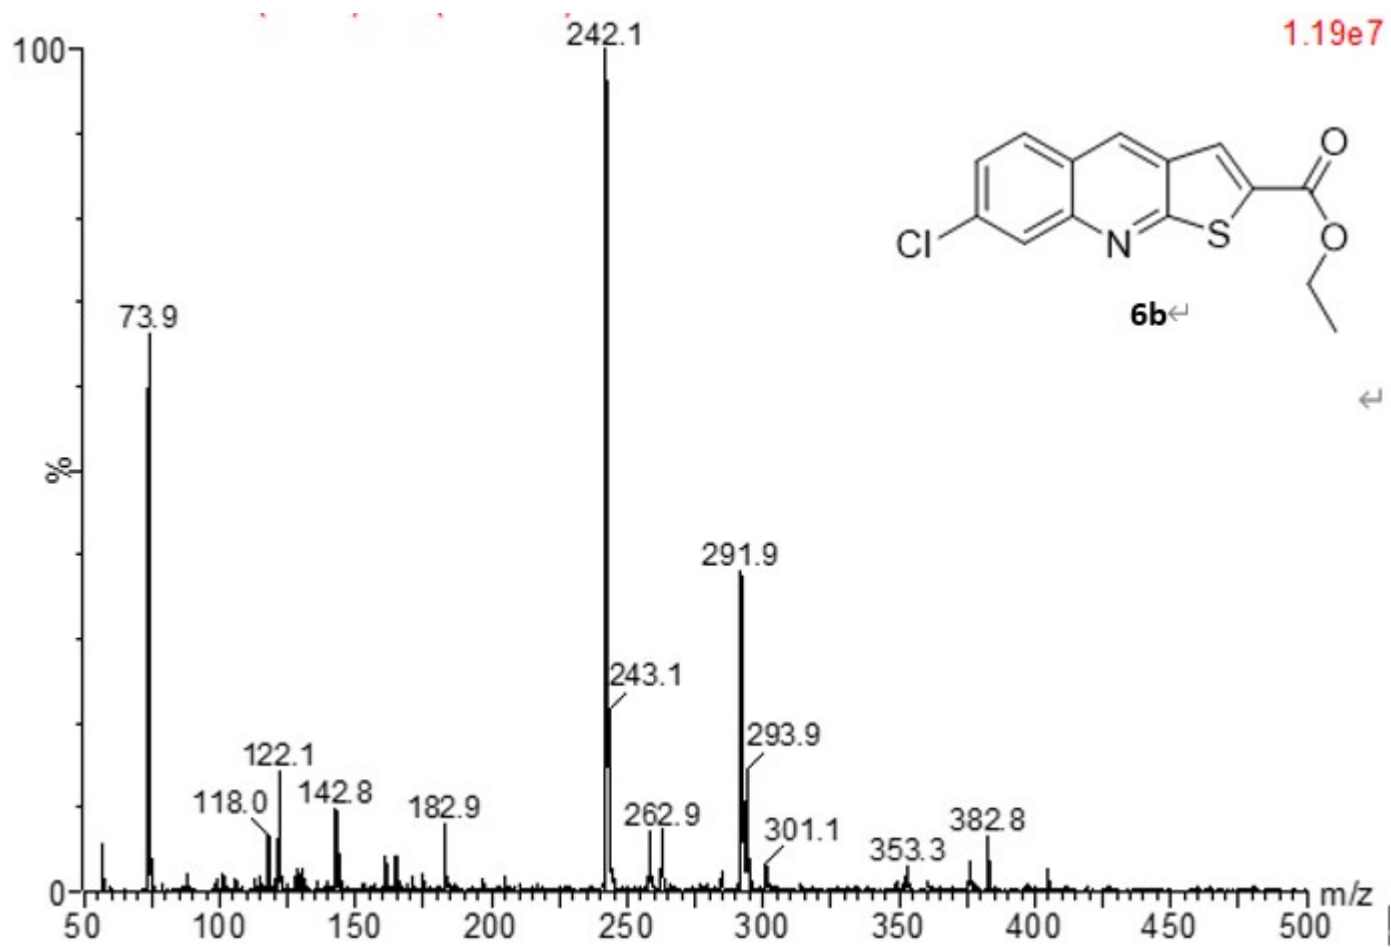

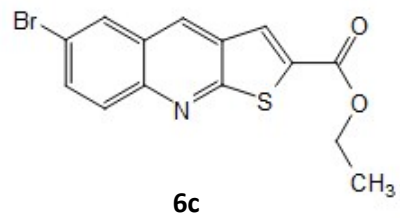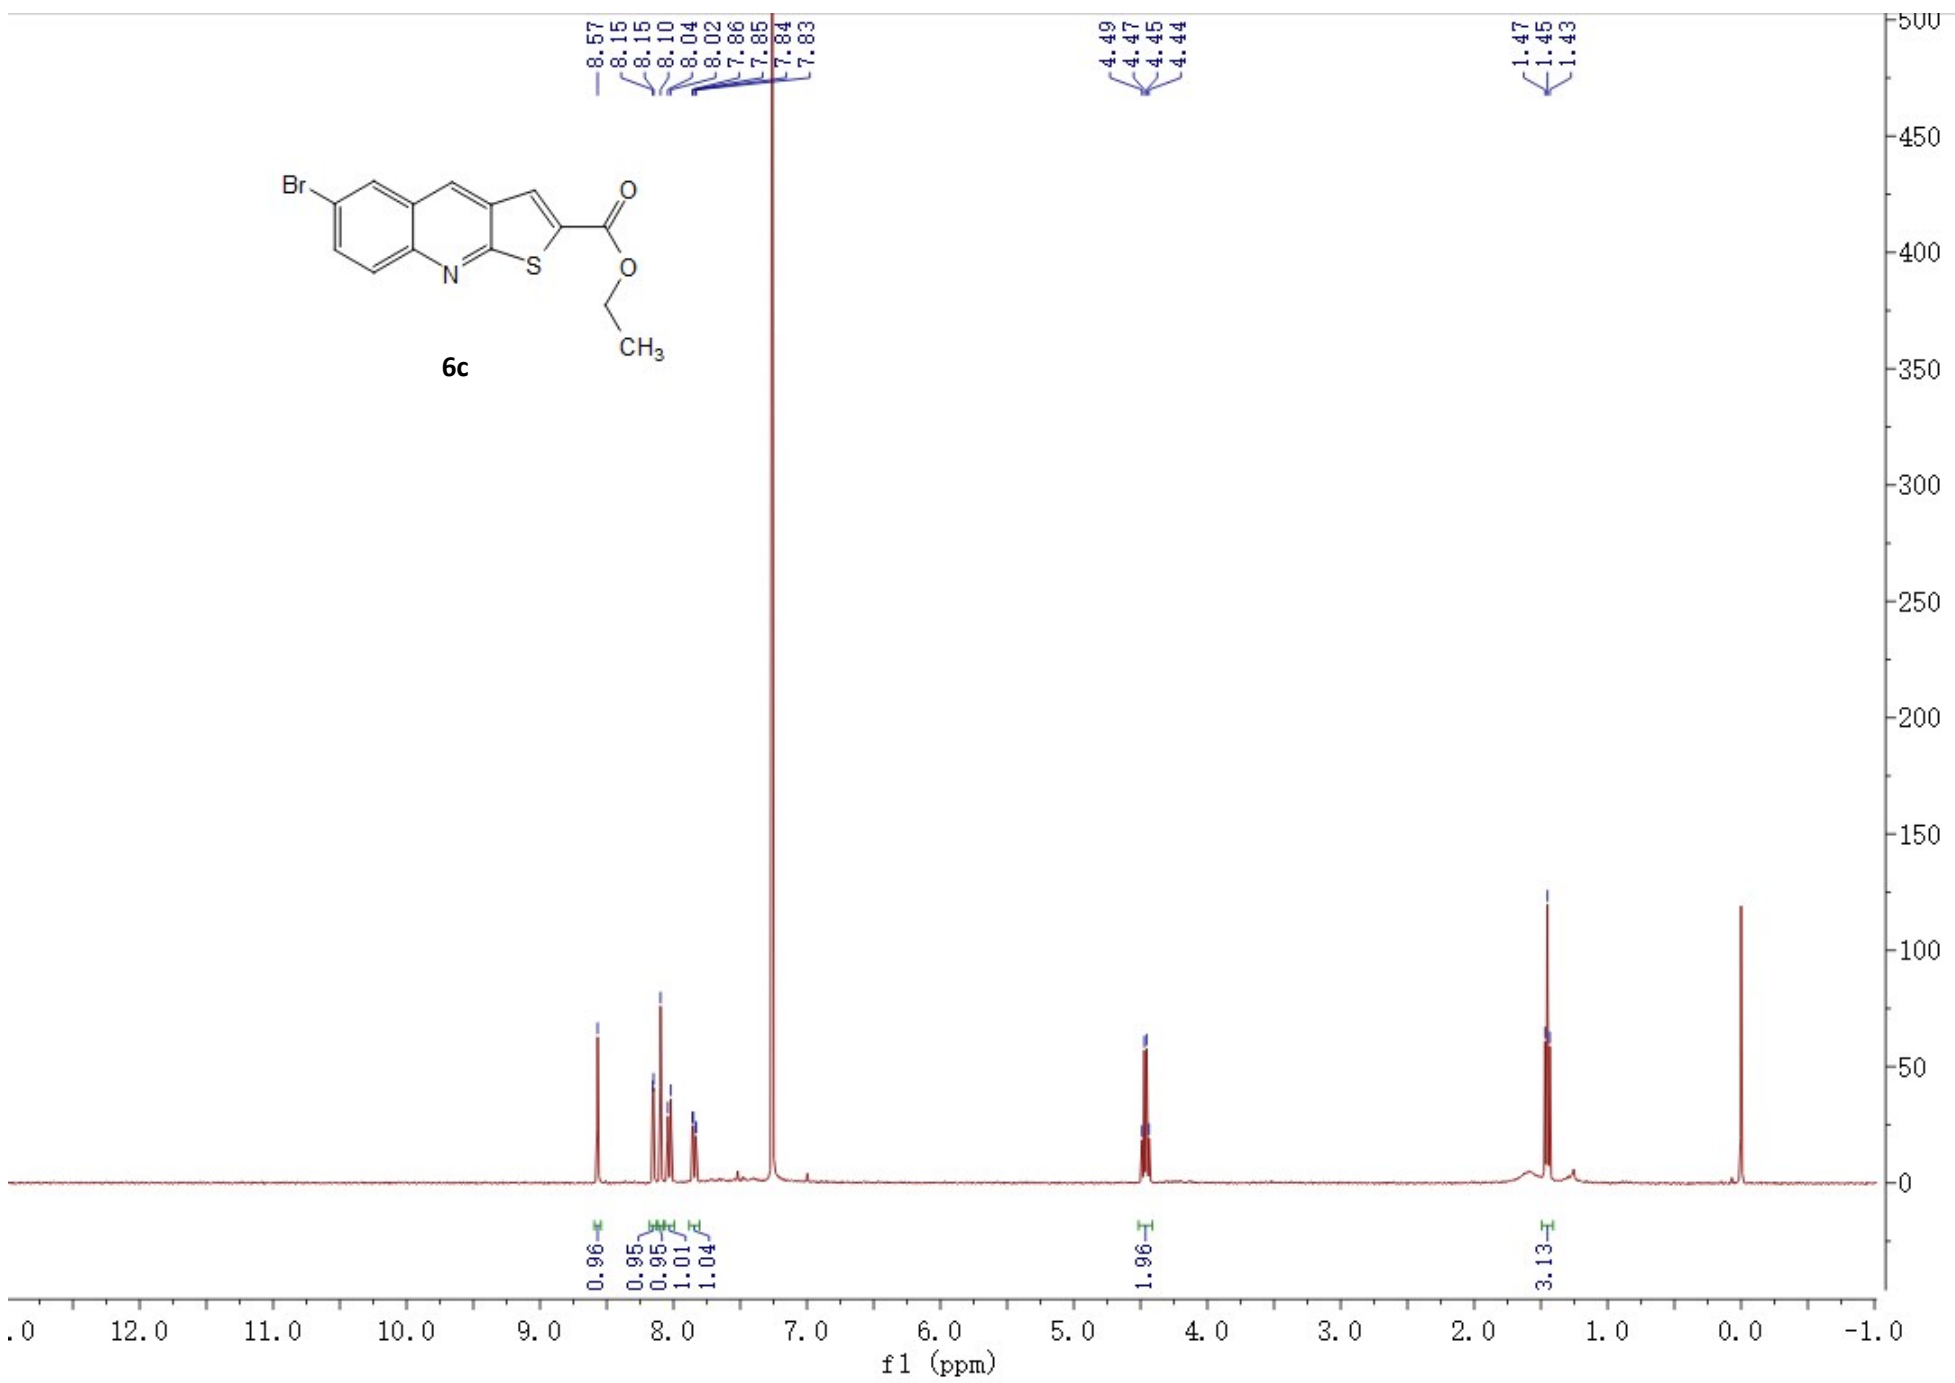

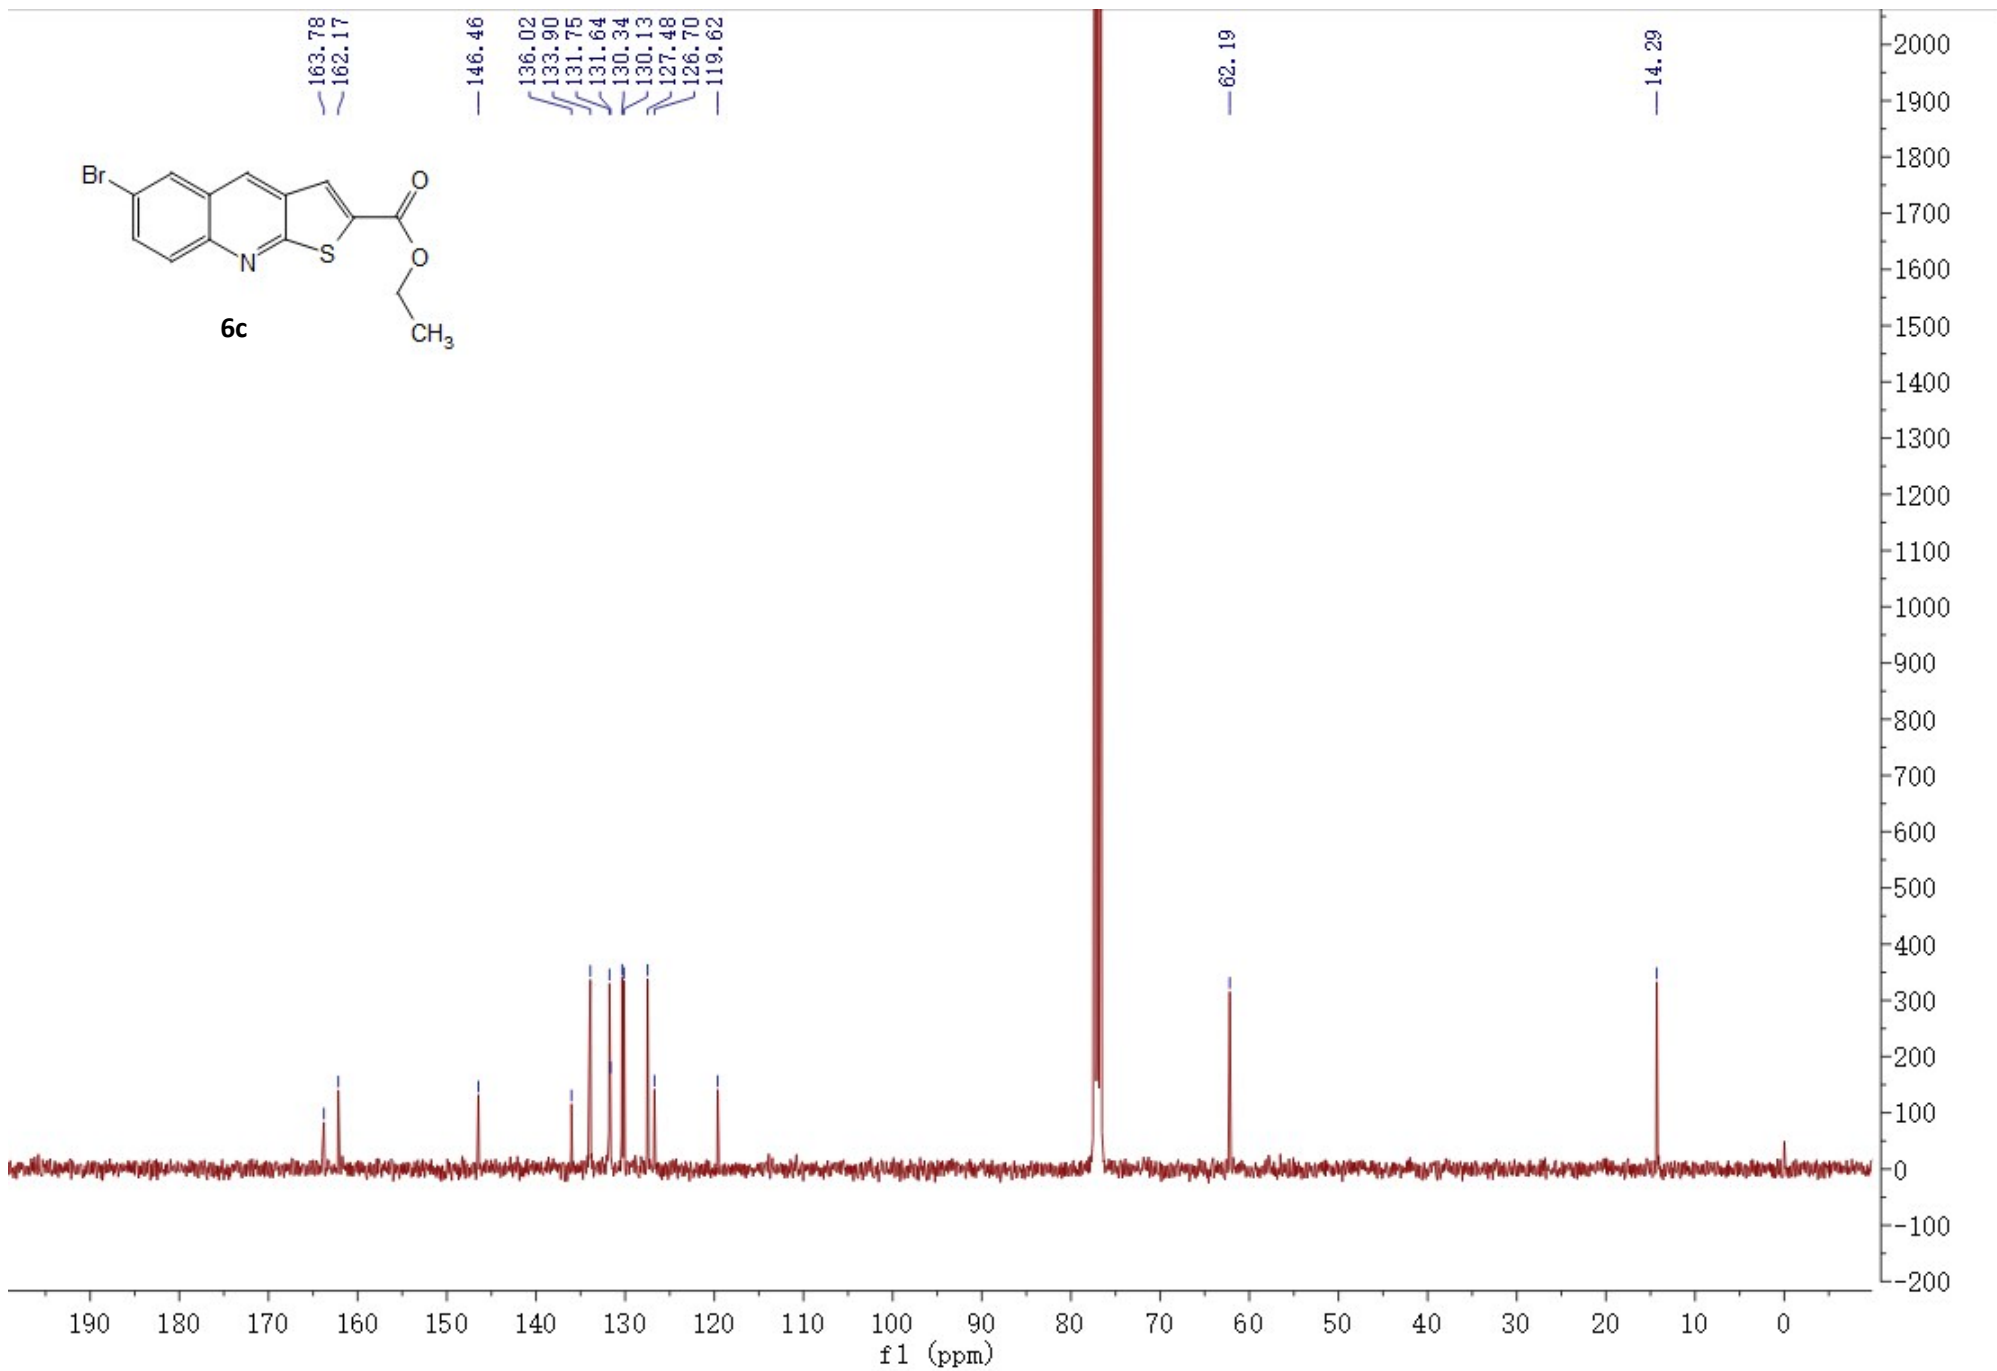

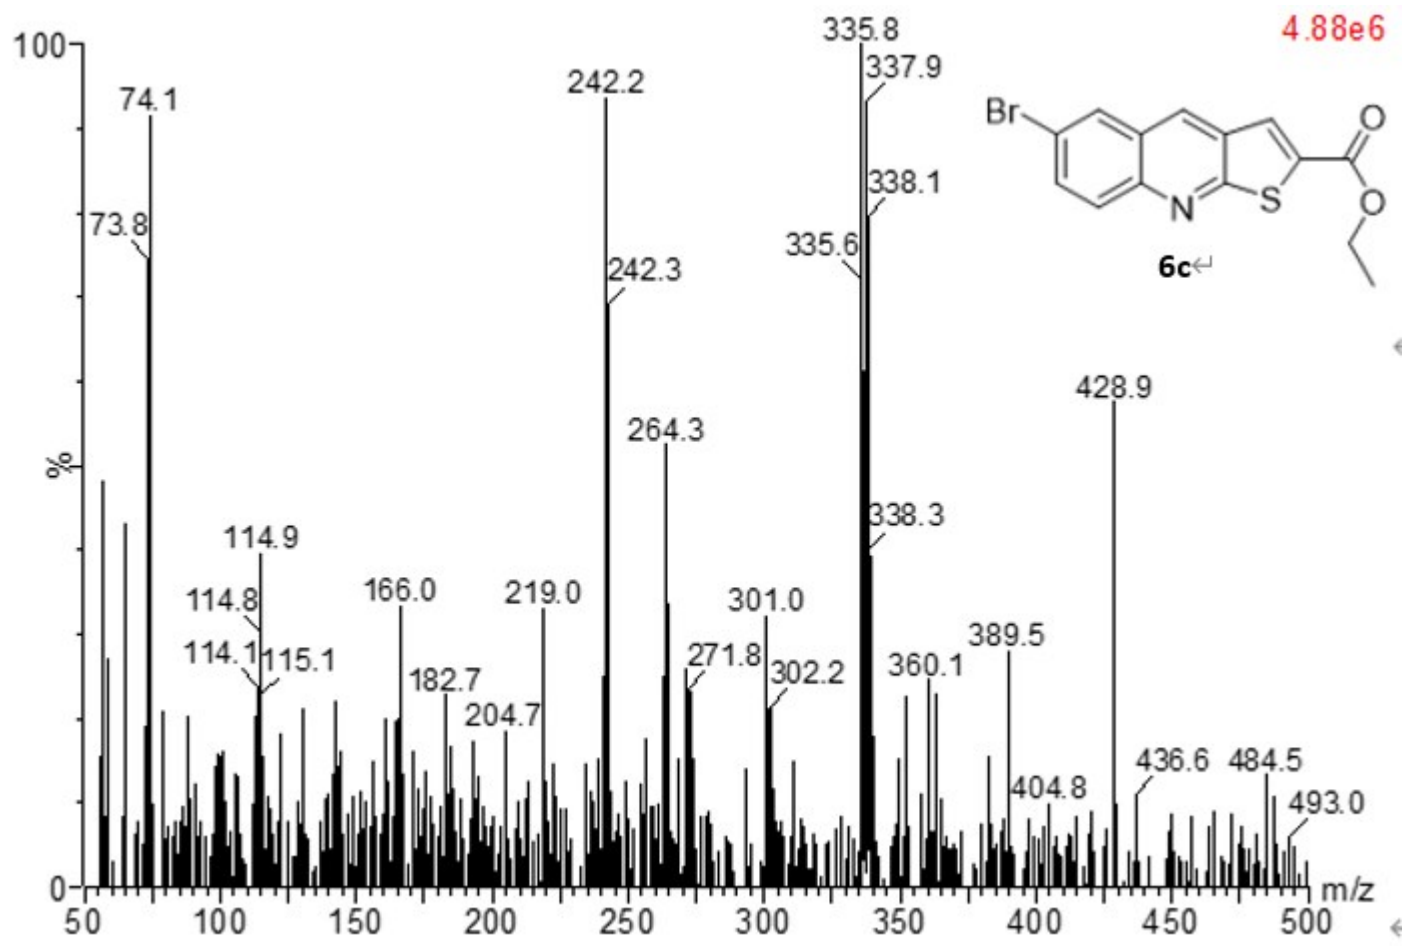



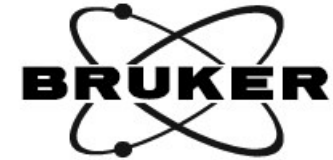

NAME XY-275-20200117-HNMR  
EXPNO 1  
PROCNO 1  
Date\_ 20200117  
Time\_ 12.03  
INSTRUM spect  
PROBHD 5 mm PABBO BB-  
PULPROG zg30  
TD 32768  
SOLVENT CDCl3  
NS 8  
DS 0  
SWH 8223.685 Hz  
FIDRES 0.250967 Hz  
AQ 1.9923444 sec  
RG 203  
DW 60.800 usec  
DE 6.50 usec  
TE 673.2 K  
D1 1.00000000 sec  
TDO 1

===== CHANNEL f1 =====  
NUC1 1H  
P1 11.90 usec  
PL1 -2.30 dB  
PL1W 18.55620956 W  
SFO1 400.1424710 MHz  
SI 32768  
SF 400.1400076 MHz  
WDW EM  
SSB 0  
LB 0.30 Hz  
GB 0  
PC 1.00

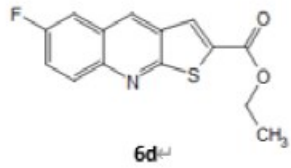

8.612  
8.181  
8.168  
8.155  
8.143  
8.085  
7.617  
7.610  
7.604  
7.598  
7.591  
7.583  
7.576  
7.571  
7.564  
7.265

4.491  
4.473  
4.455  
4.438

1.612  
1.473  
1.455  
1.437

0.007  
-0.000  
-0.008

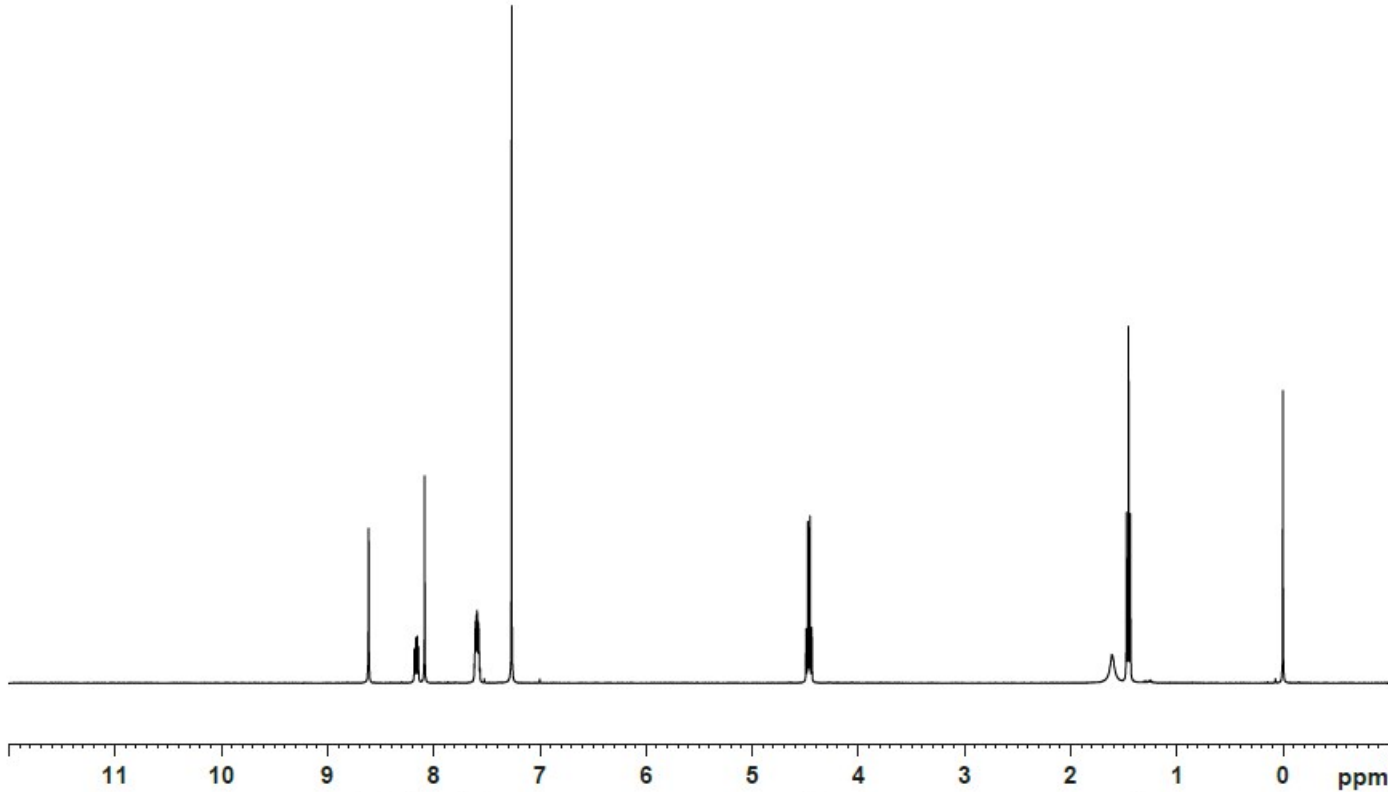

1.028  
1.000  
0.988  
2.053

2.070

3.122

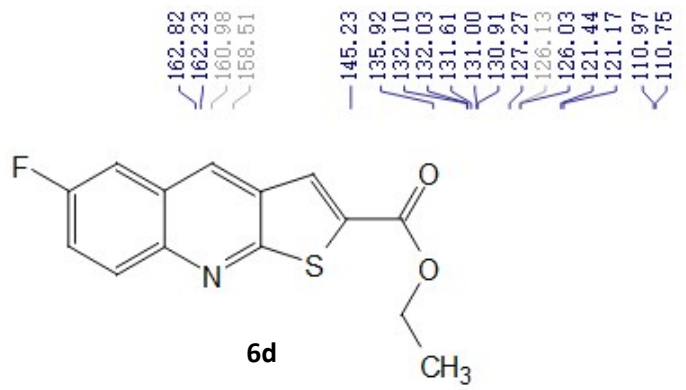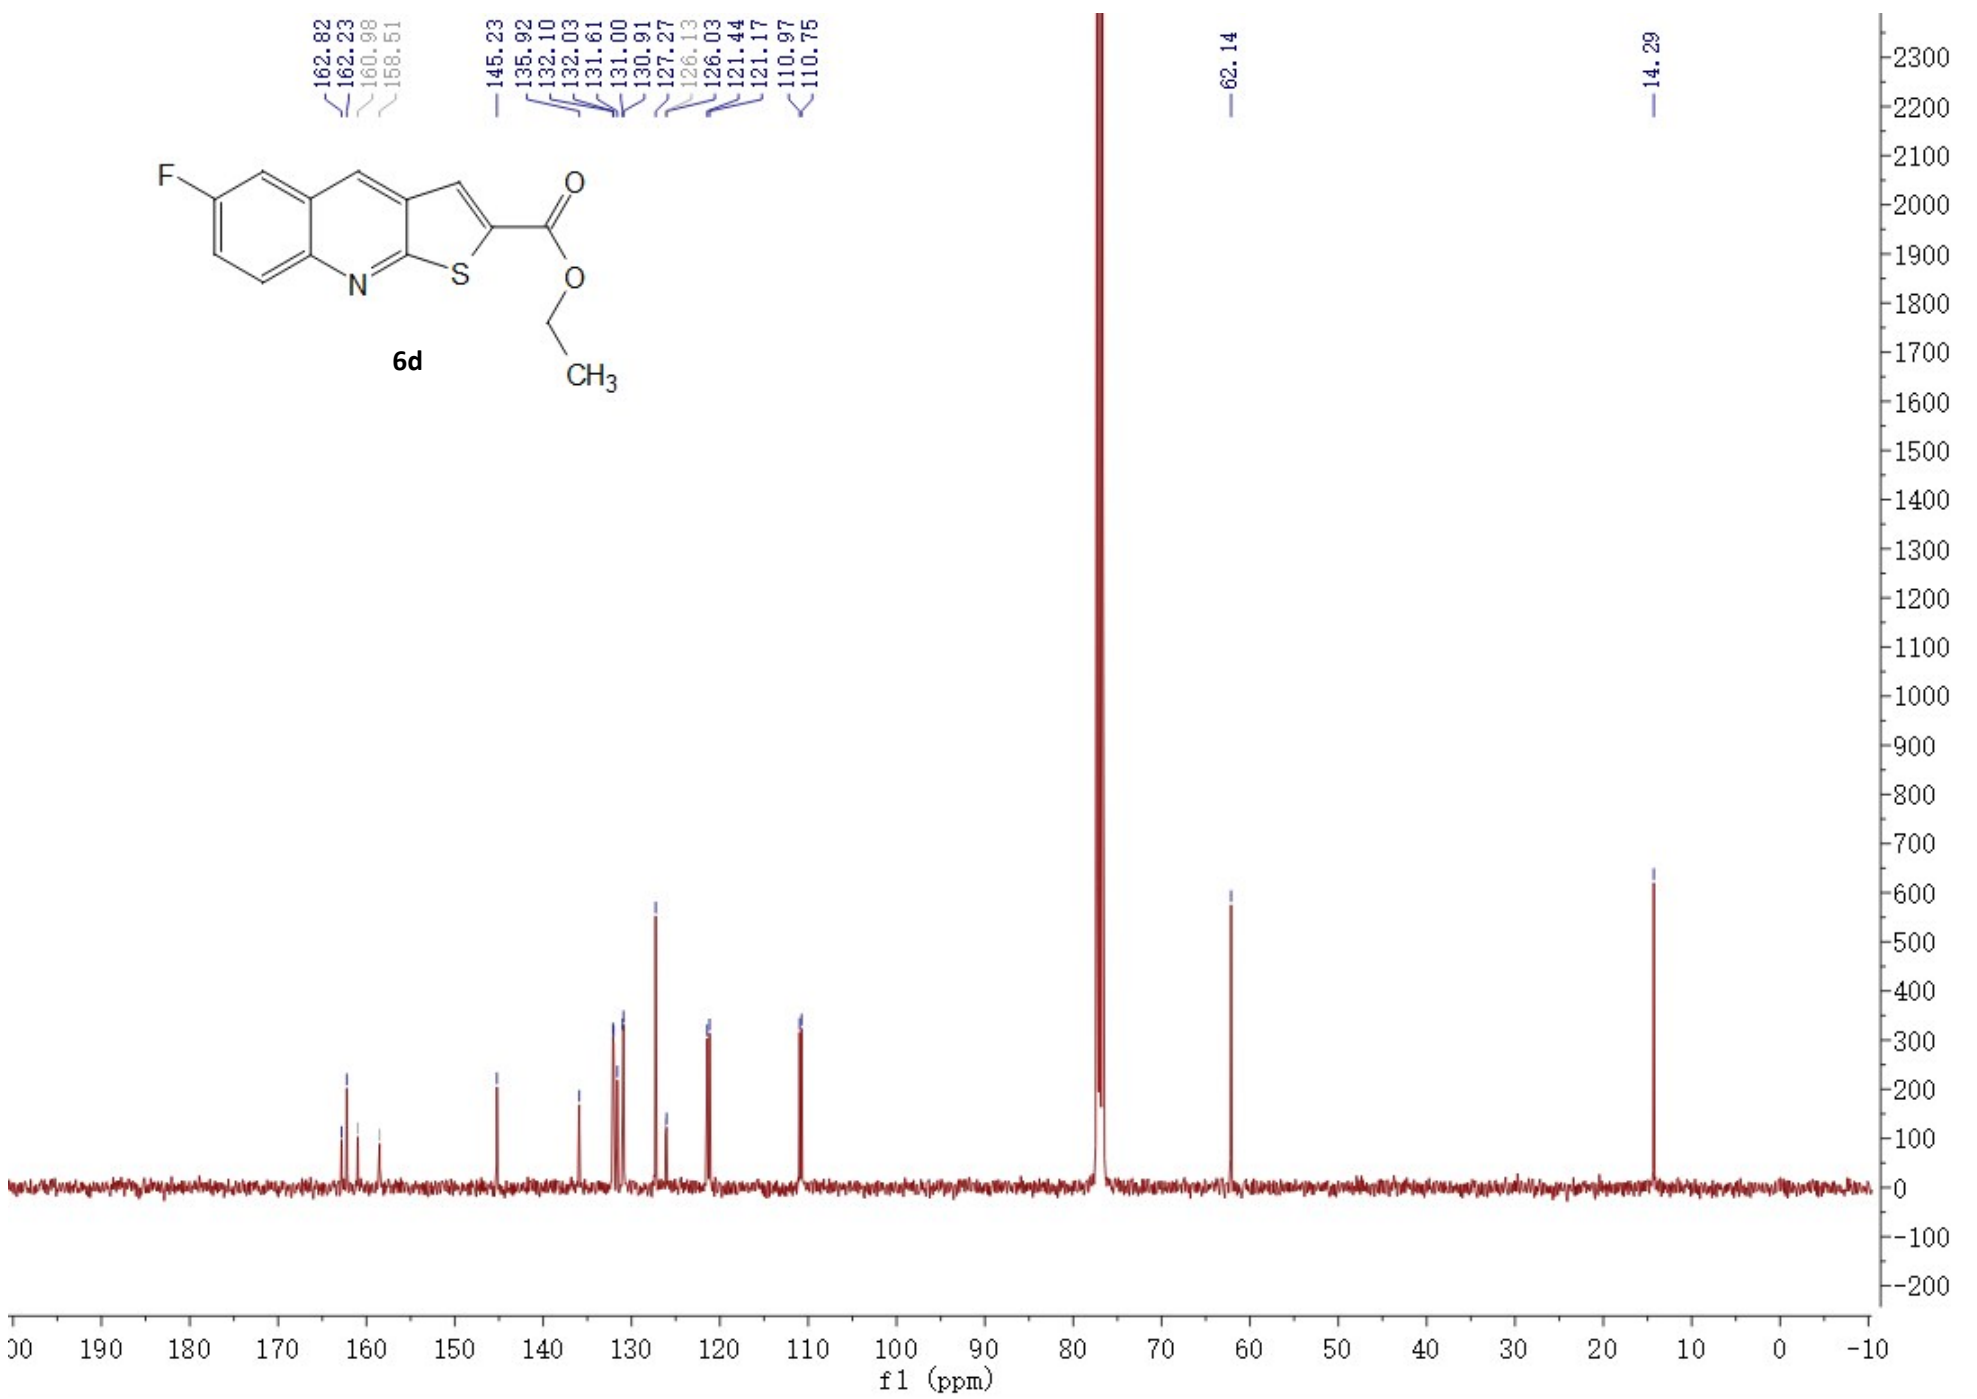

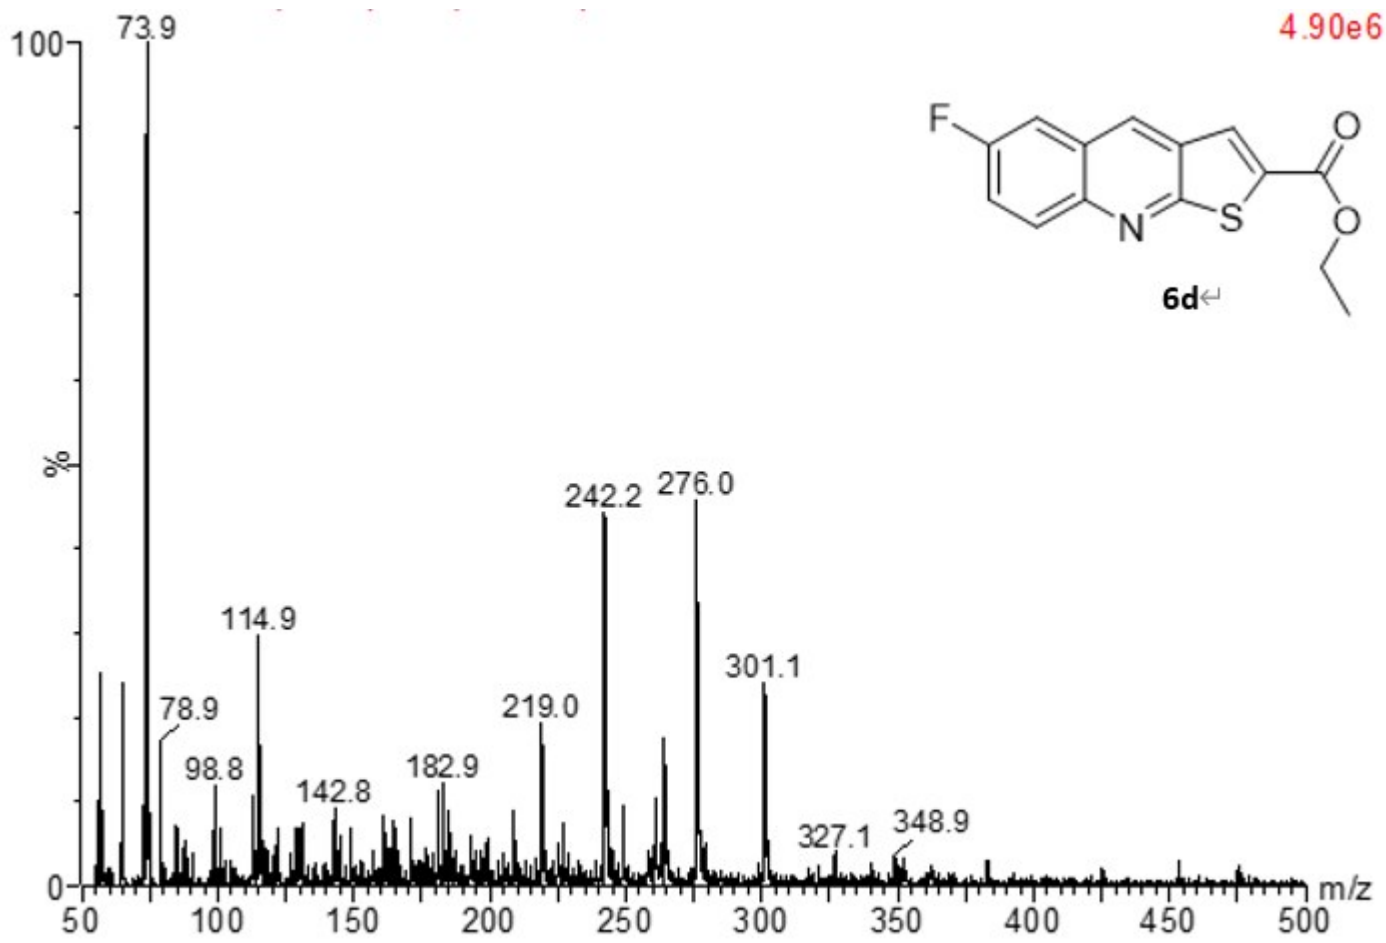

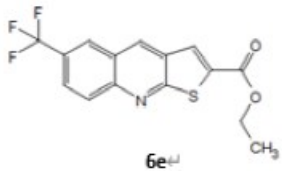

8.772  
8.329  
8.288  
8.265  
8.151  
7.967  
7.962  
7.944  
7.940  
7.523  
7.265  
7.000

4.505  
4.487  
4.469  
4.451

1.596  
1.481  
1.463  
1.445  
1.251

0.070  
-0.000

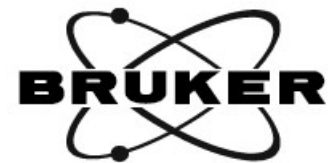

```

NAME      XY-325-20200115-HNMR
EXPNO     1
PROCNO    1
Date_     20200115
Time      10.46
INSTRUM   spect
PROBHD    5 mm PABBO BB-
PULPROG   zg30
TD         32768
SOLVENT   CDC13
NS         8
DS         0
SWH        8223.685 Hz
FIDRES     0.250967 Hz
AQ         1.9923444 sec
RG         203
DW         60.800 usec
DE         6.50 usec
TE         673.2 K
D1         1.00000000 sec
TDO       1
  
```

```

===== CHANNEL f1 =====
NUC1      1H
P1        11.90 usec
PL1       -2.30 dB
PL1W      18.55620956 W
SFO1      400.1424710 MHz
SI         32768
SF         400.1400077 MHz
WDW        EM
SSB        0
LB         0.30 Hz
GB         0
PC         1.00
  
```

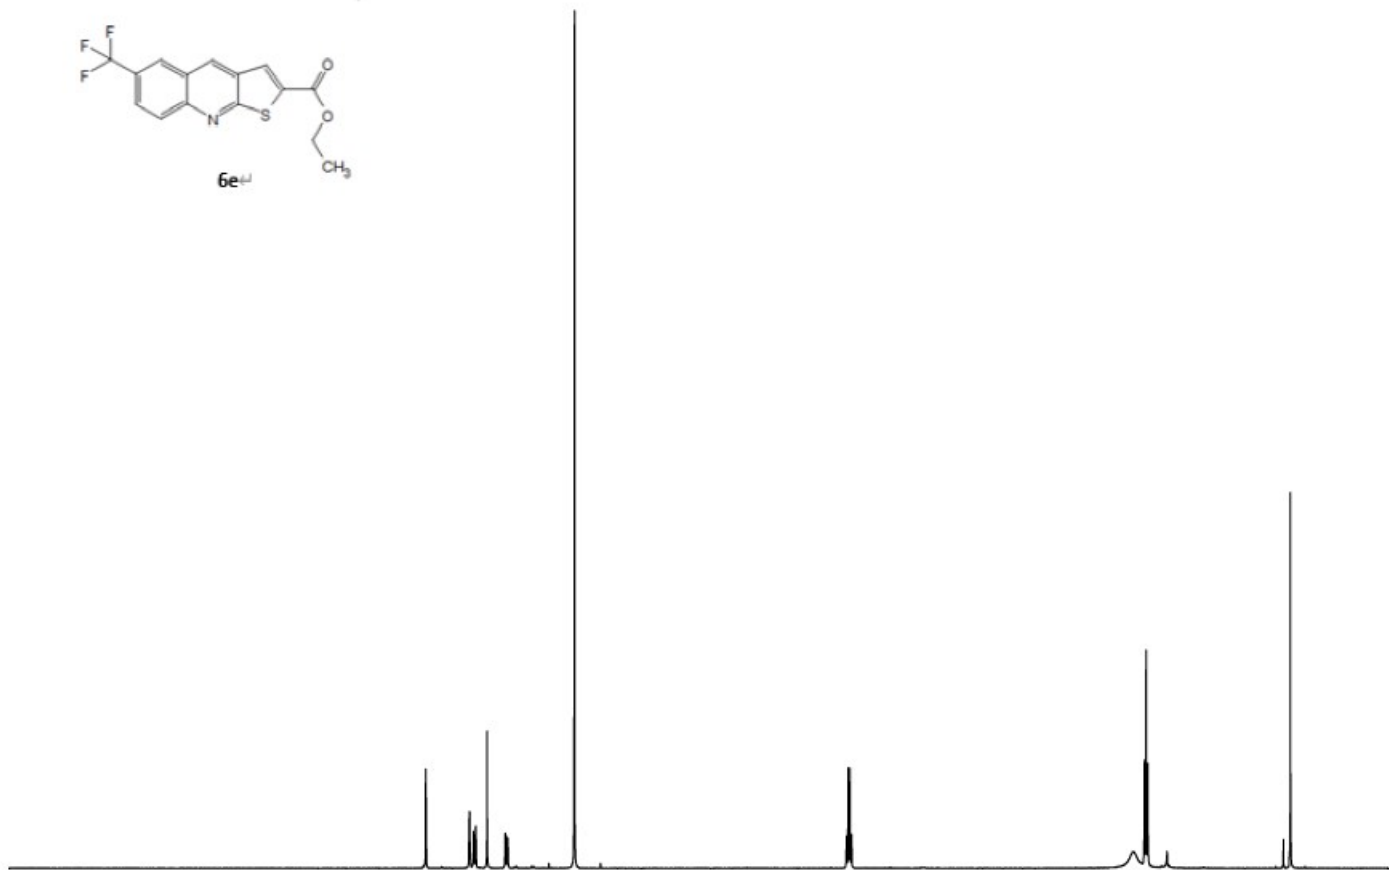

12 11 10 9 8 7 6 5 4 3 2 1 0 ppm

1.000  
0.961  
0.989  
0.997  
1.022

2.021

3.236

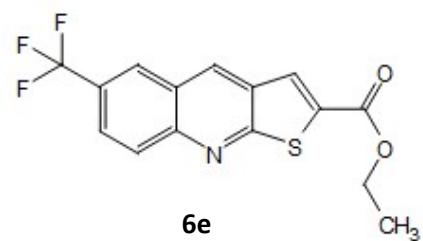

165.562  
162.067  
148.431  
136.359  
133.776  
131.997  
129.819  
127.894  
127.568  
127.373  
126.782  
126.738  
125.898  
125.876  
125.244  
124.397  
122.534

62.283

14.288

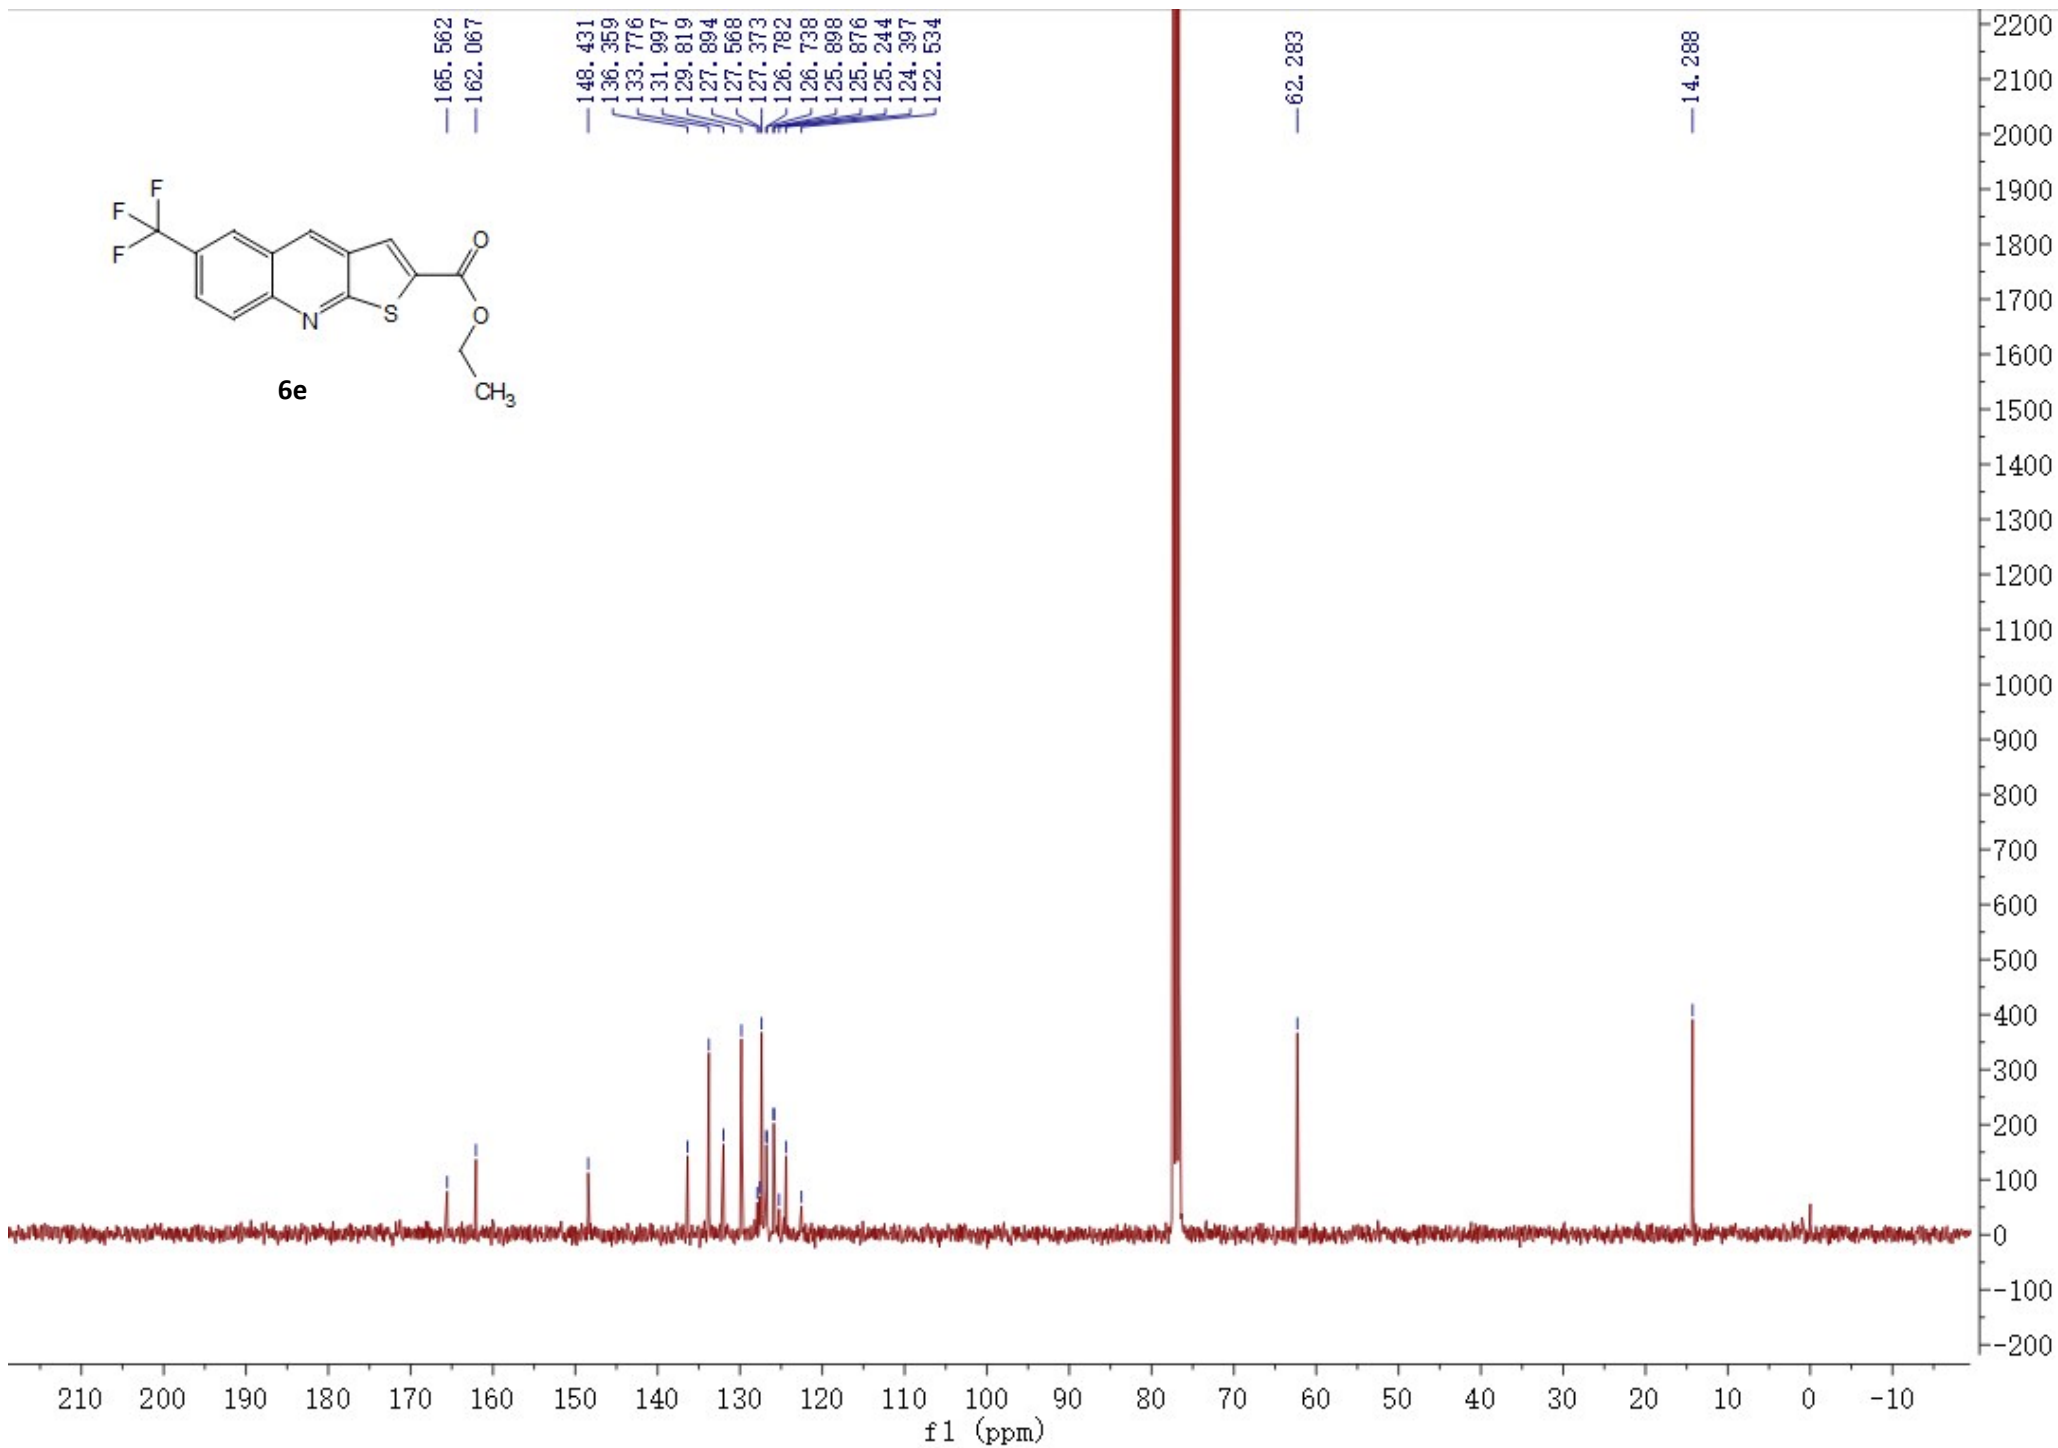

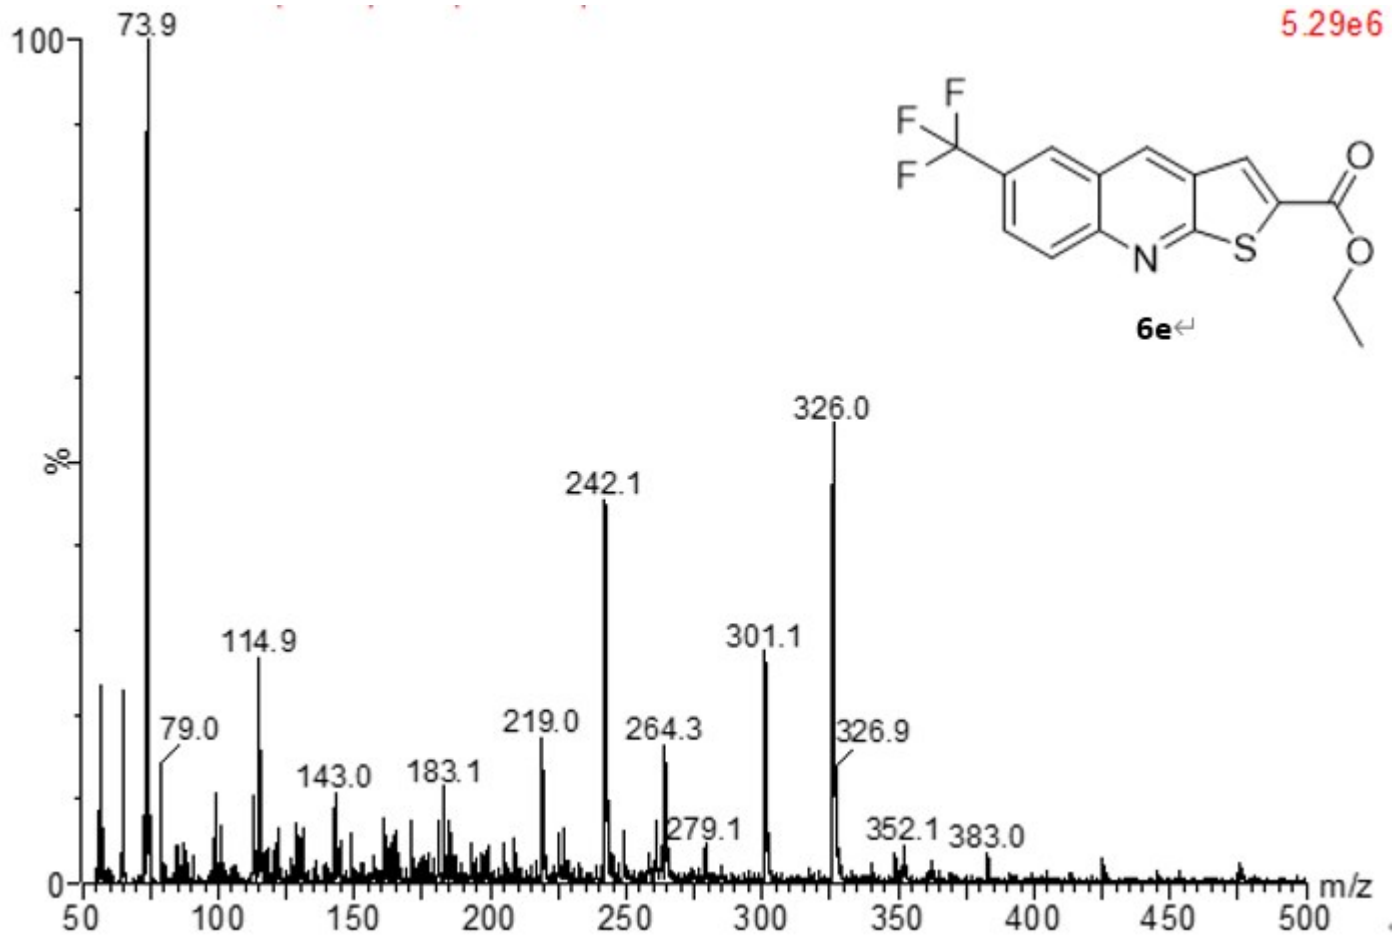

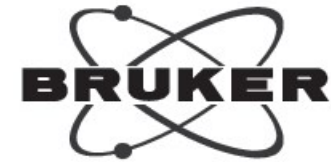

NAME XY-259-20200110-HNMR  
EXPNO 1  
PROCNO 1  
Date\_ 20200110  
Time\_ 10.58  
INSTRUM spect  
PROBHD 5 mm PABBO BB-  
PULPROG zg30  
TD 32768  
SOLVENT CDCl3  
NS 8  
DS 0  
SWH 8223.685 Hz  
FIDRES 0.250967 Hz  
AQ 1.9923444 sec  
RG 203  
DW 60.800 usec  
DE 6.50 usec  
TE 673.2 K  
D1 1.00000000 sec  
TDO 1

----- CHANNEL f1 -----  
NUC1 1H  
P1 11.90 usec  
PL1 -2.30 dB  
PL1W 18.55620956 W  
SFO1 400.1424710 MHz  
SI 32768  
SF 400.1400070 MHz  
WDW EM  
SSB 0  
LB 0.30 Hz  
GB 0  
PC 1.00

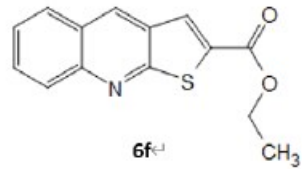

8.653  
8.163  
8.141  
8.094  
7.991  
7.970  
7.821  
7.818  
7.804  
7.801  
7.782  
7.780  
7.592  
7.573  
7.554  
7.267

4.484  
4.466  
4.448  
4.431

1.709  
1.470  
1.452  
1.434

--- -0.000

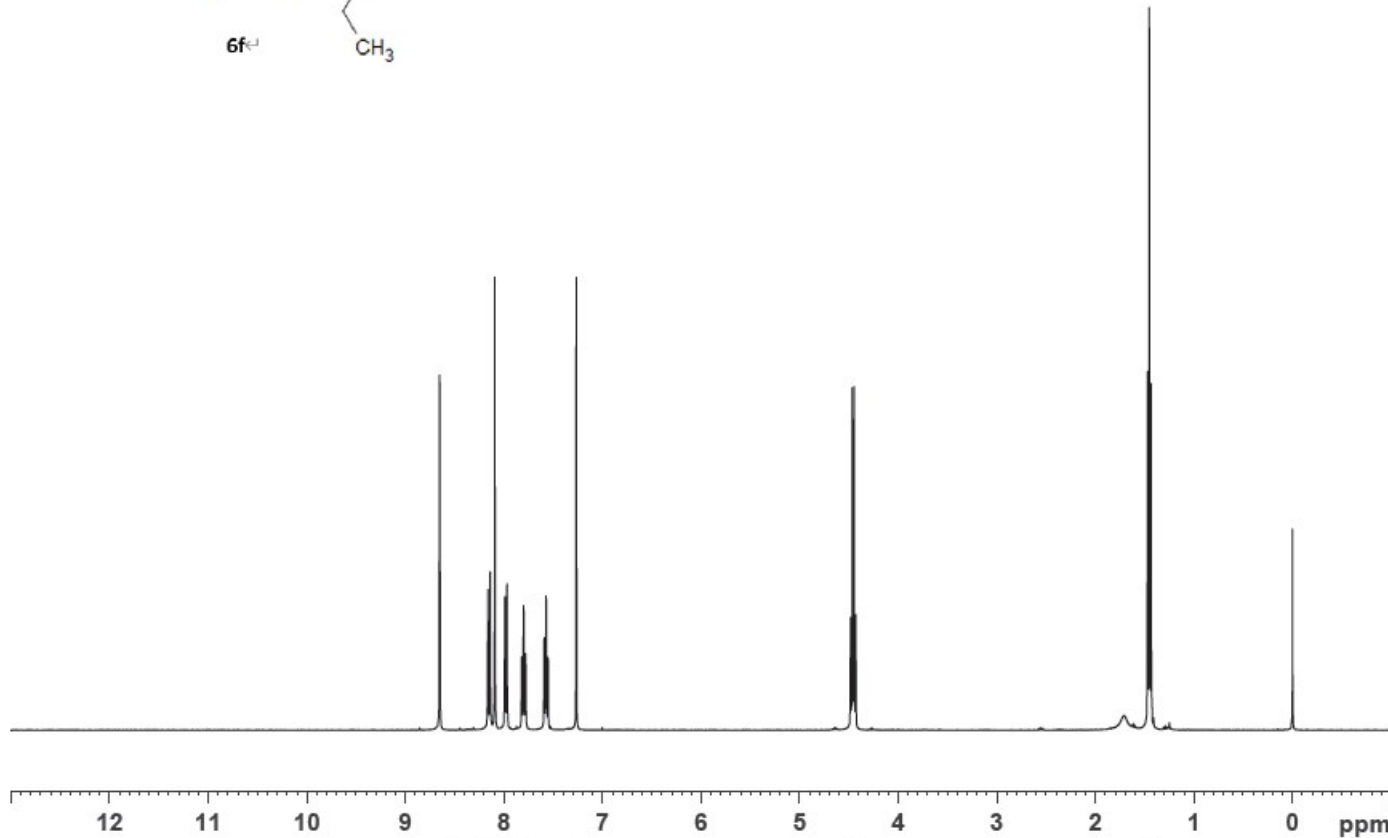

1.003  
1.000  
0.943  
1.012  
1.031  
1.042

1.984

3.028

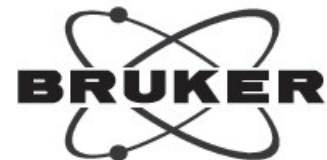

NAME XY-259-20200113-CNMR  
 EXPNO 1  
 PROCNO 1  
 Date\_ 20200114  
 Time\_ 1.13  
 INSTRUM spect  
 PROBHD 5 mm PABBO BB/  
 PULPROG zgpg30  
 TD 65536  
 SOLVENT CDCl3  
 NS 1024  
 DS 4  
 SWH 24038.461 Hz  
 FIDRES 0.366798 Hz  
 AQ 1.3631988 sec  
 RG 203  
 DW 20.800 usec  
 DE 6.50 usec  
 TE 298.0 K  
 D1 2.00000000 sec  
 D11 0.03000000 sec  
 TD0 1

===== CHANNEL f1 =====  
 SFO1 100.6253441 MHz  
 NUC1 13C  
 P1 11.00 usec  
 SI 32768  
 SF 100.6152830 MHz  
 WDW EM  
 SSB 0  
 LB 1.00 Hz  
 GB 0  
 PC 1.40

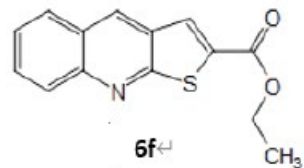

163.561  
 162.416  
 148.113  
 135.069  
 133.013  
 131.173  
 130.582  
 128.672  
 128.475  
 127.771  
 125.881  
 125.772

77.343  
 77.228  
 77.025  
 76.707

62.063

14.322

-0.006

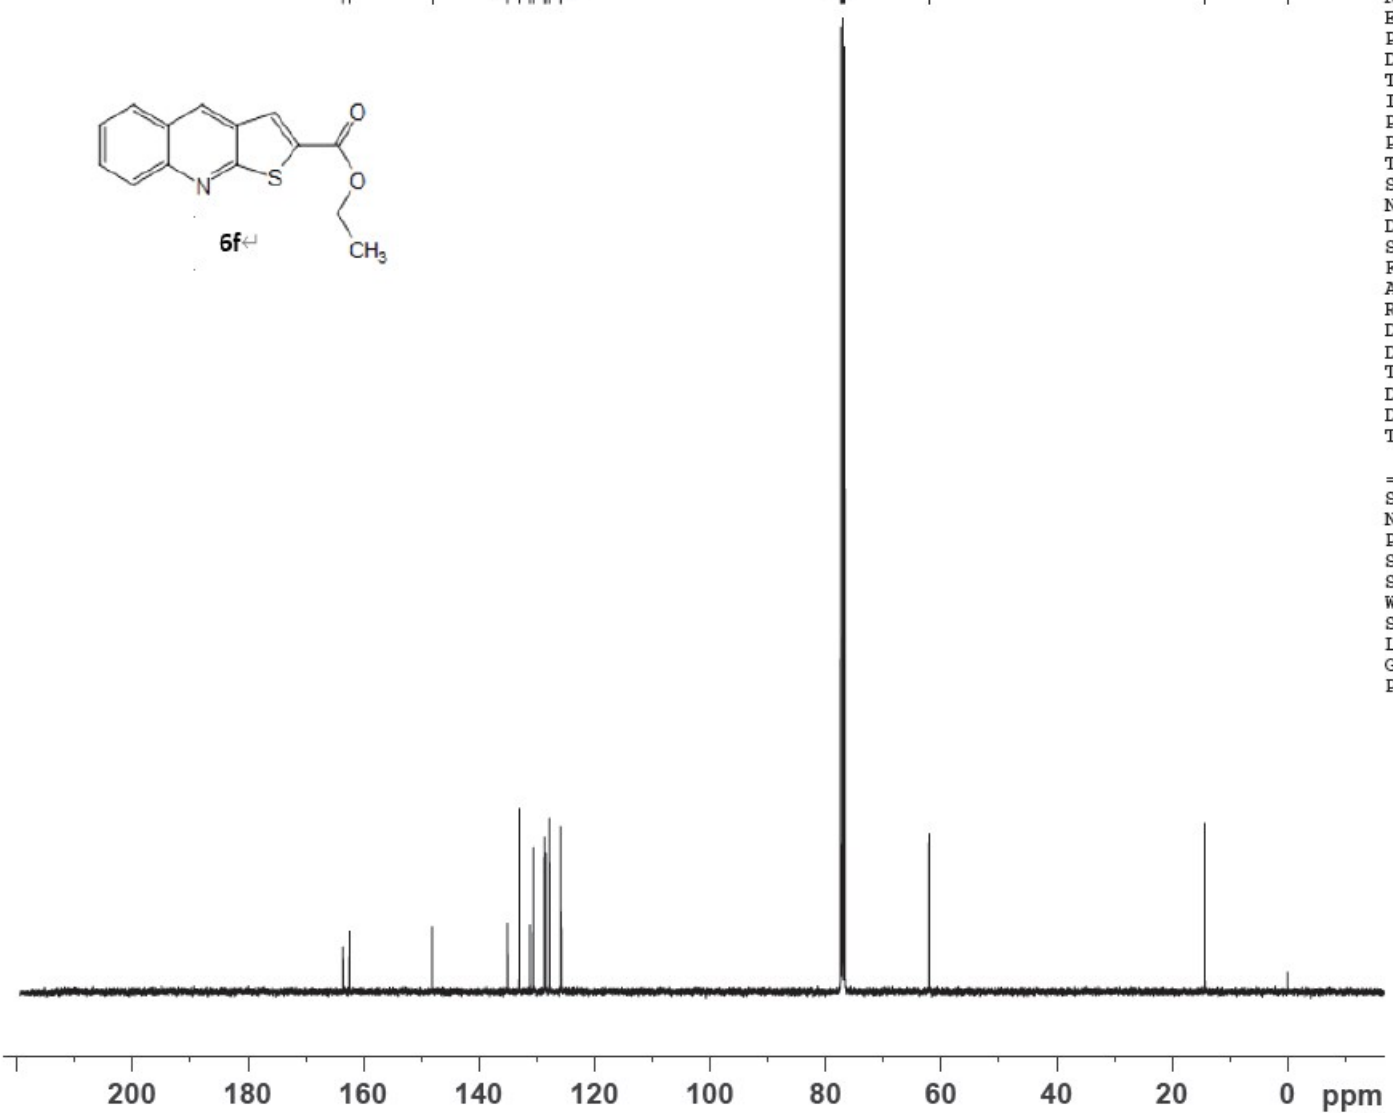



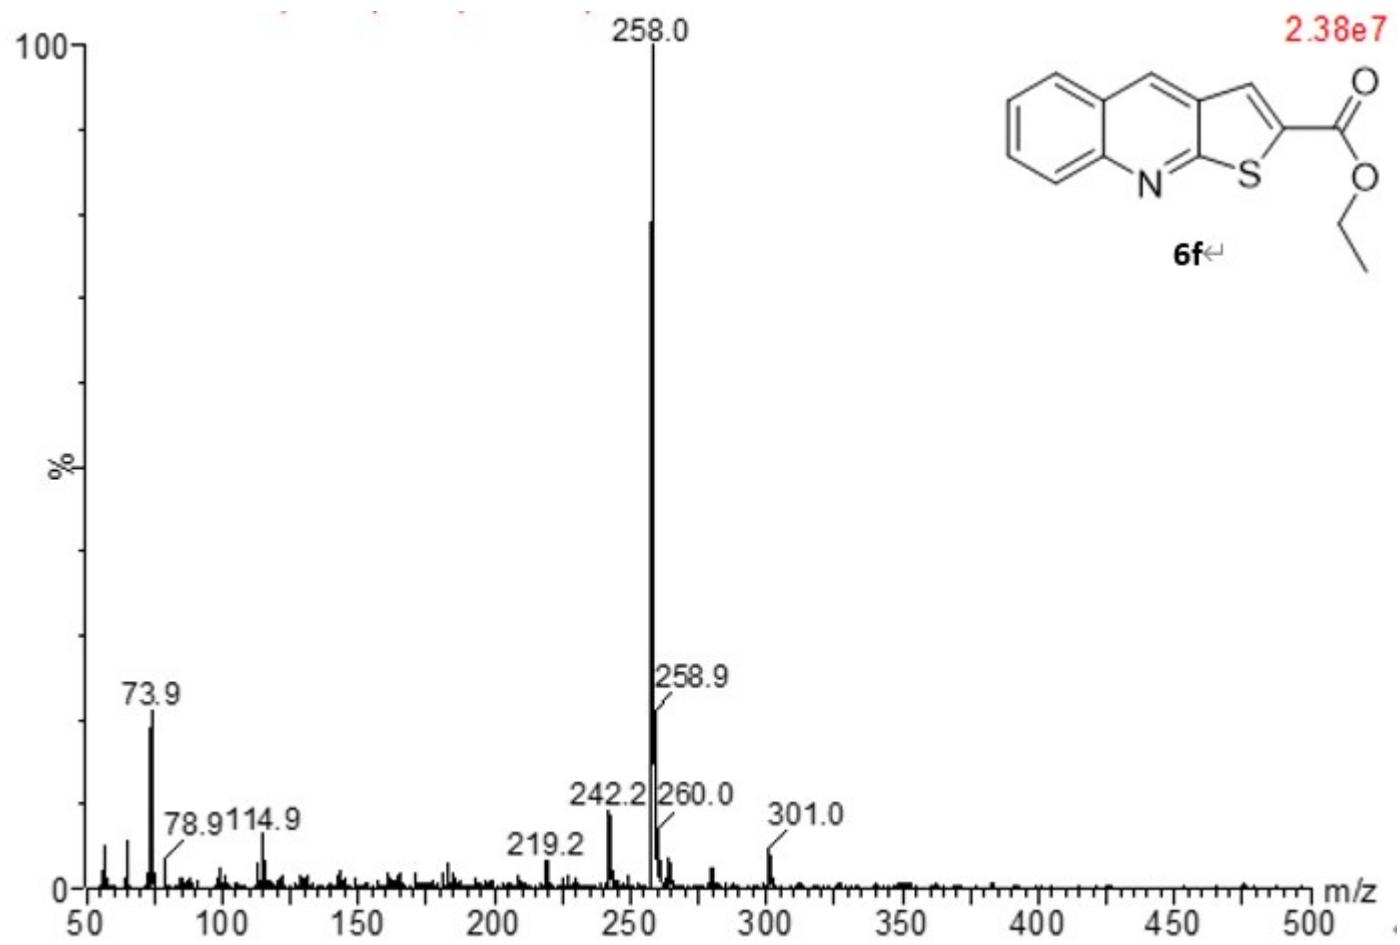

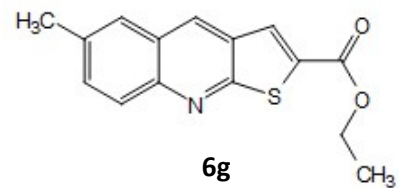

8.56  
8.09  
8.06  
8.04  
7.73  
7.65  
7.64  
7.63  
7.62

4.48  
4.46  
4.44  
4.43

2.58

1.47  
1.45  
1.43

1500  
1400  
1300  
1200  
1100  
1000  
900  
800  
700  
600  
500  
400  
300  
200  
100  
0  
-100

0.96  
0.91  
0.90  
0.96  
0.96

2.00

2.94

2.95

.0 12.0 11.0 10.0 9.0 8.0 7.0 6.0 5.0 4.0 3.0 2.0 1.0 0.0 -1.0

f1 (ppm)

V

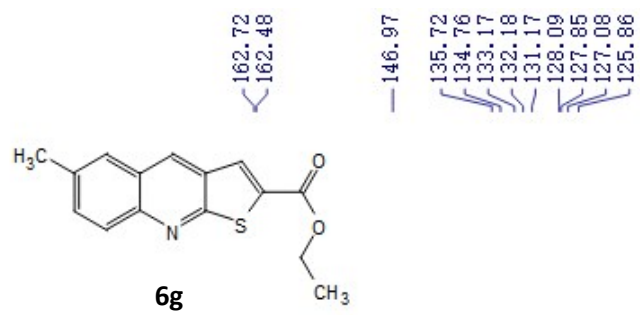

162.72  
 162.48  
 146.97  
 135.72  
 134.76  
 133.17  
 132.18  
 131.17  
 128.09  
 127.85  
 127.08  
 125.86

62.00

21.61

14.31

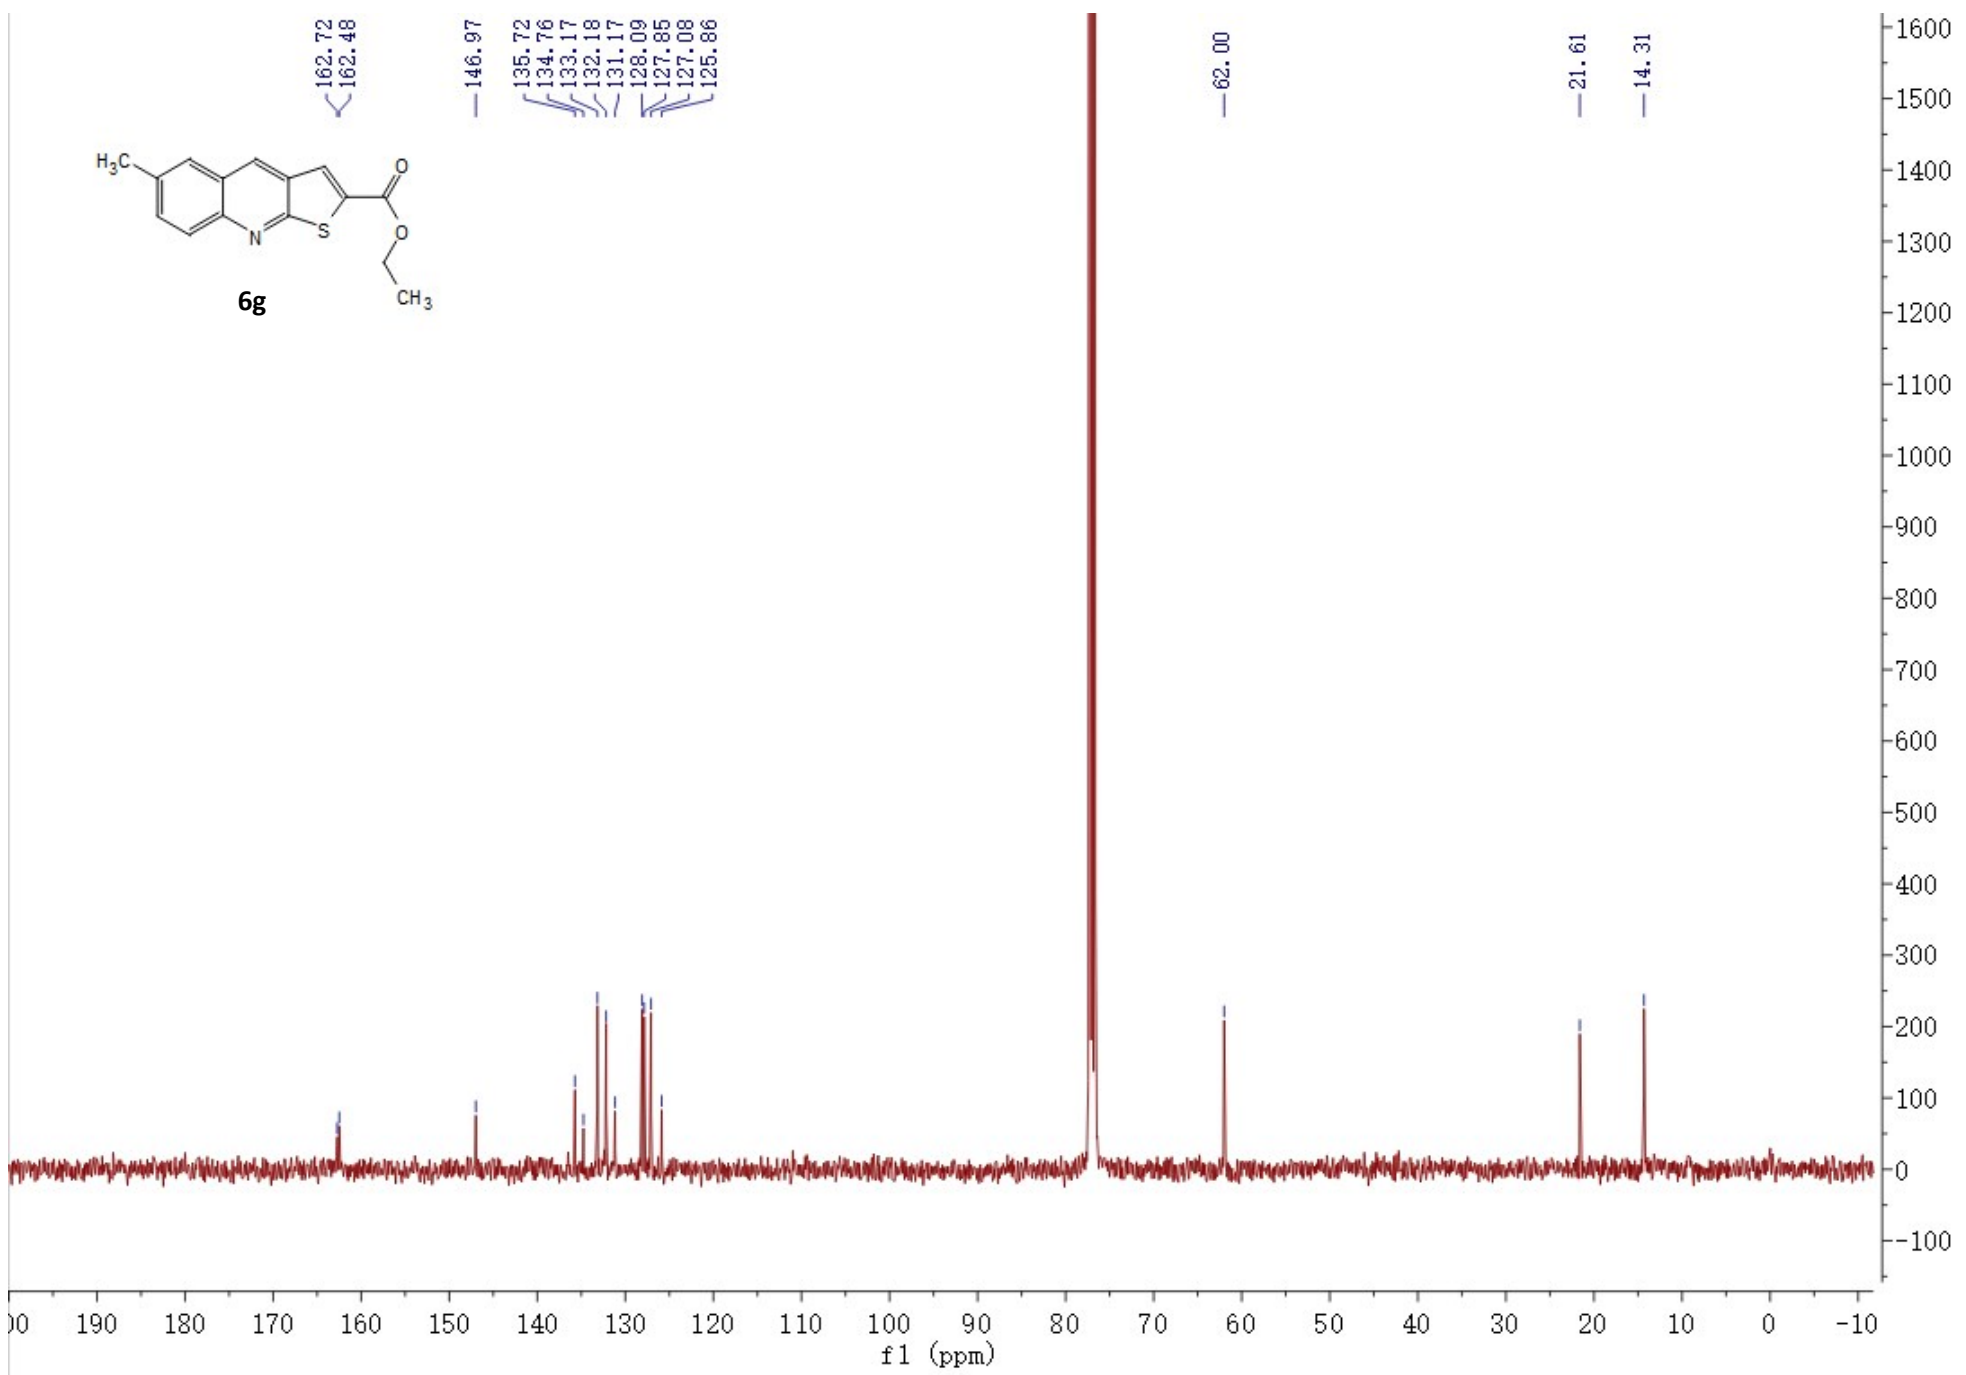

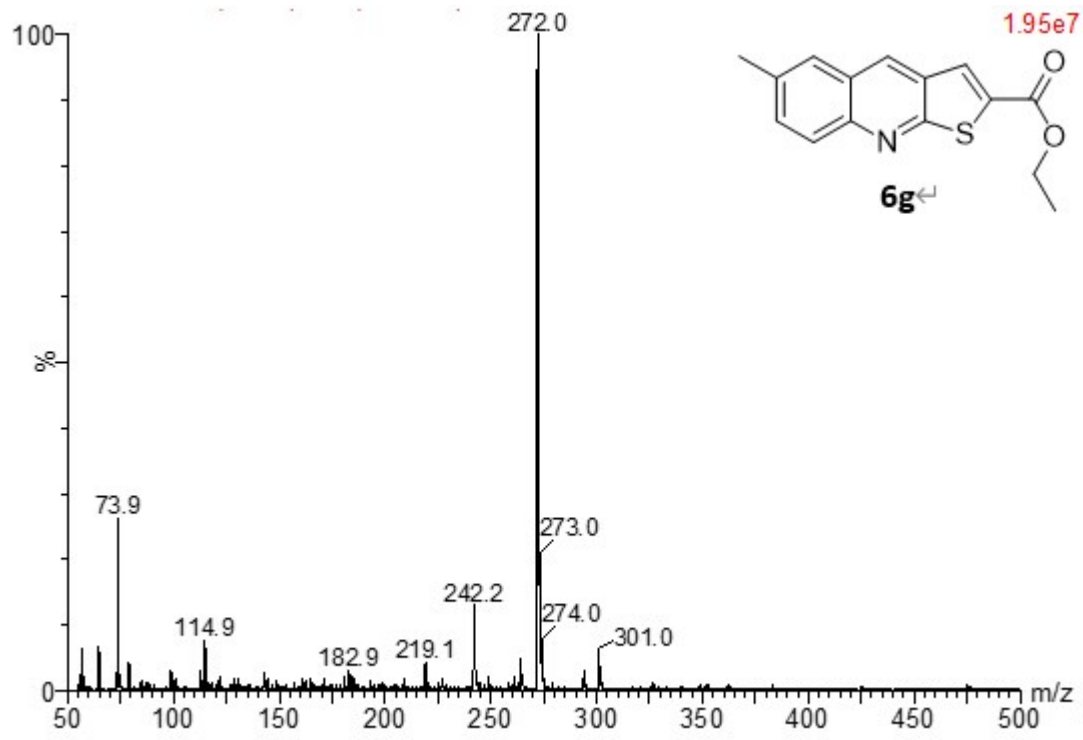

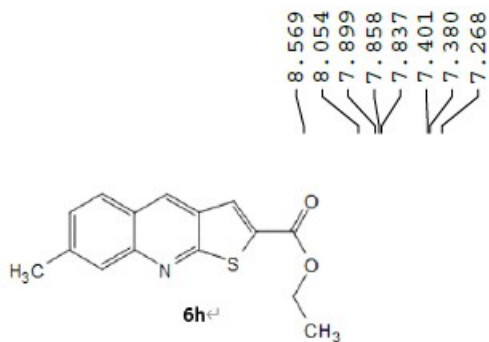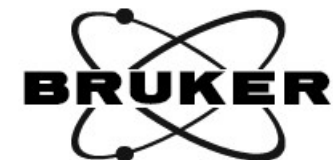

```

NAME      XY-287-3-20200110-HNMR
EXPNO     1
PROCNO    1
Date_     20200110
Time_     10.55
INSTRUM   spect
PROBHD    5 mm PABBO BB-
PULPROG   zg30
TD         32768
SOLVENT   CDCl3
NS         8
DS         0
SWH       8223.685 Hz
FIDRES    0.250967 Hz
AQ         1.9923444 sec
RG         203
DW         60.800 usec
DE         6.50 usec
TE         673.2 K
D1         1.00000000 sec
TD0        1
  
```

```

===== CHANNEL f1 =====
NUC1      1H
P1        11.90 usec
PL1       -2.30 dB
PL1W      18.55620956 W
SFO1      400.1424710 MHz
SI         32768
SF         400.1400067 MHz
WDW       EM
SSB       0
LB         0.30 Hz
GB         0
PC         1.00
  
```

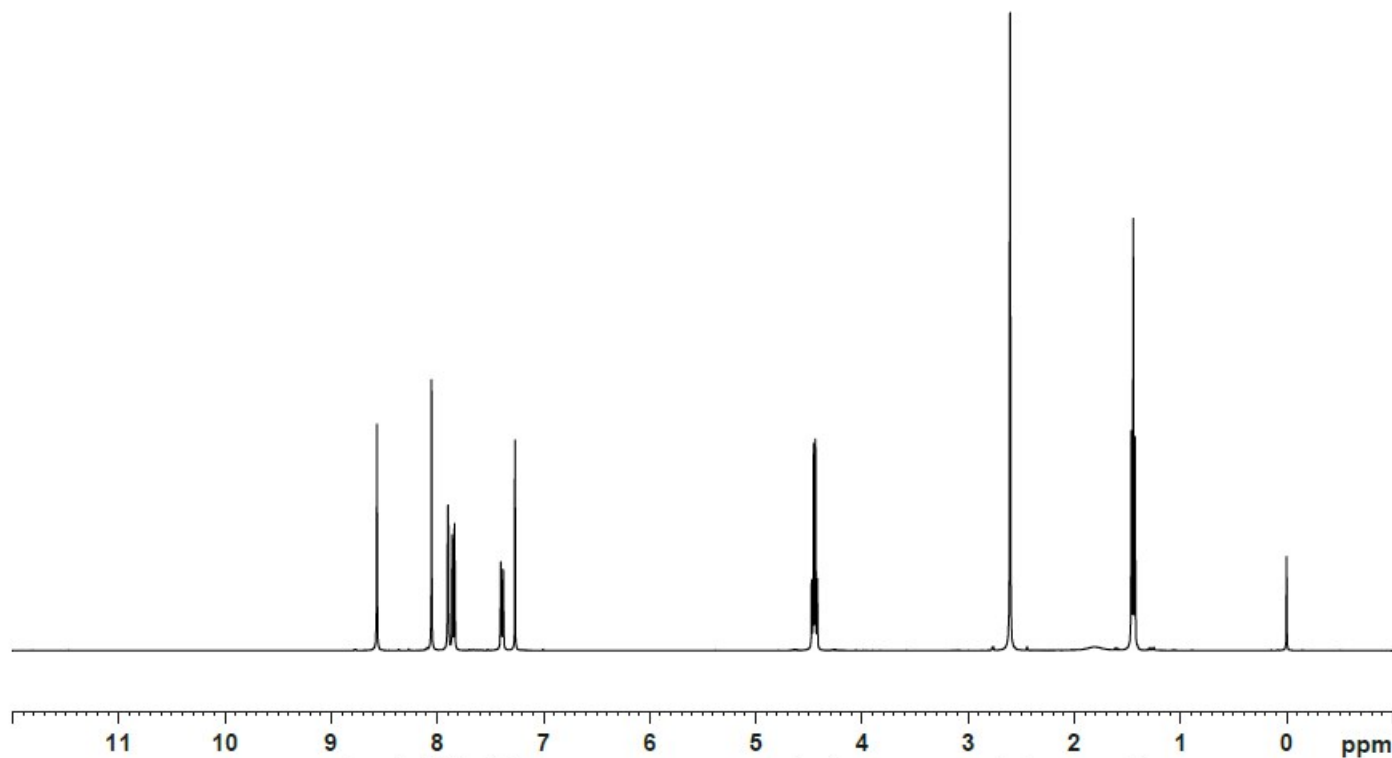

$1.000$   
 $0.973$   
 $0.988$   
 $0.971$   
 $0.990$

$2.018$

$3.030$

$3.035$

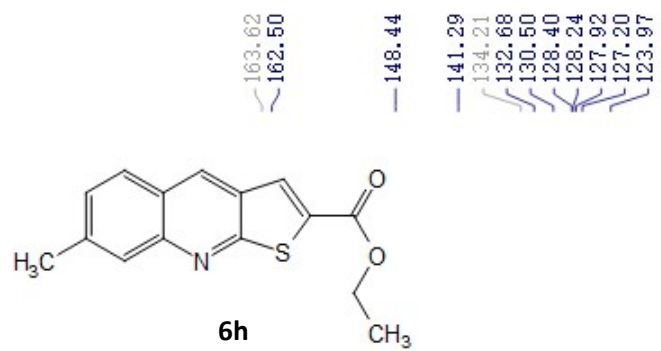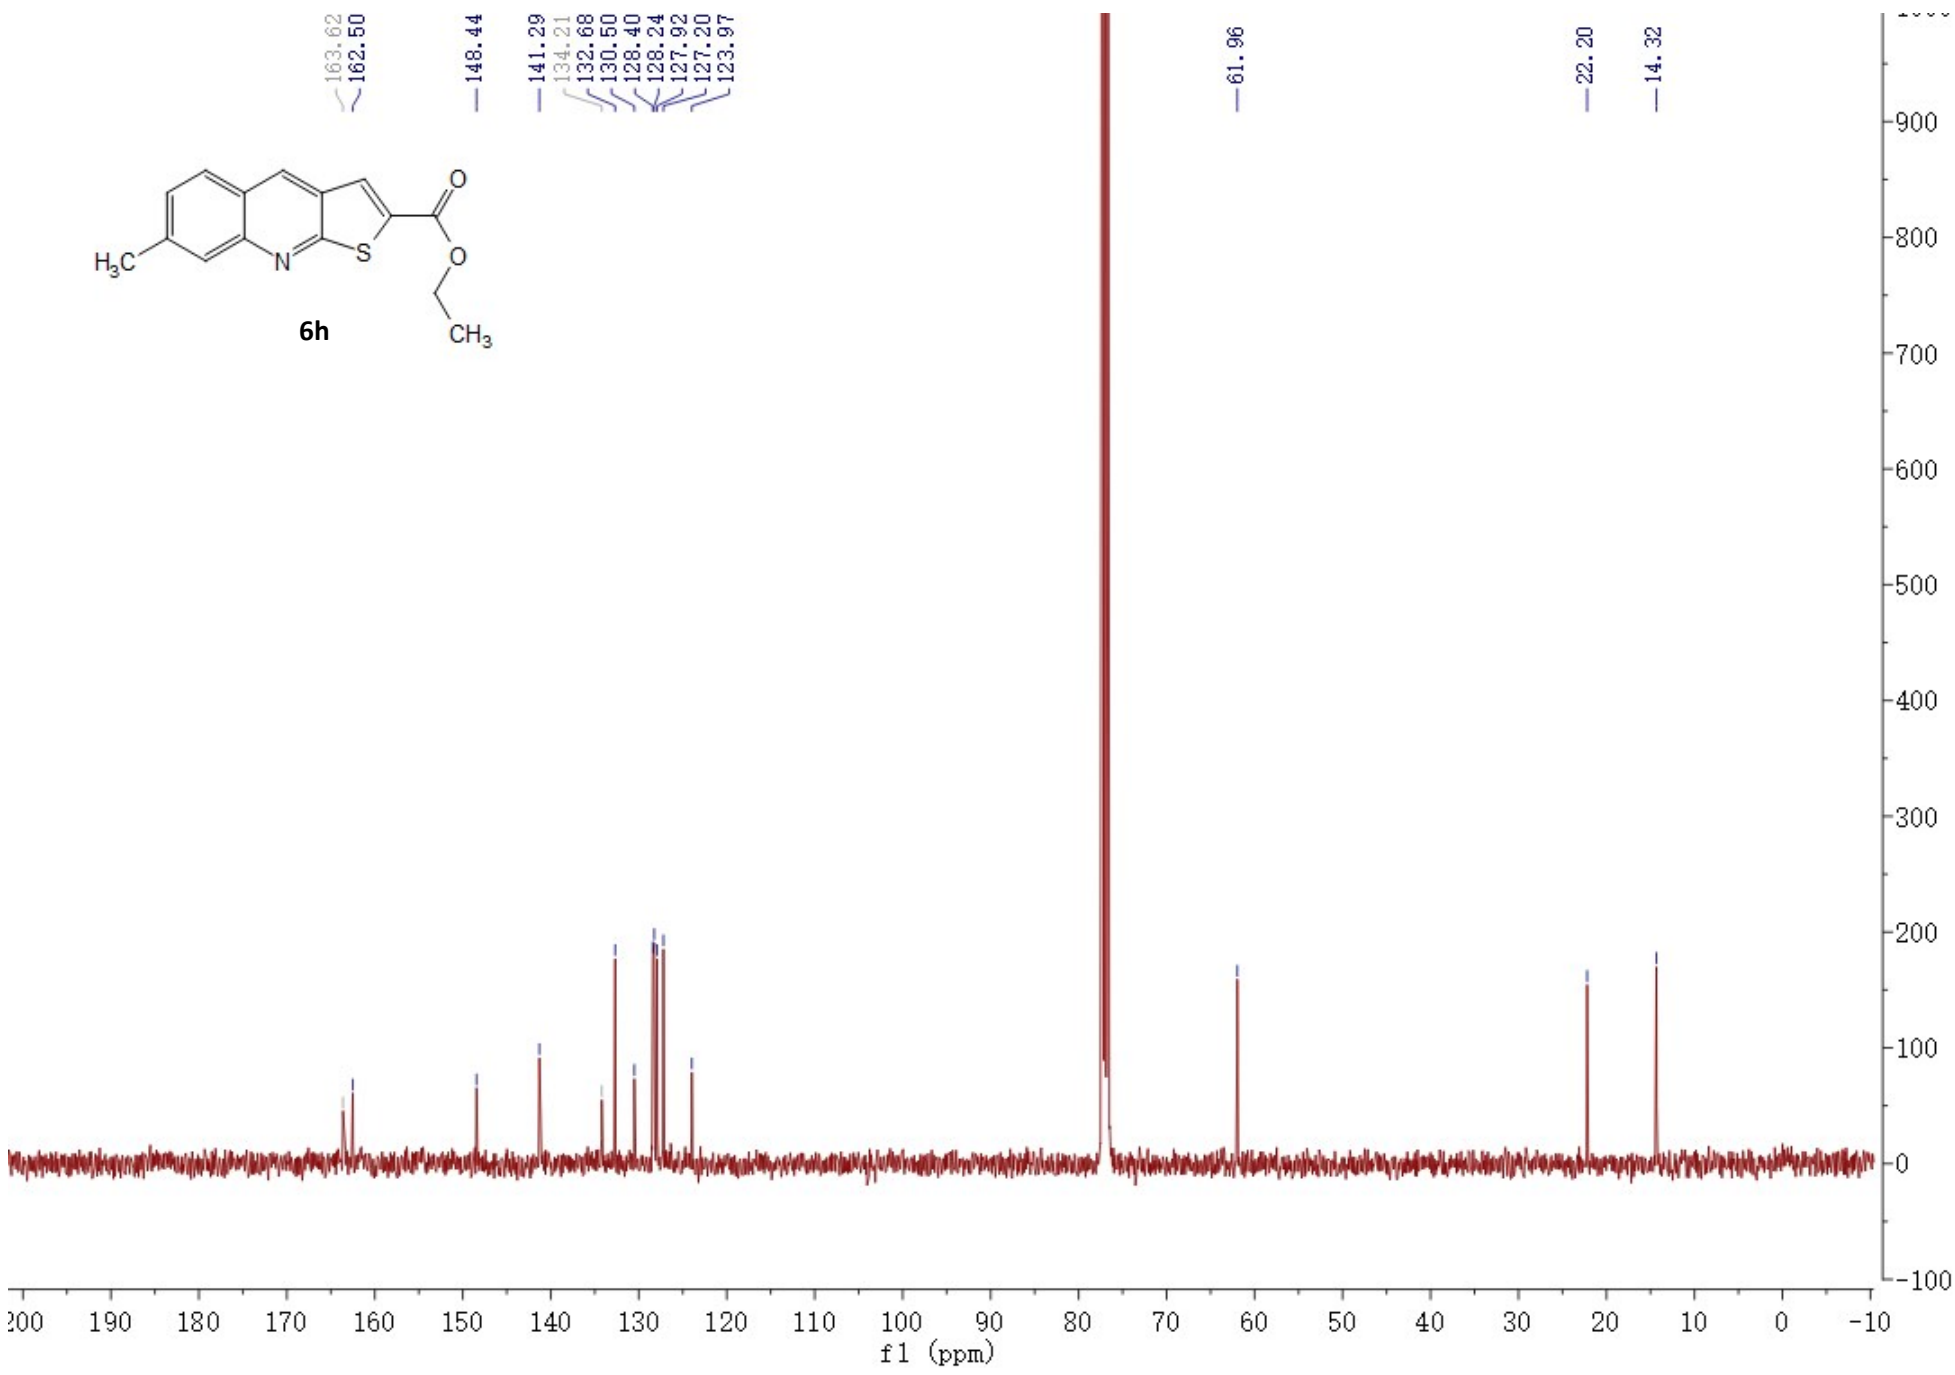

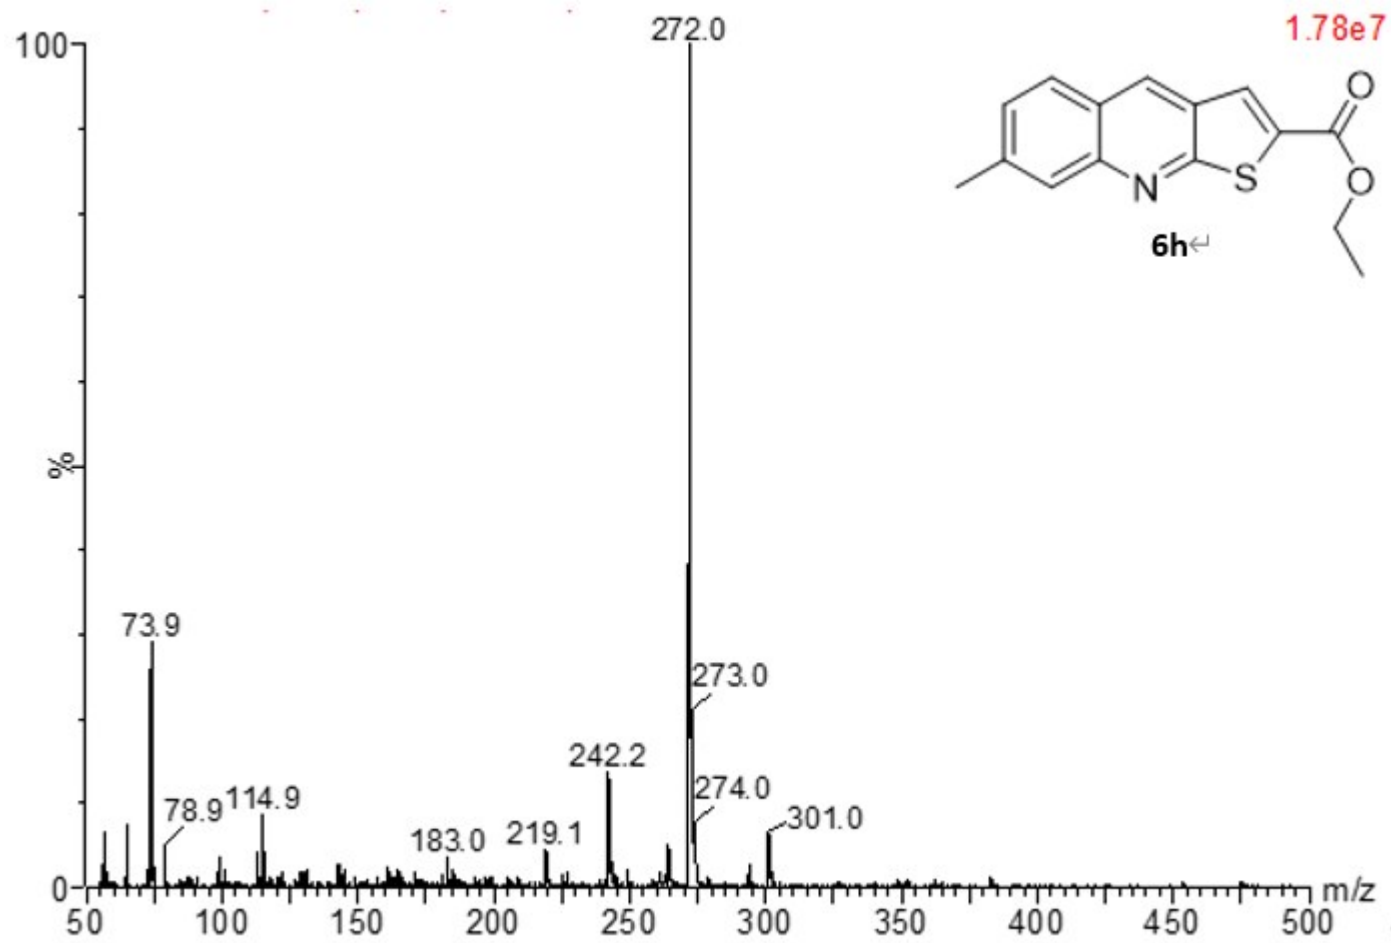

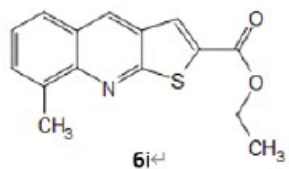

8.632  
8.102  
7.838  
7.818  
7.653  
7.636  
7.521  
7.482  
7.464  
7.462  
7.444  
7.262  
7.236  
6.998

4.487  
4.469  
4.451  
4.433

2.883

1.569  
1.471  
1.453  
1.435  
1.427  
1.412

0.007  
-0.000  
-0.008

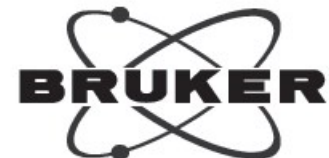

```

NAME      XY-271-20200107-HNMR
EXPNO     1
PROCNO    1
Date_     20200107
Time      12.07
INSTRUM   spect
PROBHD    5 mm PABBO BB-
PULPROG   zg30
TD        32768
SOLVENT   CDC13
NS        8
DS        0
SWH       8223.685 Hz
FIDRES    0.250967 Hz
AQ        1.9923444 sec
RG        203
DW        60.800 usec
DE        6.50 usec
TE        673.2 K
D1        1.00000000 sec
TDO       1
  
```

```

===== CHANNEL f1 =====
NUC1      1H
P1        11.90 usec
PL1       -2.30 dB
PL1W      18.55620956 W
SFO1     400.1424710 MHz
SI        32768
SF        400.1400089 MHz
WDW       EM
SSB       0
LB        0.30 Hz
GB        0
PC        1.00
  
```

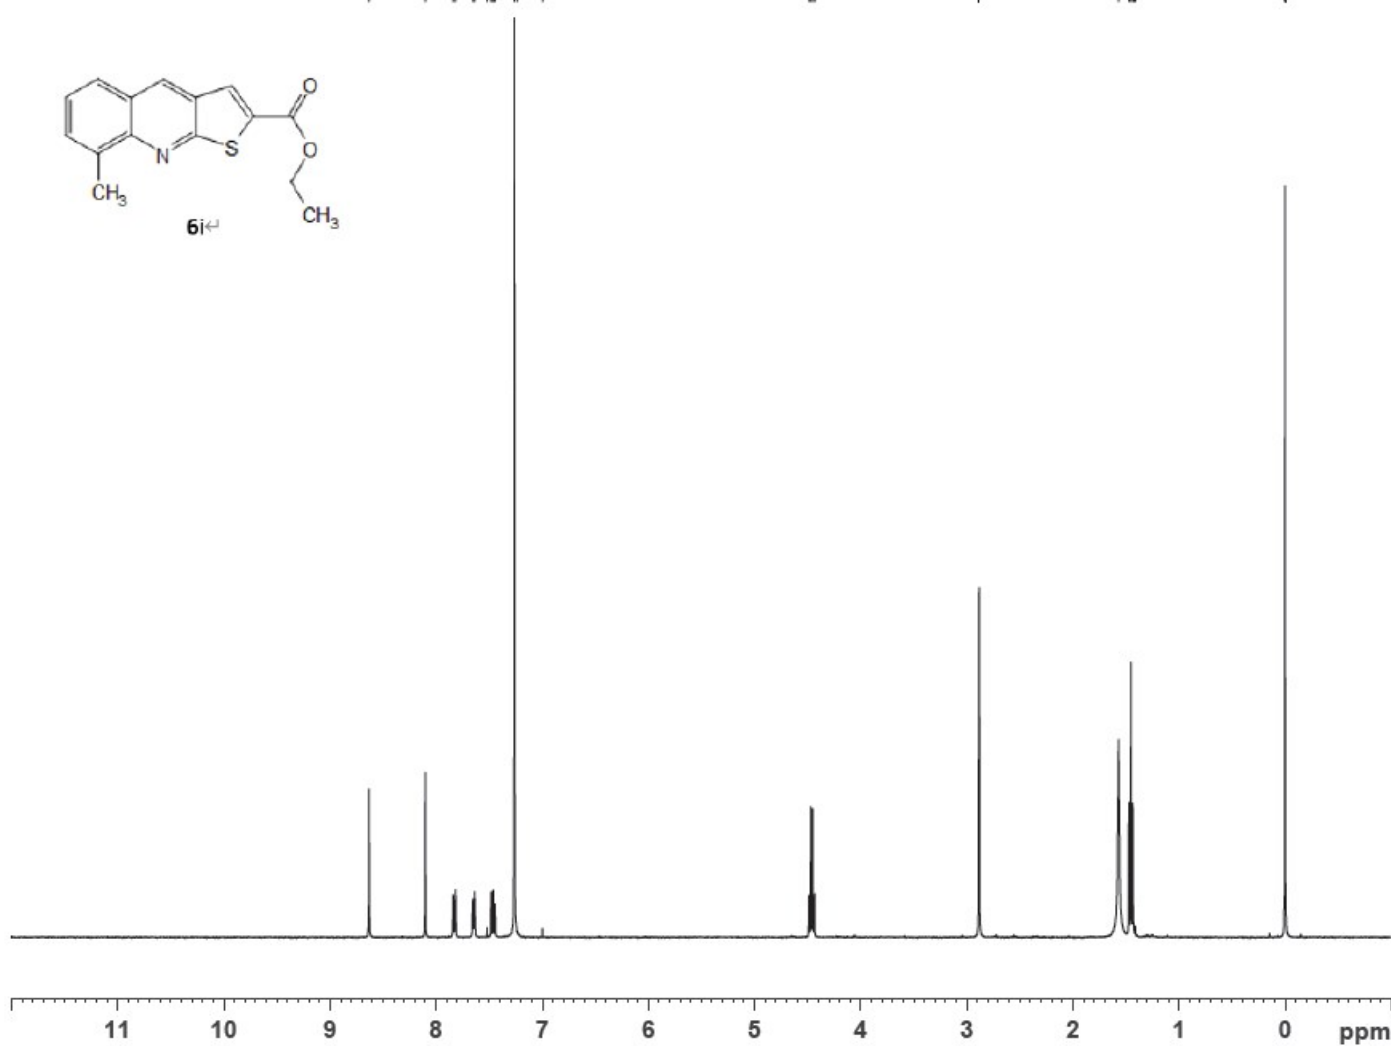

0.962  
0.932  
1.000  
0.975  
0.985

2.009

2.981

3.304



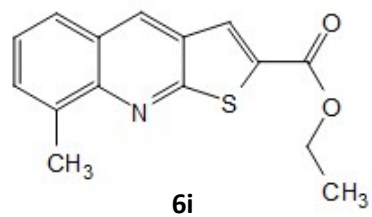

162.70  
162.56

147.50  
136.48  
134.85  
133.09  
130.79  
130.34  
127.73  
126.61  
125.72  
125.59

61.96

18.33  
14.32

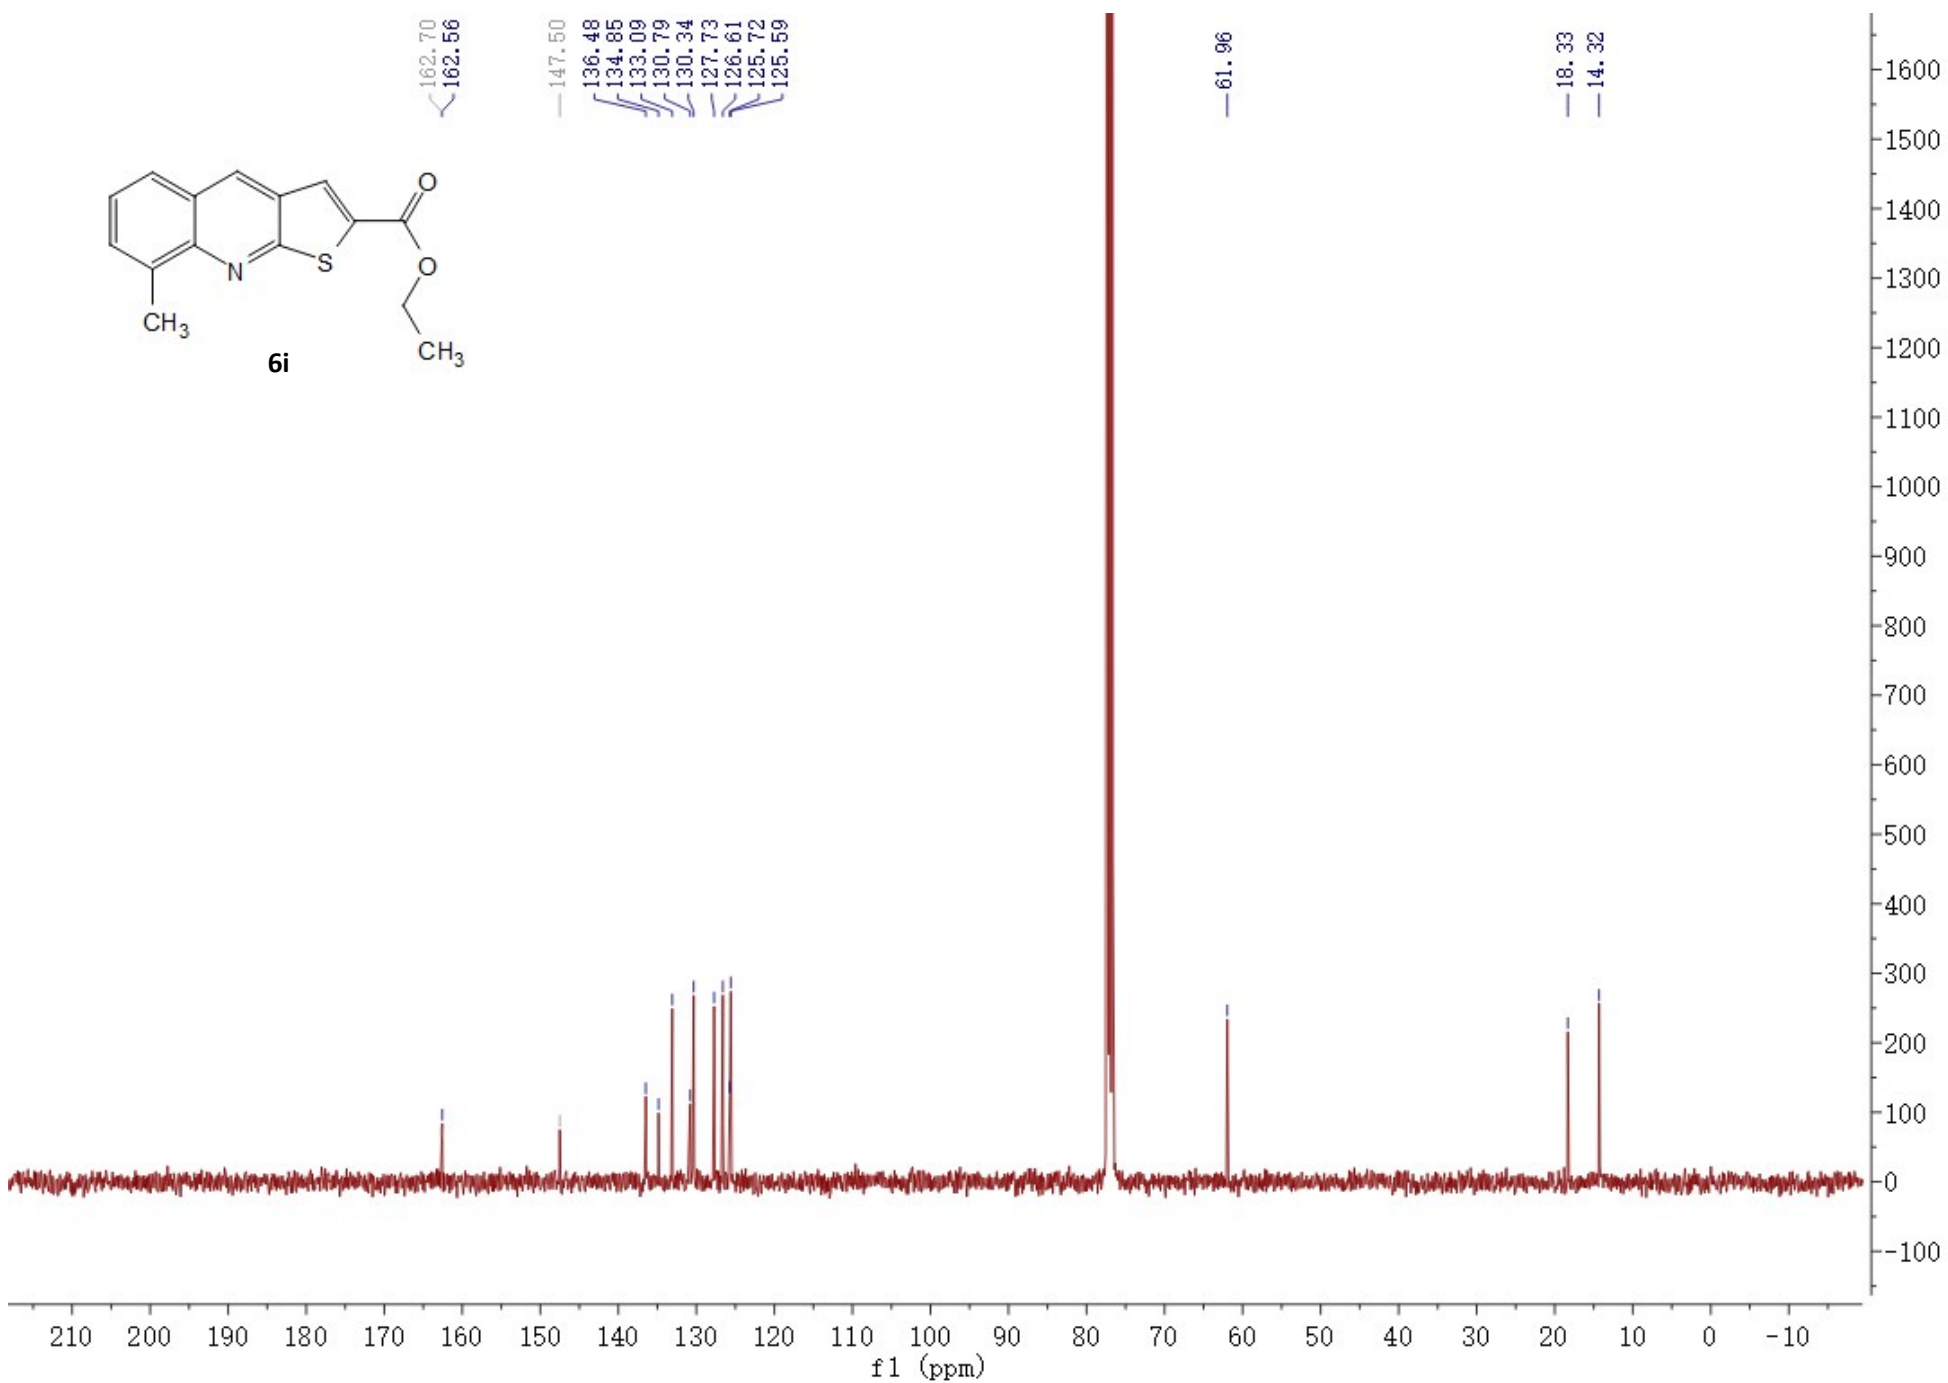

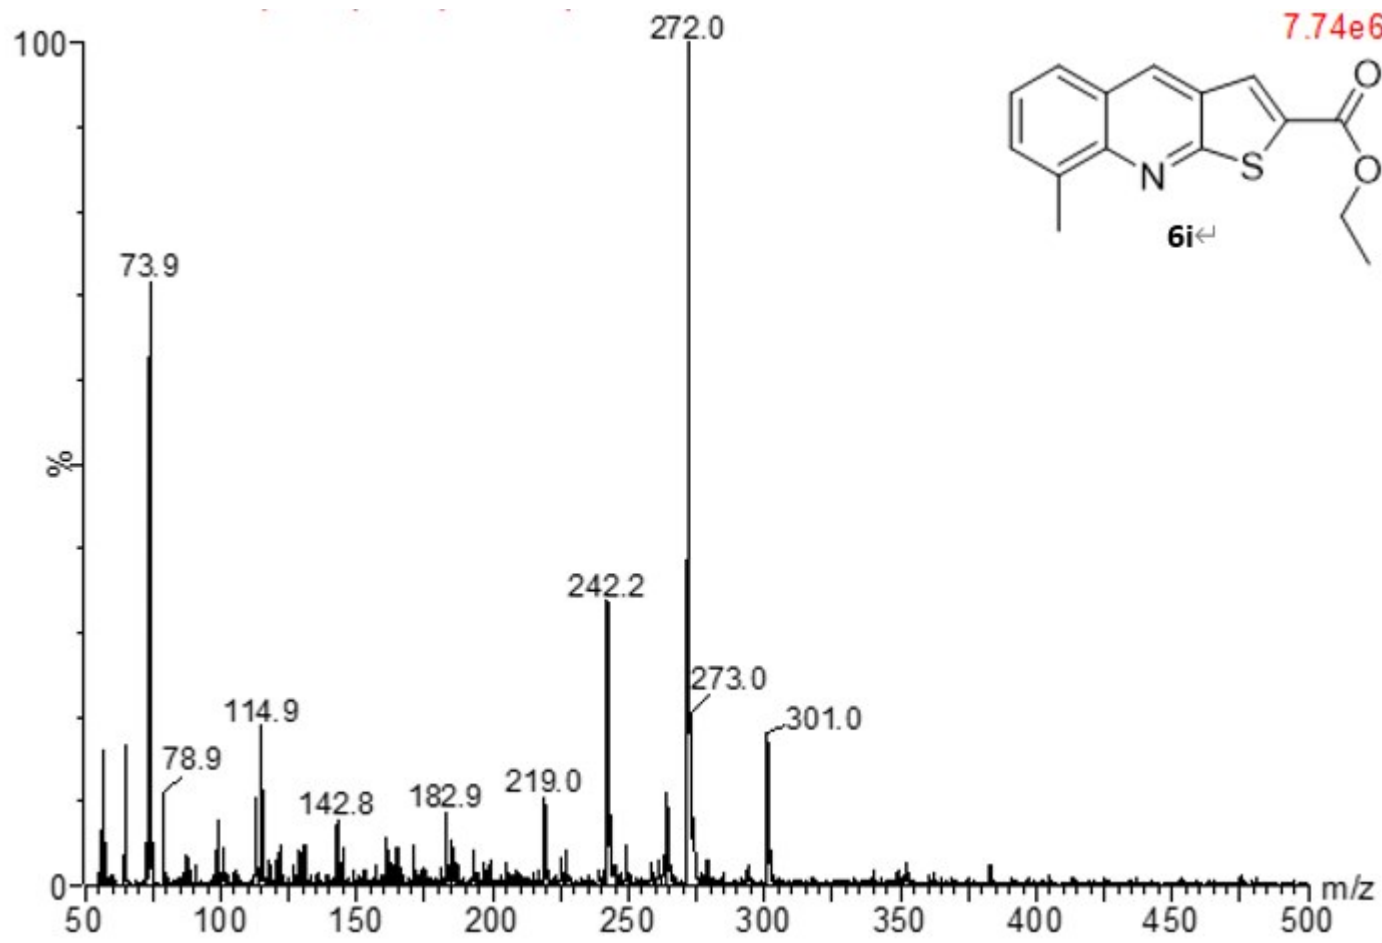

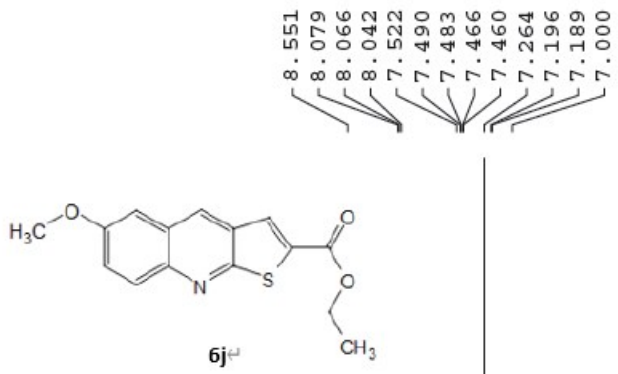

8.551  
8.079  
8.066  
8.042  
7.522  
7.490  
7.483  
7.466  
7.460  
7.264  
7.196  
7.189  
7.000

4.482  
4.464  
4.447  
4.429  
3.973

1.583  
1.468  
1.450  
1.432  
1.310  
1.264  
1.253  
0.070  
-0.000

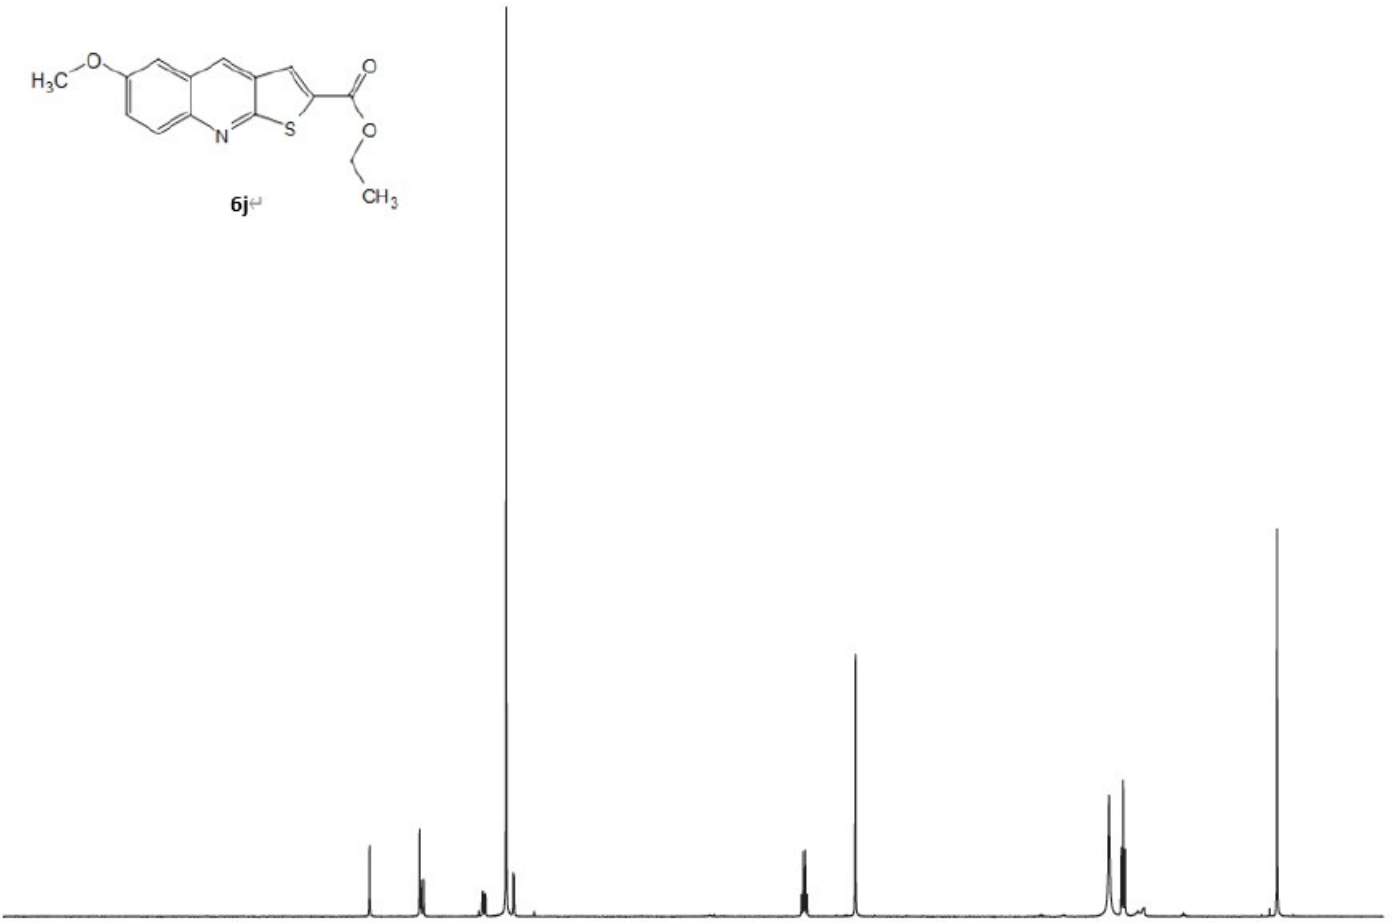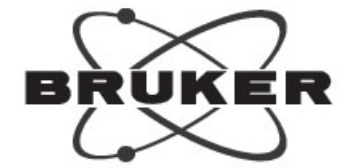

```

NAME      XY-287-3-20200109-HNMR
EXPNO     1
PROCNO    1
Date_     20200109
Time      10.40
INSTRUM   spect
PROBHD    5 mm PABBO BB-
PULPROG   zg30
TD         32768
SOLVENT   CDCl3
NS         8
DS         0
SWH       8223.685 Hz
FIDRES    0.250967 Hz
AQ         1.9923444 sec
RG         203
DW         60.800 usec
DE         6.50 usec
TE         673.2 K
D1         1.00000000 sec
TDO        1
  
```

```

===== CHANNEL f1 =====
NUC1      1H
P1         11.90 usec
PL1        -2.30 dB
PL1W      18.55620956 W
SFO1      400.1424710 MHz
SI         32768
SF         400.1400083 MHz
WDW        EM
SSB         0
LB         0.30 Hz
GB         0
PC         1.00
  
```

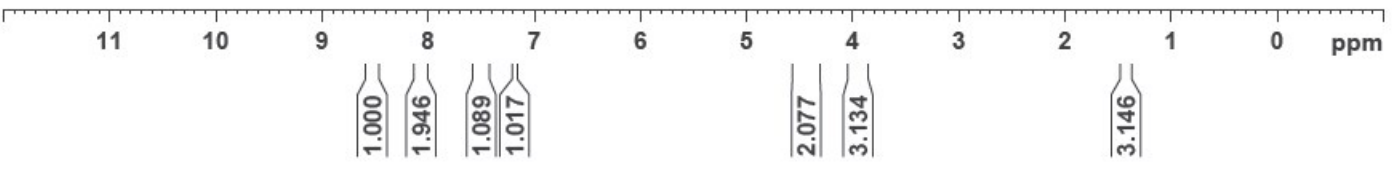

1.000  
1.946  
1.089  
1.017

2.077  
3.134

3.146

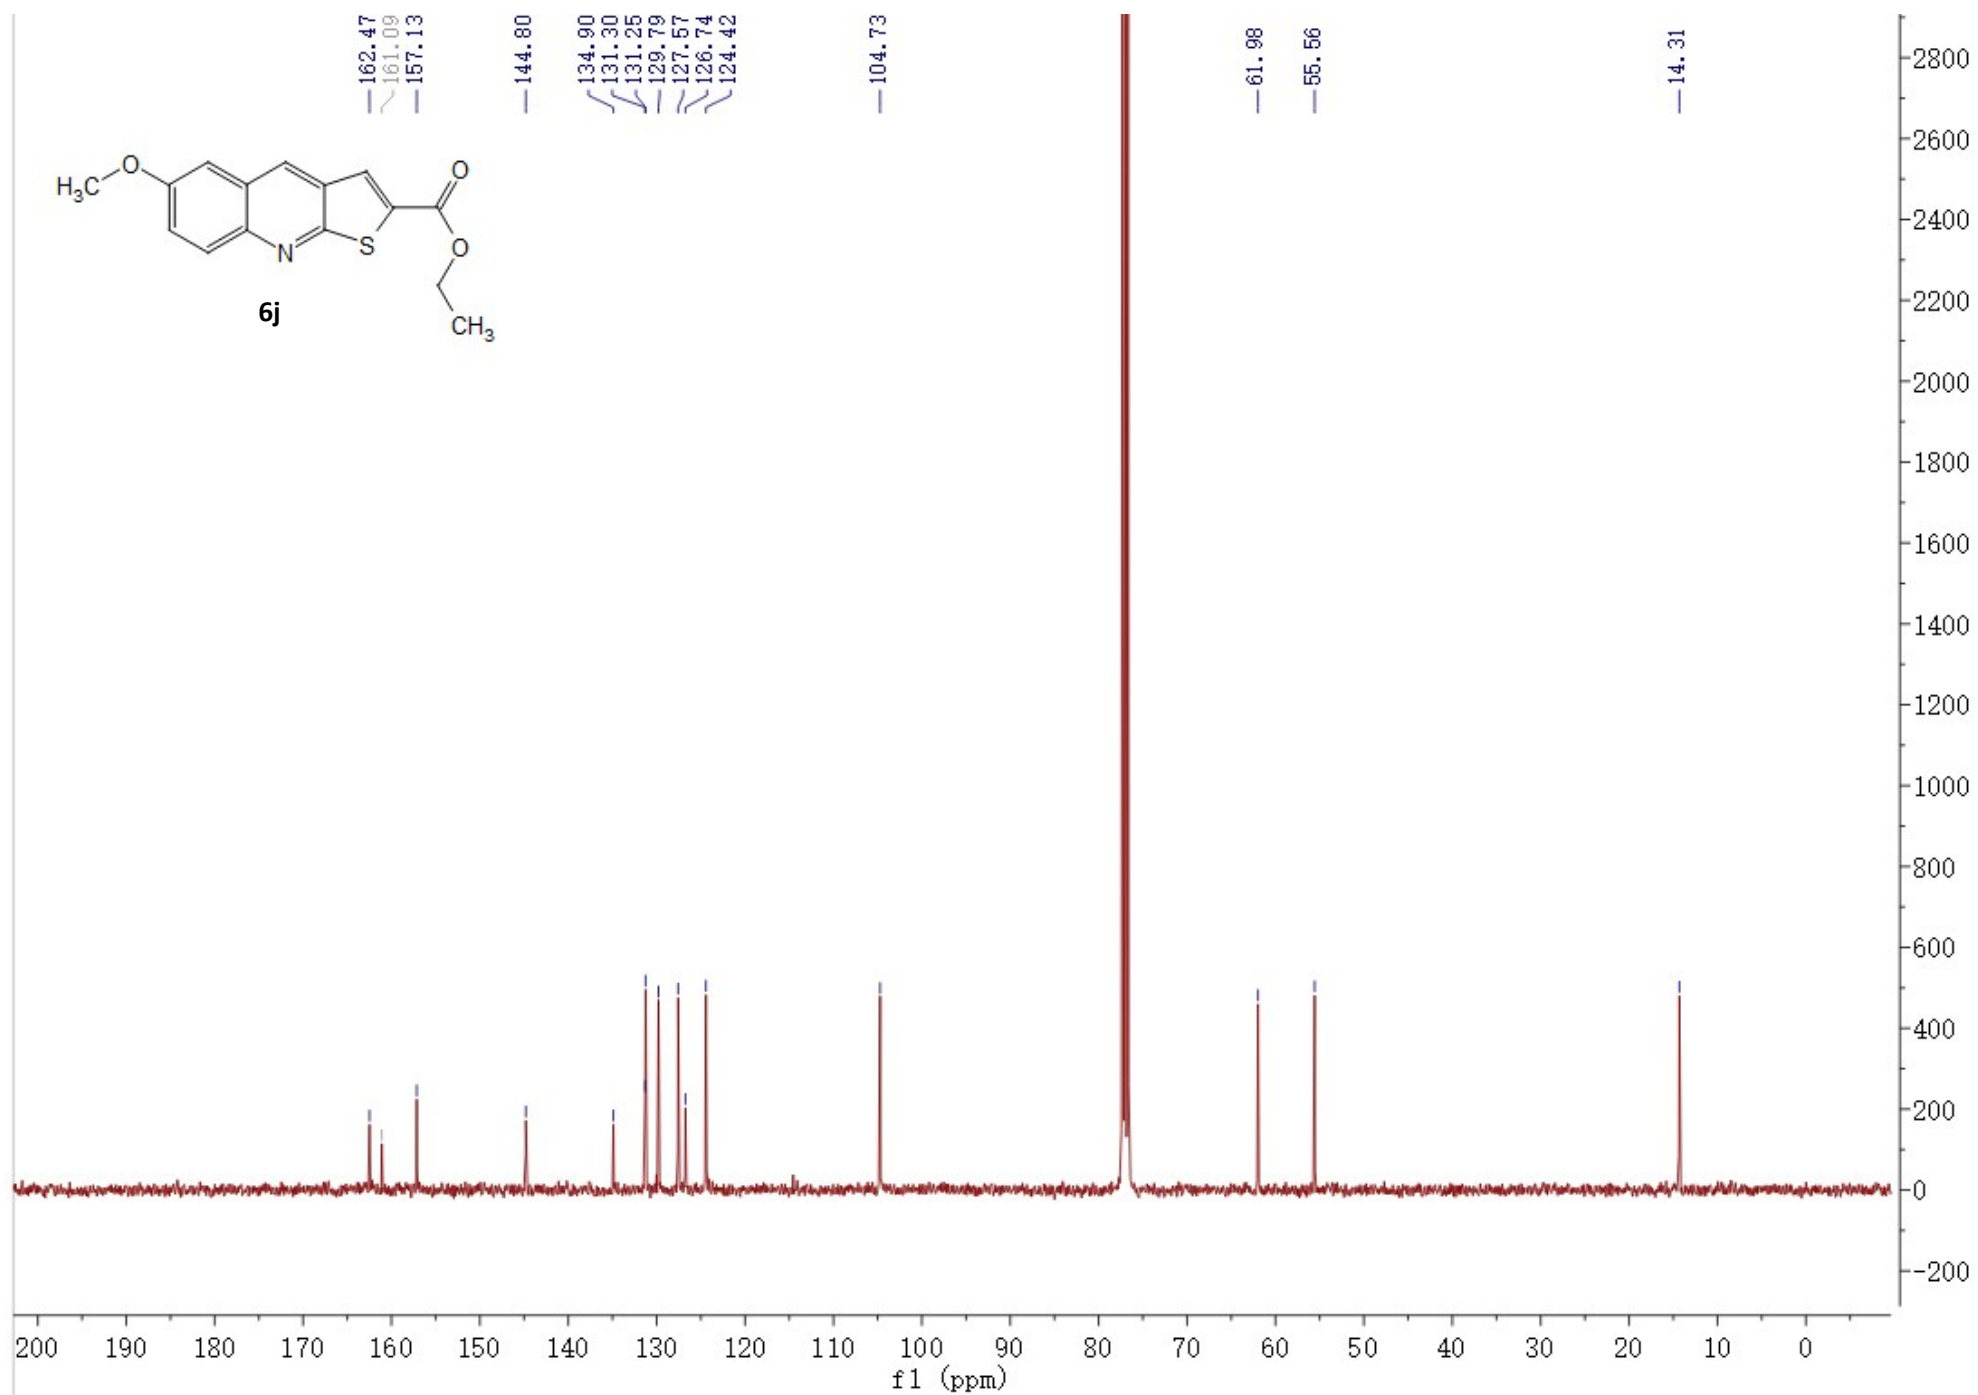

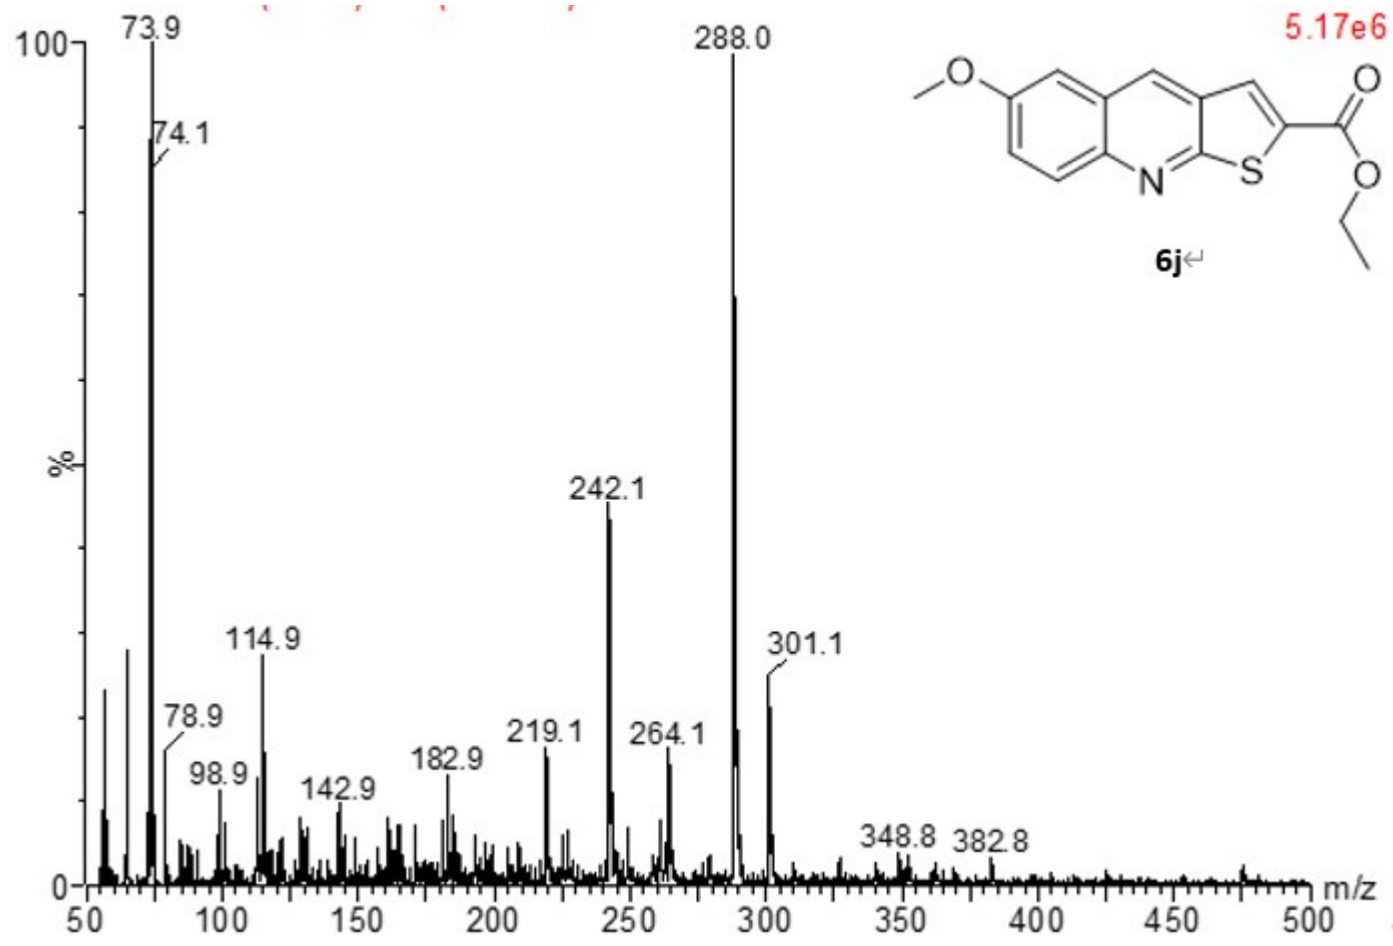

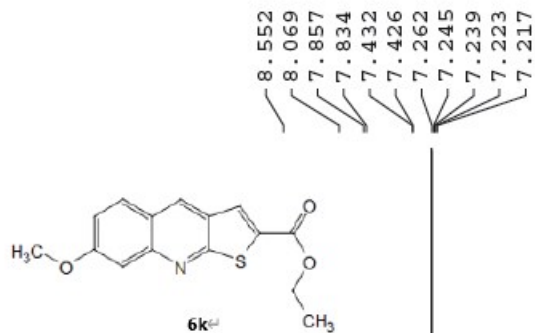

8.552  
8.069  
7.857  
7.834  
7.432  
7.426  
7.262  
7.245  
7.239  
7.223  
7.217

4.473  
4.455  
4.438  
4.420  
3.994

1.617  
1.601  
1.583  
1.461  
1.443  
1.425

0.008  
-0.000  
-0.008

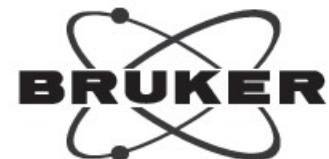

```

NAME      XY-287-3-20200103-HNMR
EXPNO     1
PROCNO    1
Date_     20200103
Time      13.09
INSTRUM   spect
PROBHD    5 mm PABBO BB/
PULPROG   zg30
TD         65536
SOLVENT   CDCl3
NS         8
DS         0
SWH       8012.820 Hz
FIDRES    0.122266 Hz
AQ         4.0894966 sec
RG         203
DW         62.400 usec
DE         6.50 usec
TE         298.1 K
D1         1.00000000 sec
TD0        1
  
```

```

===== CHANNEL f1 =====
SFO1     400.1424710 MHz
NUC1      1H
P1        13.35 usec
SI        65536
SF        400.1400089 MHz
WDW       EM
SSB       0
LB        0.30 Hz
GB        0
PC        1.00
  
```

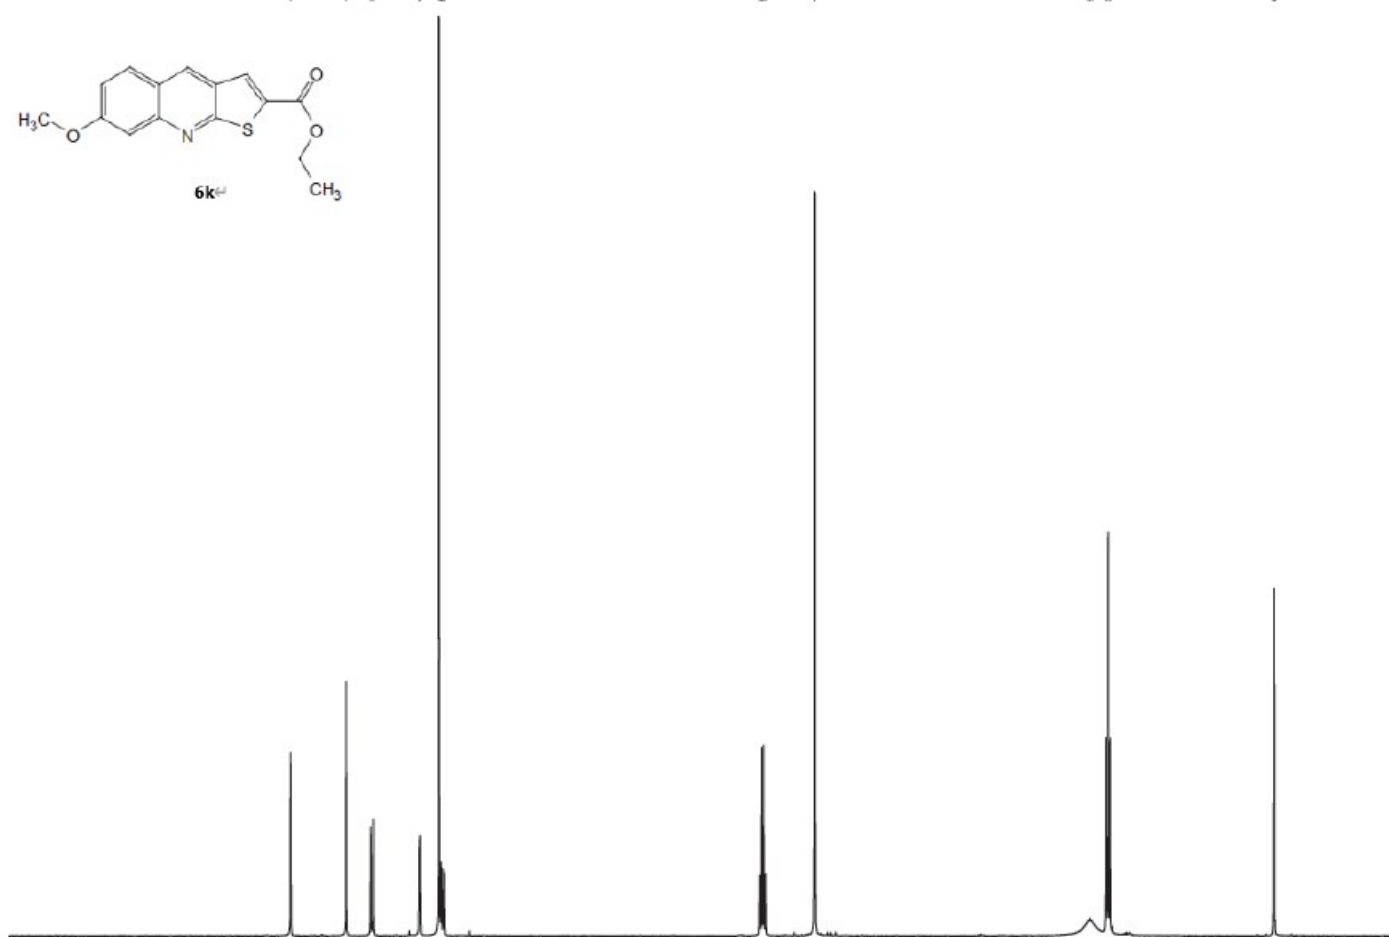

10 9 8 7 6 5 4 3 2 1 0 ppm

0.982  
0.926  
1.000  
0.987  
0.951

1.971  
2.997

3.183

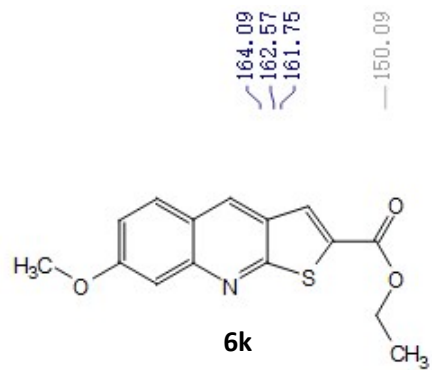

164.09  
162.57  
161.75

150.09

133.05  
132.64  
129.70  
129.39  
128.09  
121.46  
120.15

105.66

61.90

55.65

14.33

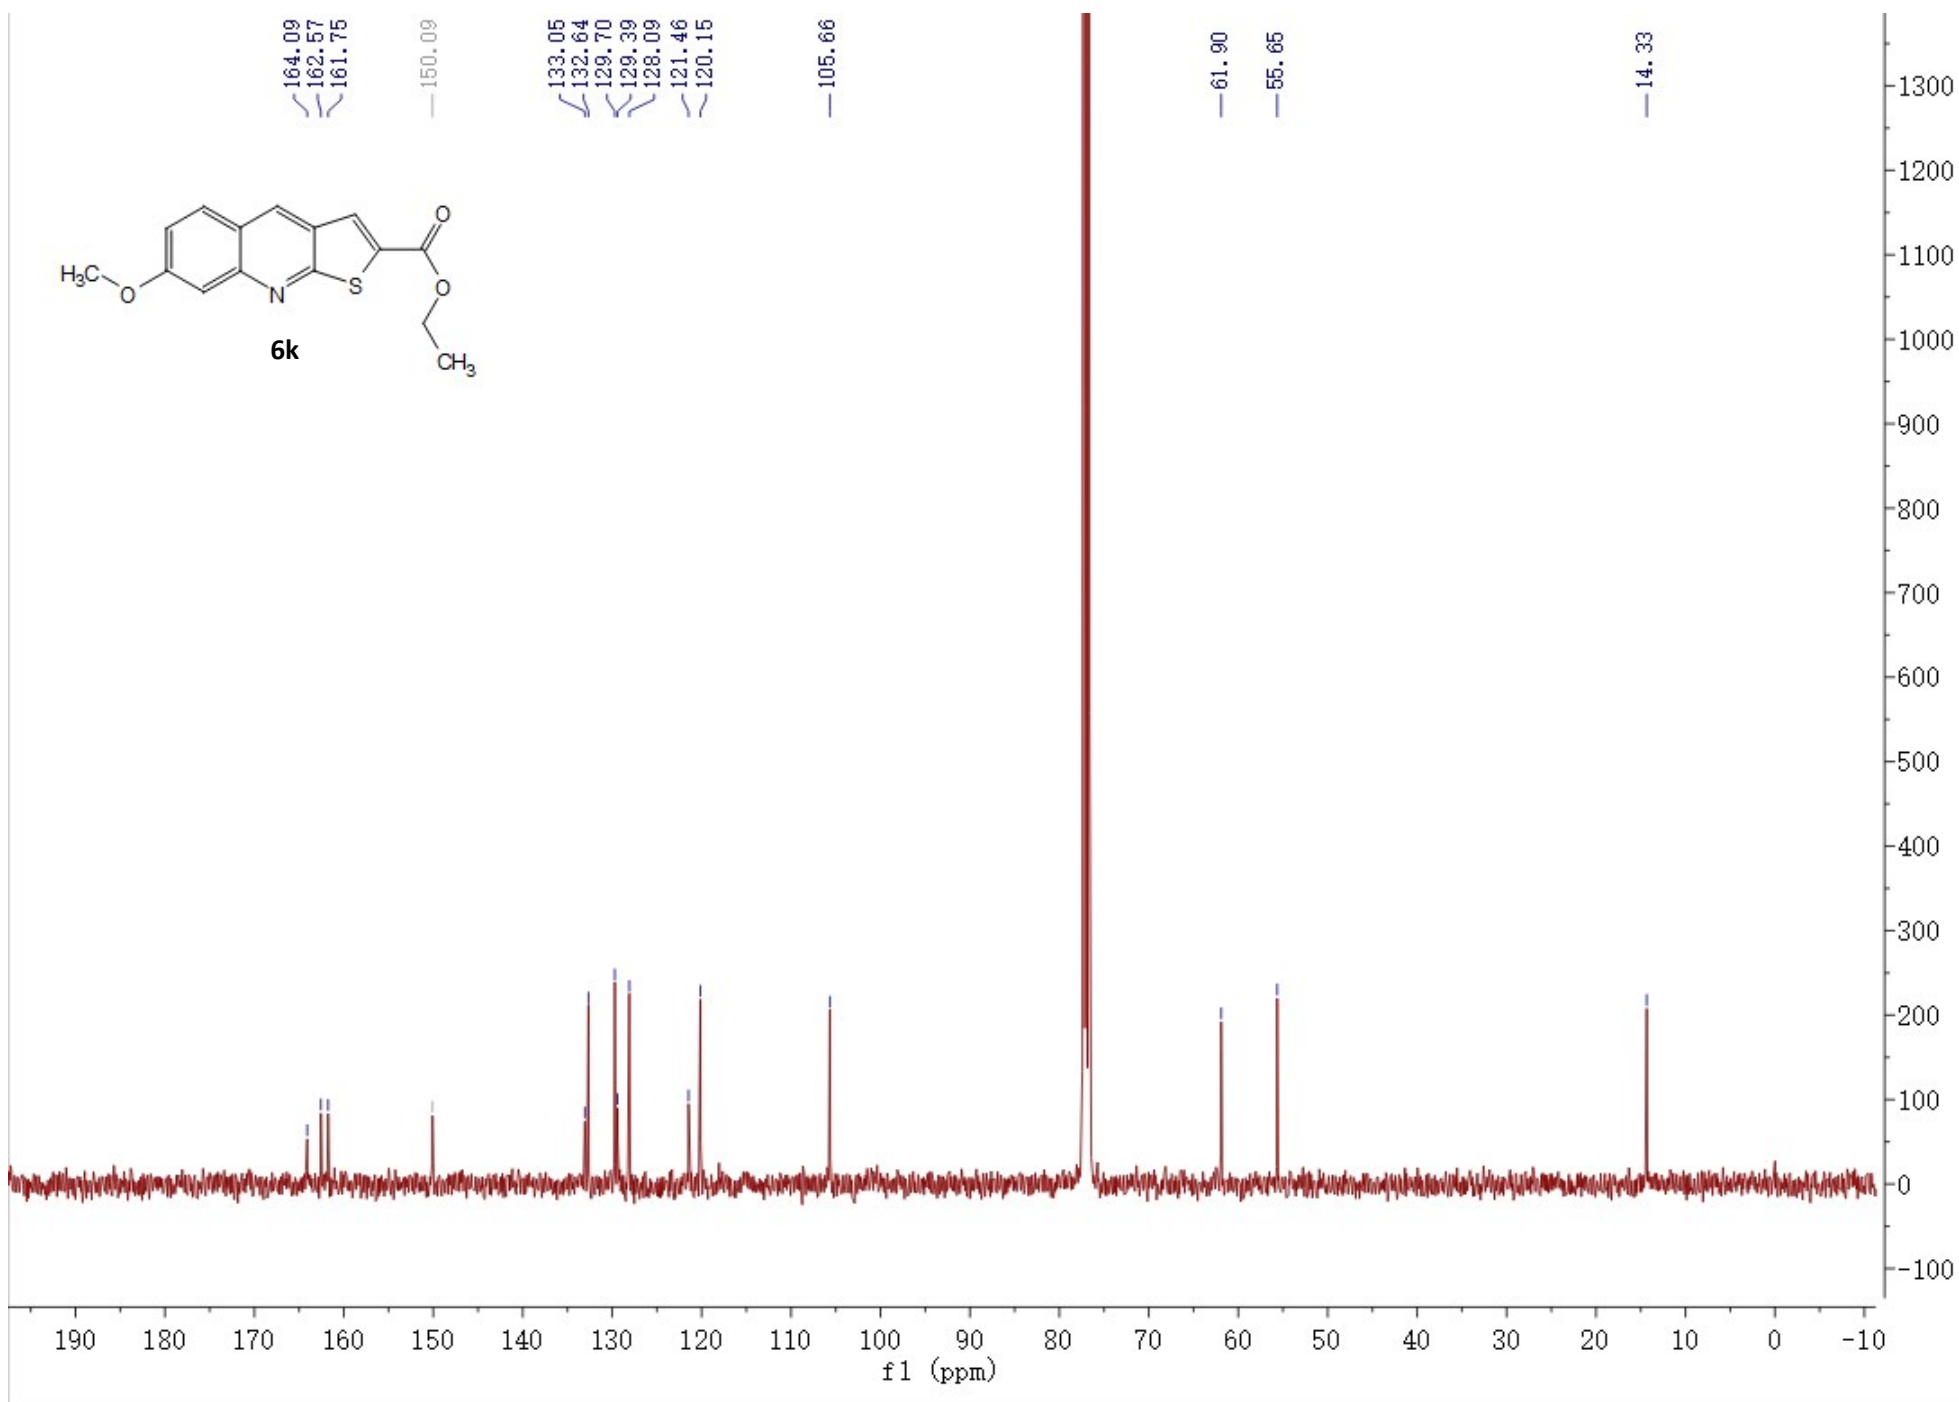

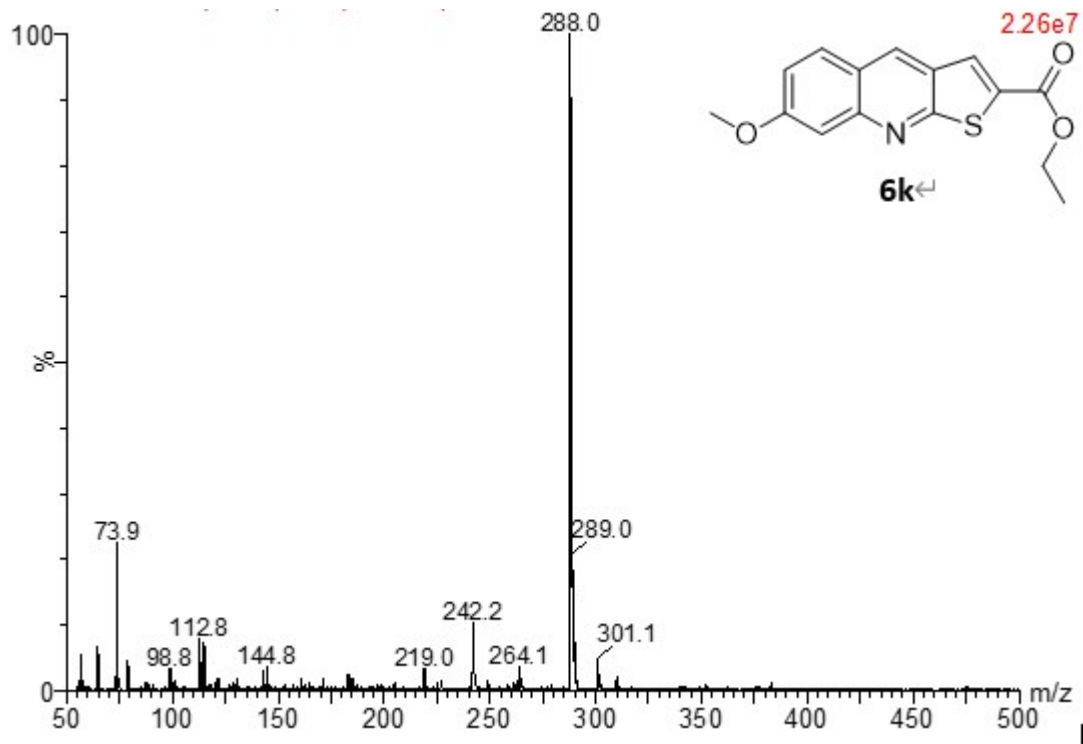



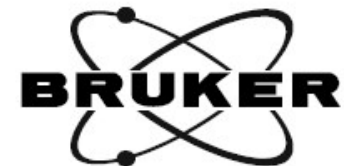

NAME XY-287-1-20200102-HNMR  
EXPNO 1  
PROCNO 1  
Date\_ 20200102  
Time\_ 11.55  
INSTRUM spect  
PROBHD 5 mm PABBO BB/  
PULPROG zg30  
TD 65536  
SOLVENT CDCl3  
NS 8  
DS 0  
SWH 8012.820 Hz  
FIDRES 0.122266 Hz  
AQ 4.0894966 sec  
RG 203  
DW 62.400 usec  
DE 6.50 usec  
TE 298.0 K  
D1 1.00000000 sec  
TD0 1

=====  
CHANNEL f1  
SFO1 400.1424710 MHz  
NUC1 1H  
P1 13.35 usec  
SI 65536  
SF 400.1400088 MHz  
WDW EM  
SSB 0  
LB 0.30 Hz  
GB 0  
PC 1.00

8.643  
8.096  
7.579  
7.576  
7.558  
7.556  
7.510  
7.491  
7.471  
7.262  
7.144  
7.142  
7.126

4.481  
4.463  
4.445  
4.427  
4.153

1.603  
1.464  
1.446  
1.428  
1.254

0.008  
-0.000  
-0.008

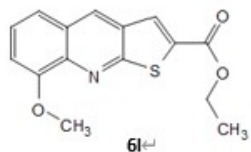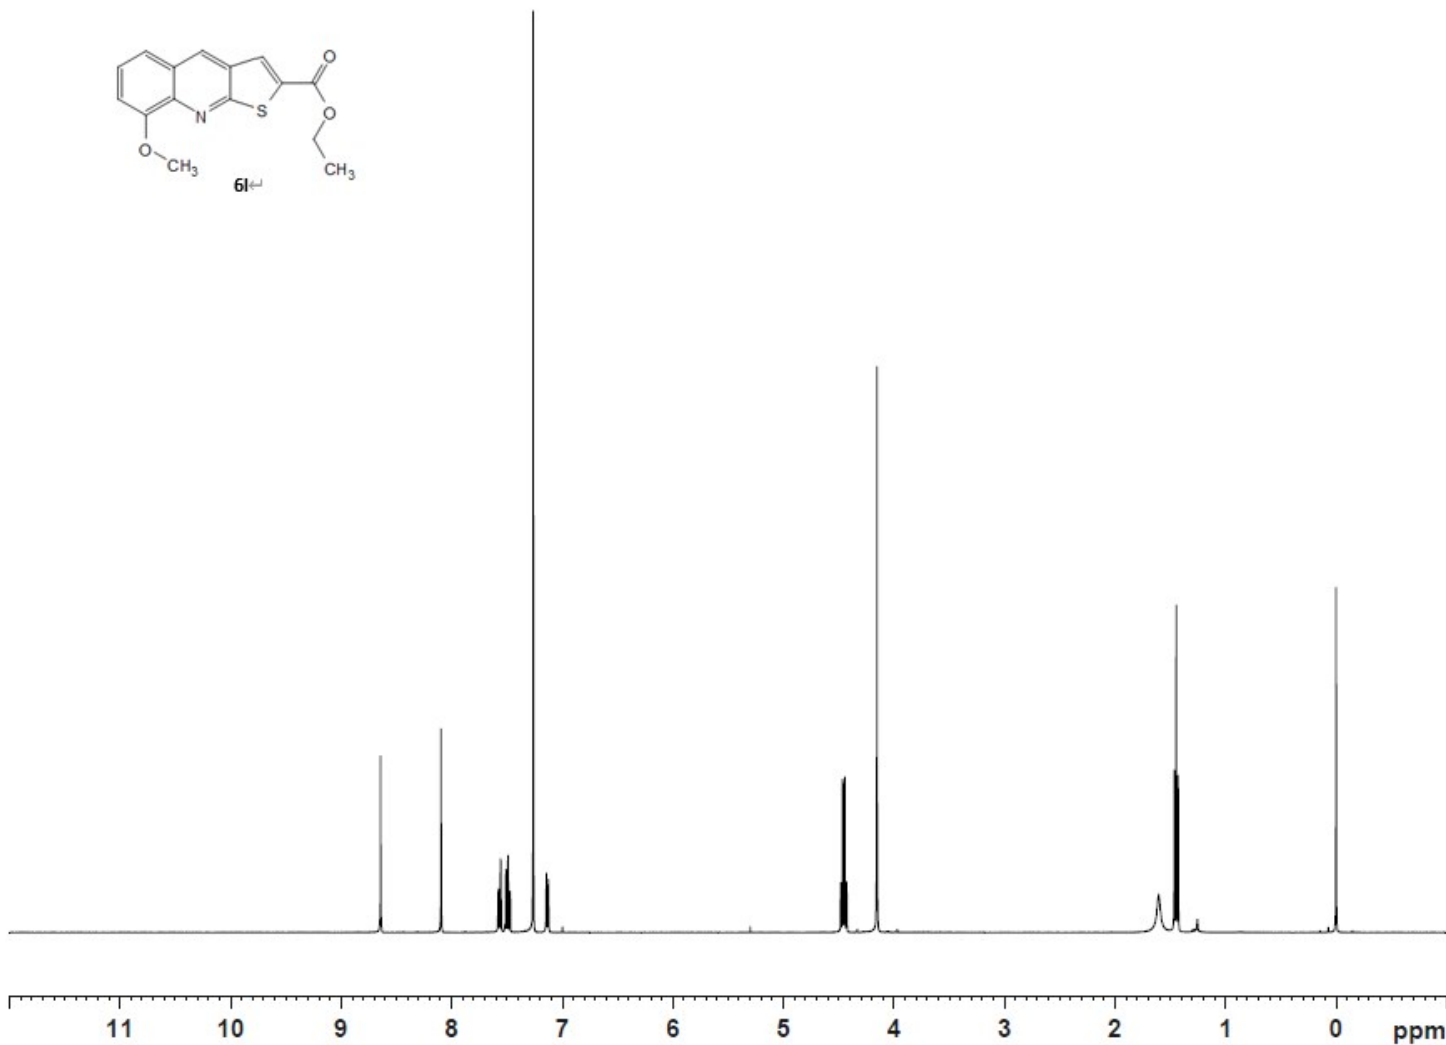

0.941  
0.938  
1.000  
1.018  
0.948

1.913  
2.875

2.907

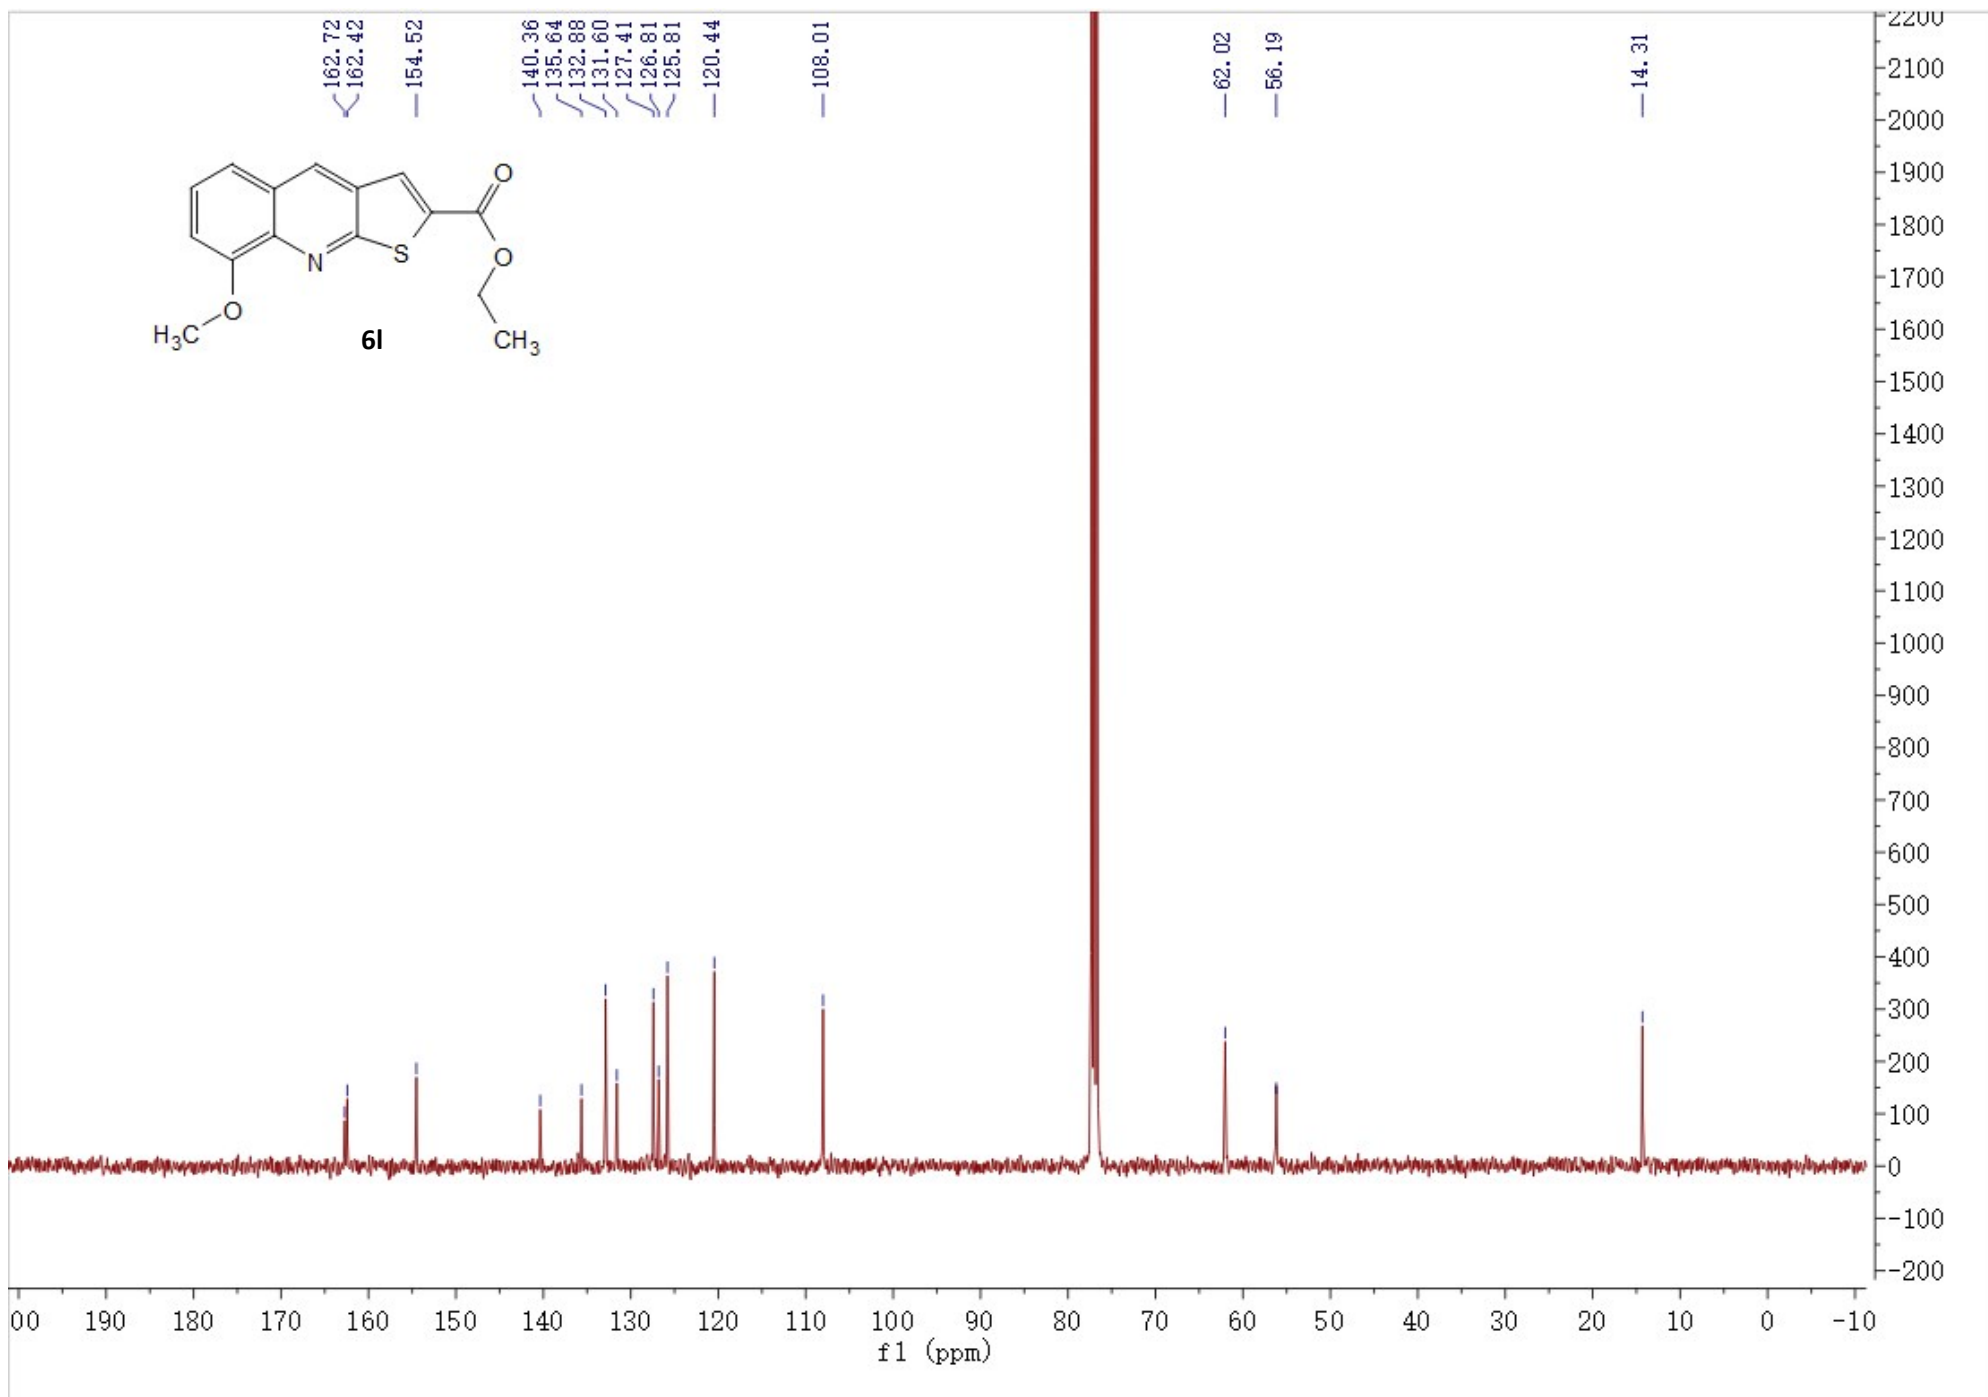

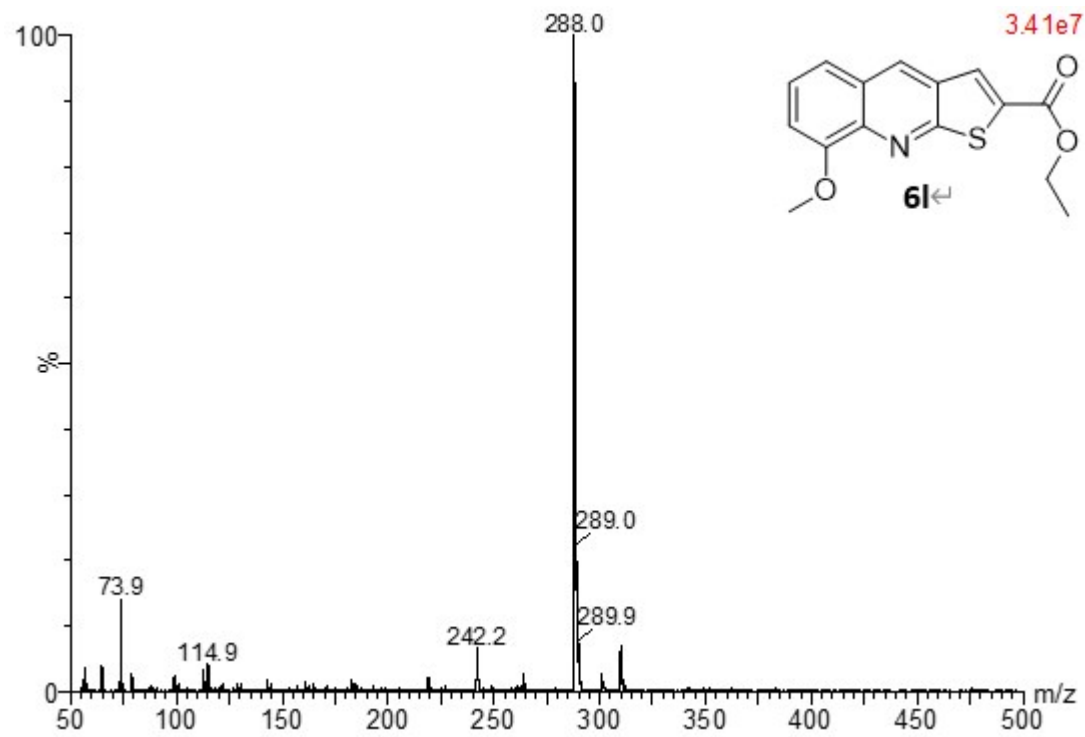

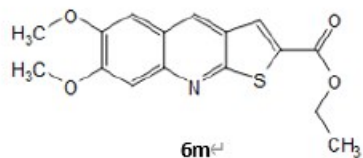

8.461  
8.053  
7.434  
7.268  
7.148

4.471  
4.453  
4.436  
4.418  
4.078  
4.052

1.462  
1.444  
1.427  
1.301  
1.291  
1.283  
1.255  
1.231  
0.880  
0.874  
0.857  
0.835  
0.007  
-0.000  
-0.008

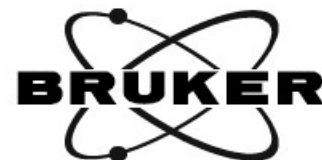

```

NAME      XY-317-20200115-HNMR
EXPNO     1
PROCNO    1
Date_     20200115
Time      10.48
INSTRUM   spect
PROBHD    5 mm PABBO BB-
PULPROG   zg30
TD         32768
SOLVENT   CDC13
NS         8
DS         0
SWH       8223.685 Hz
FIDRES    0.250967 Hz
AQ         1.9923444 sec
RG         203
DW         60.800 usec
DE         6.50 usec
TE         673.2 K
D1         1.00000000 sec
TD0        1
  
```

```

===== CHANNEL f1 =====
NUC1      1H
P1         11.90 usec
PL1        -2.30 dB
PL1W      18.55620956 W
SFO1      400.1424710 MHz
SI         32768
SF         400.1400062 MHz
WDW        EM
SSB         0
LB         0.30 Hz
GB         0
PC         1.00
  
```

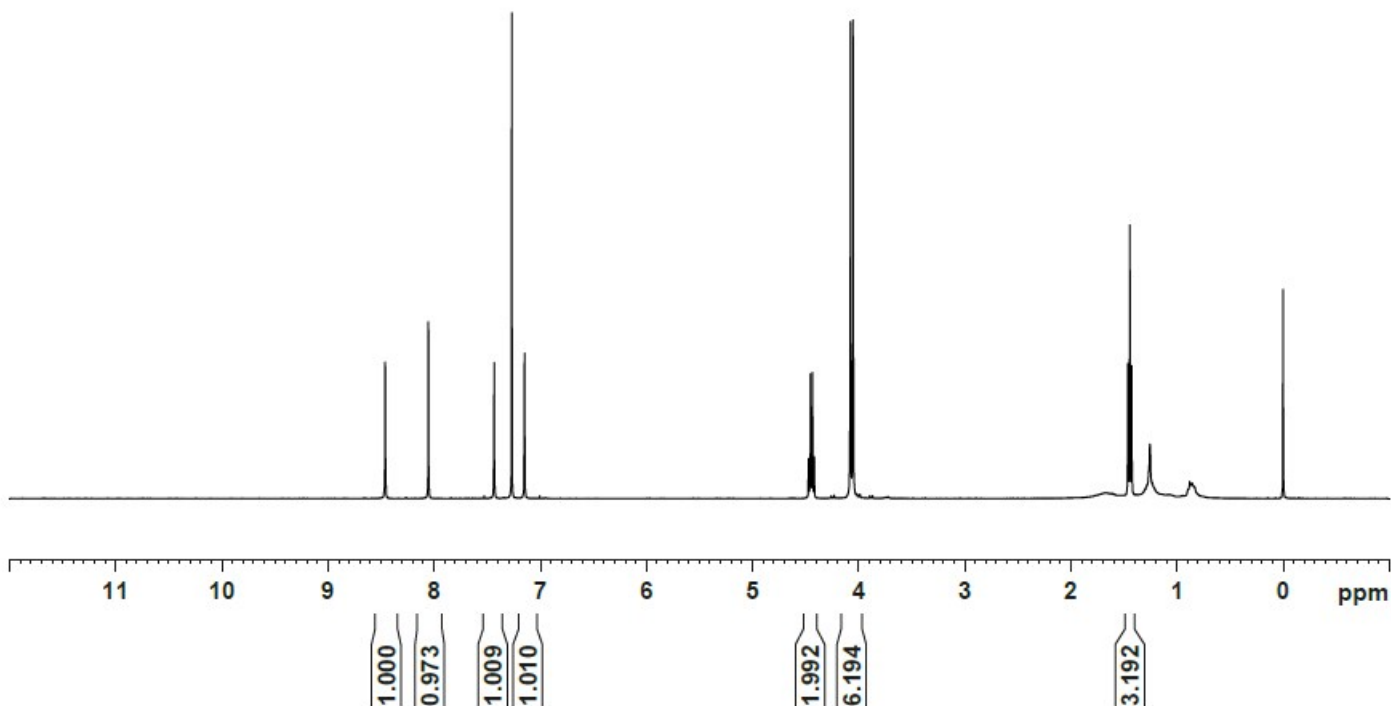

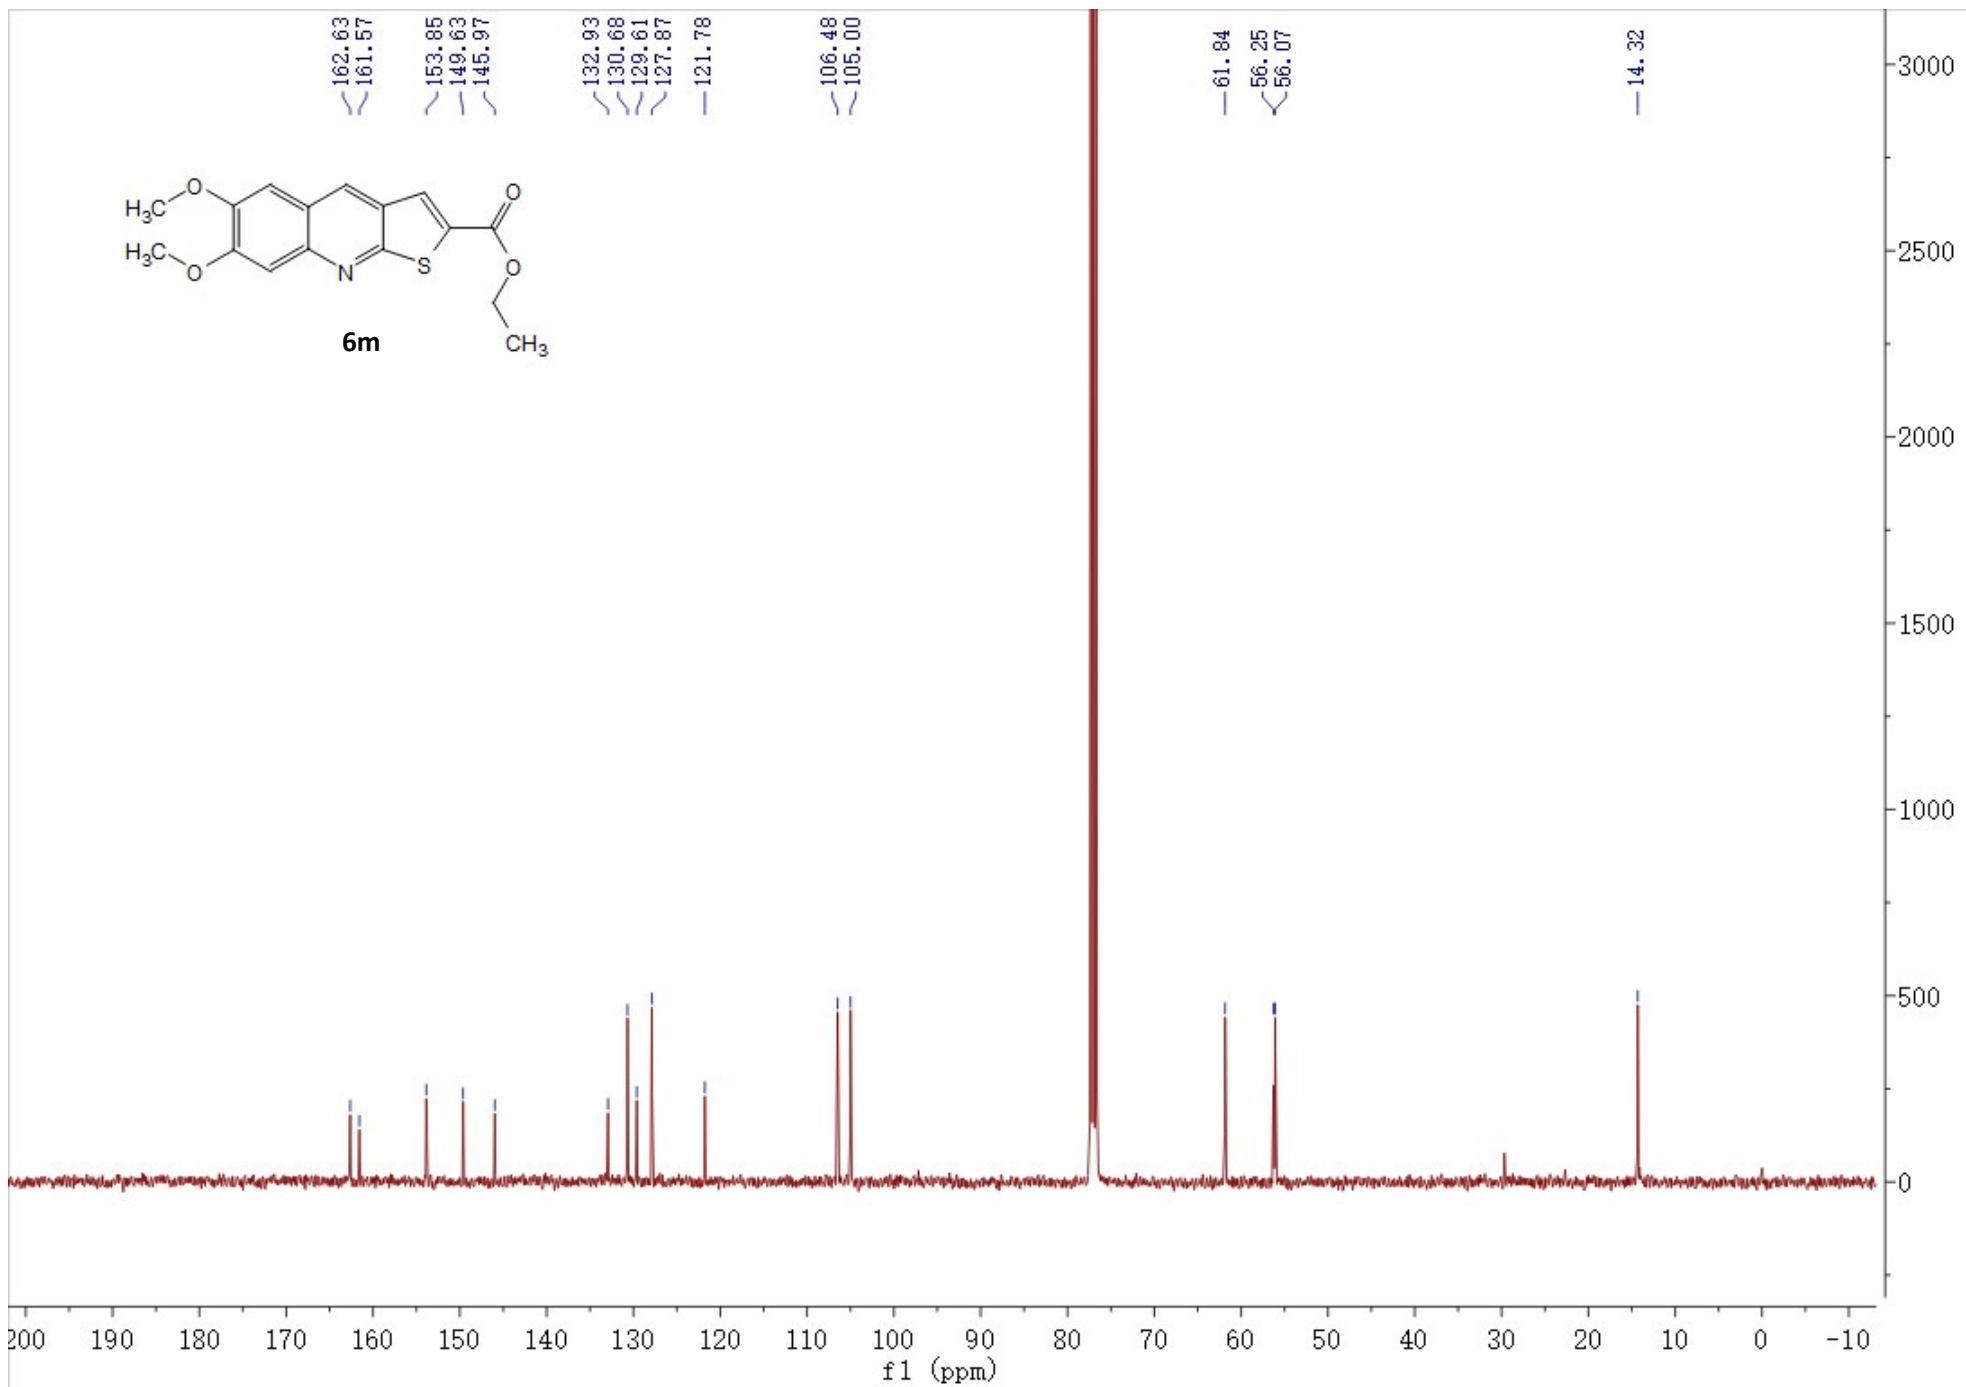

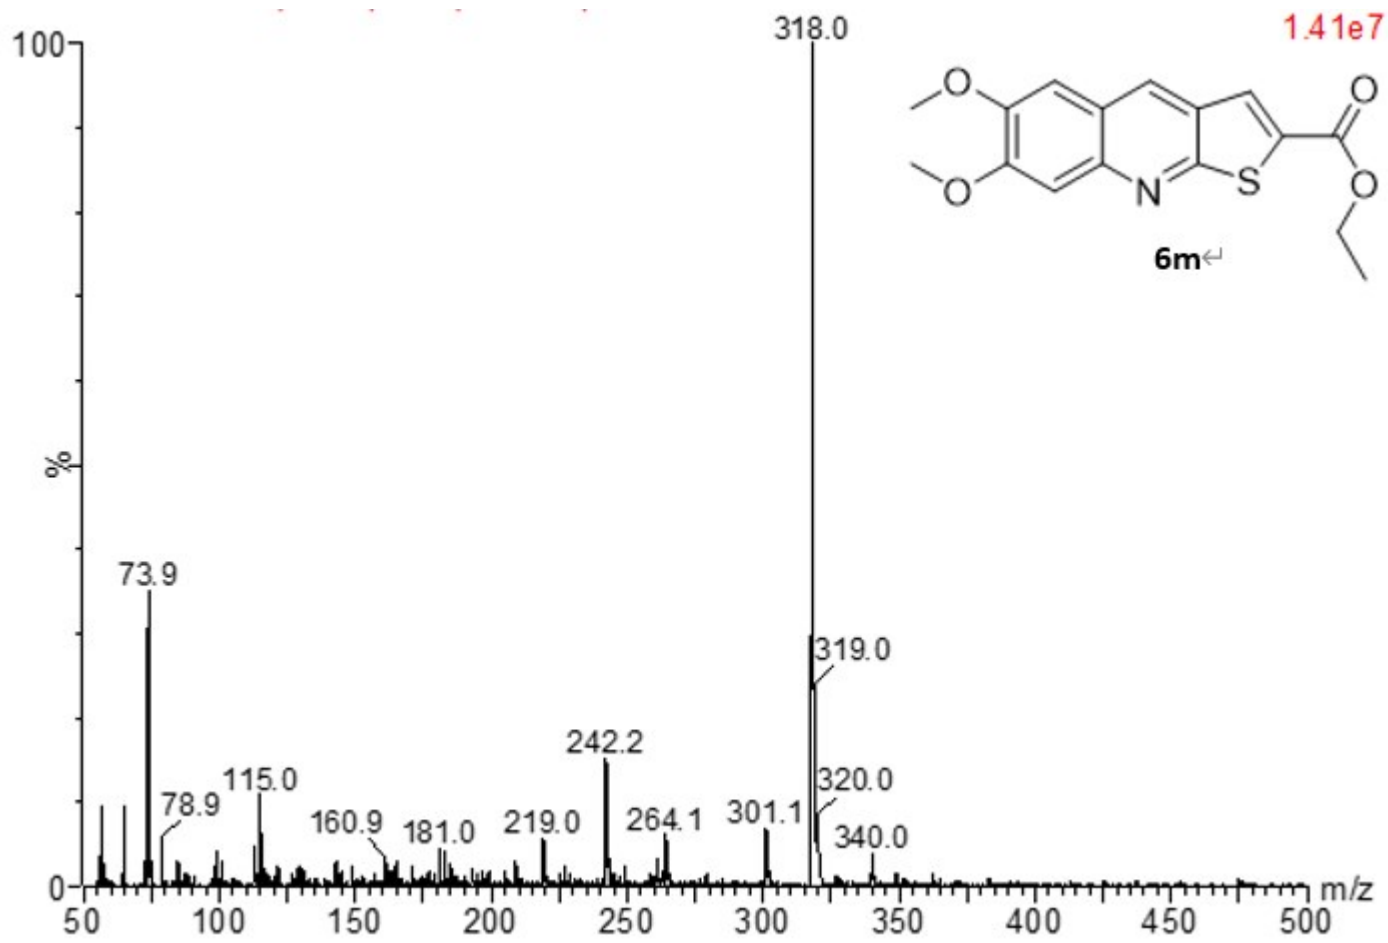

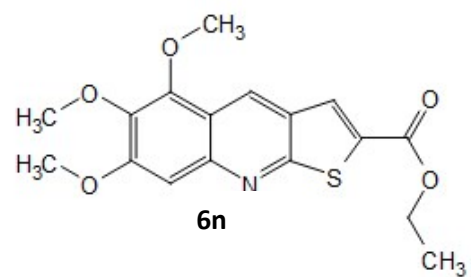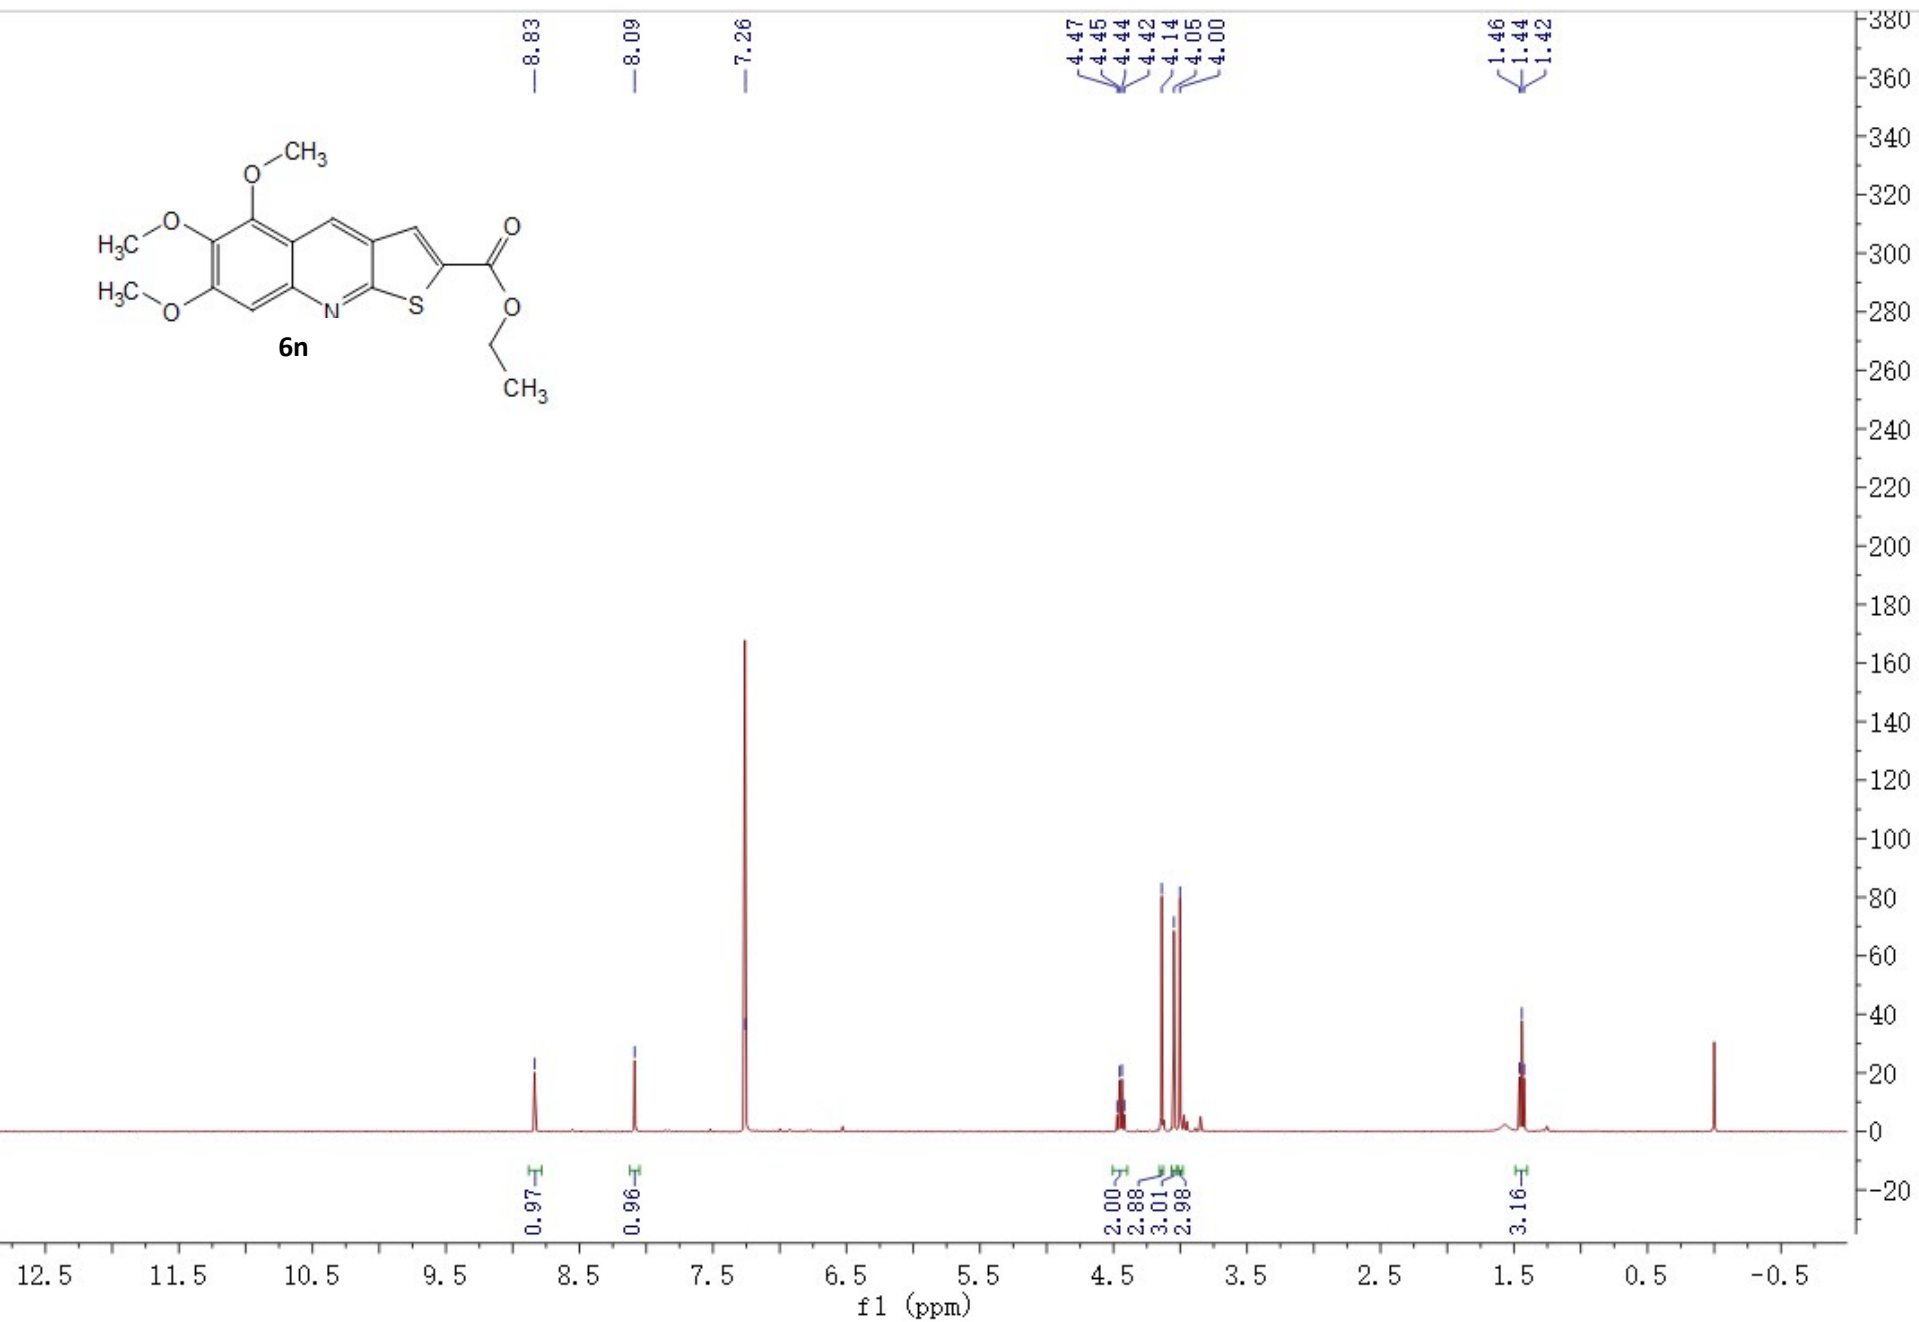

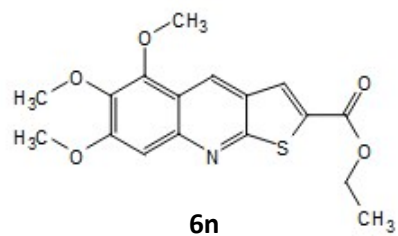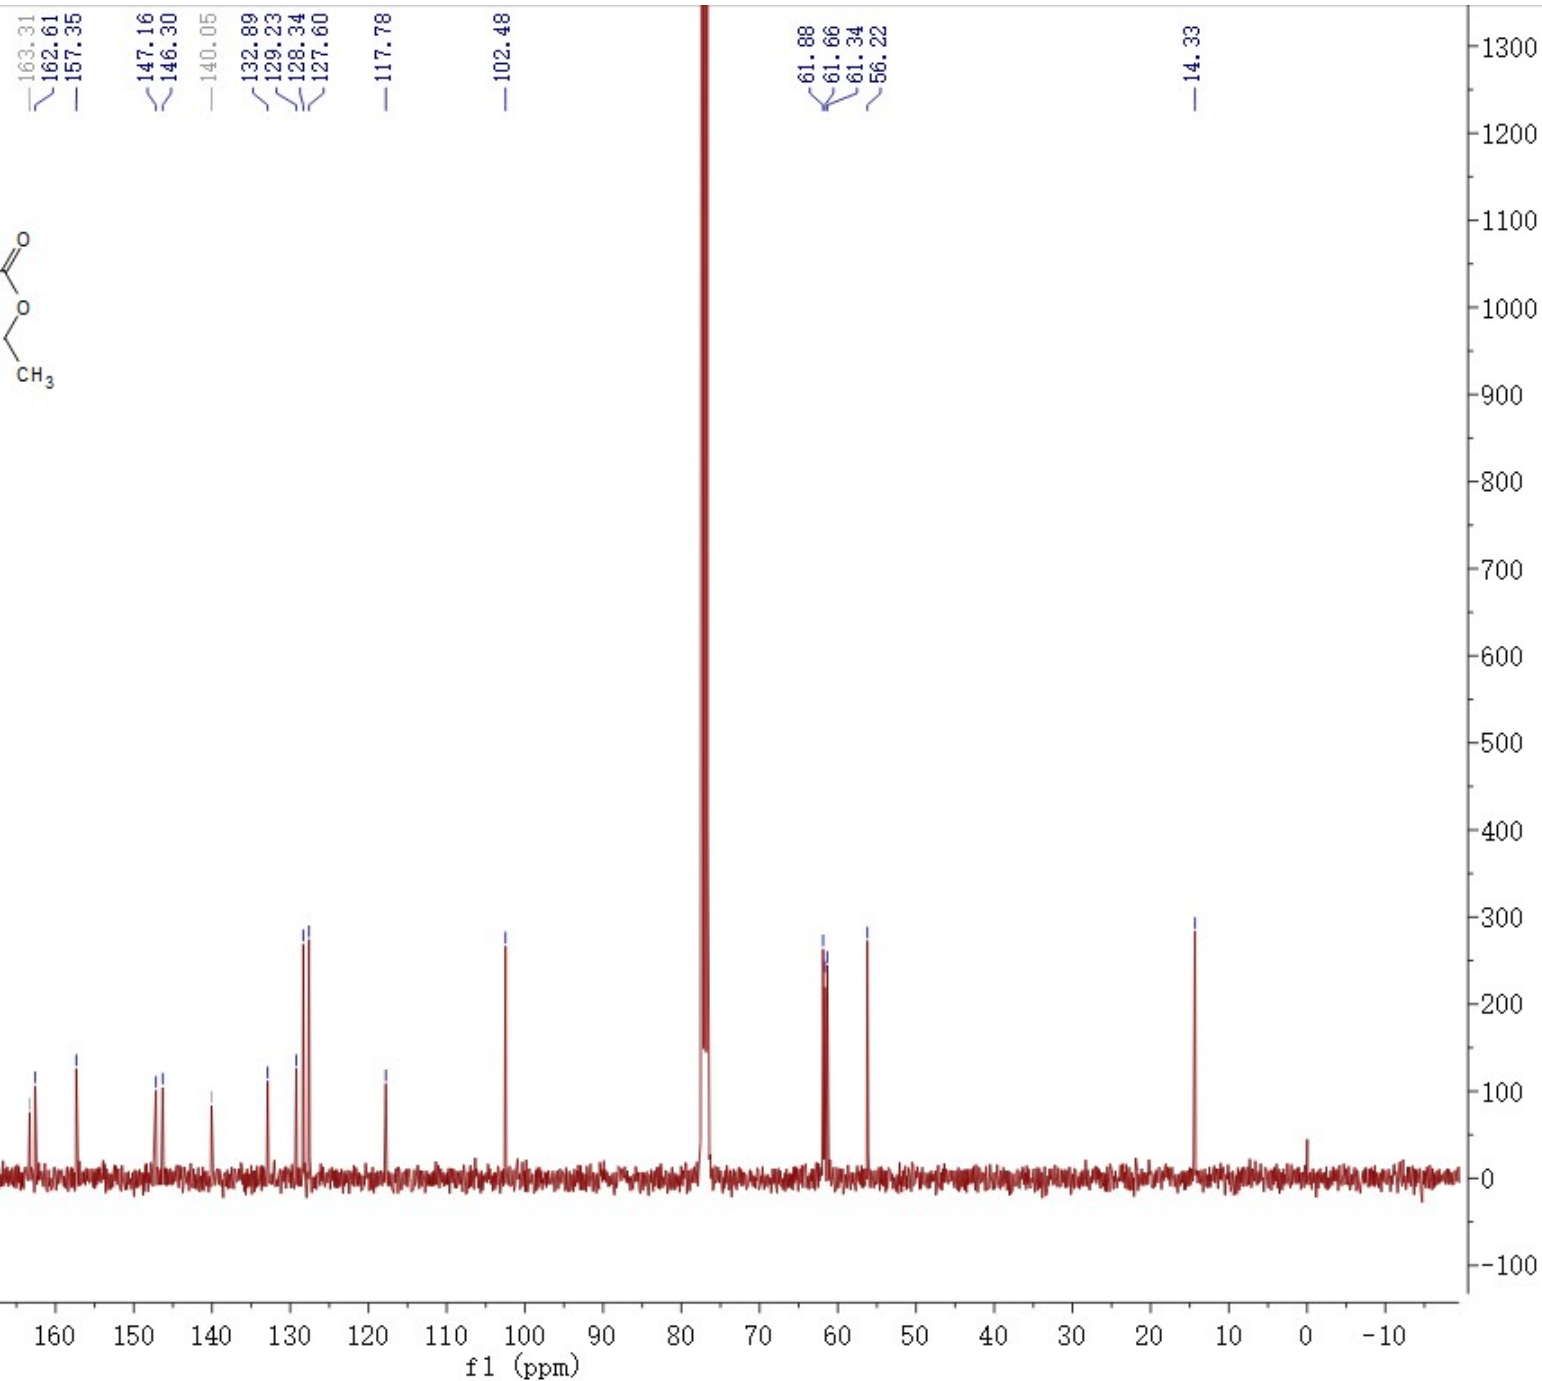



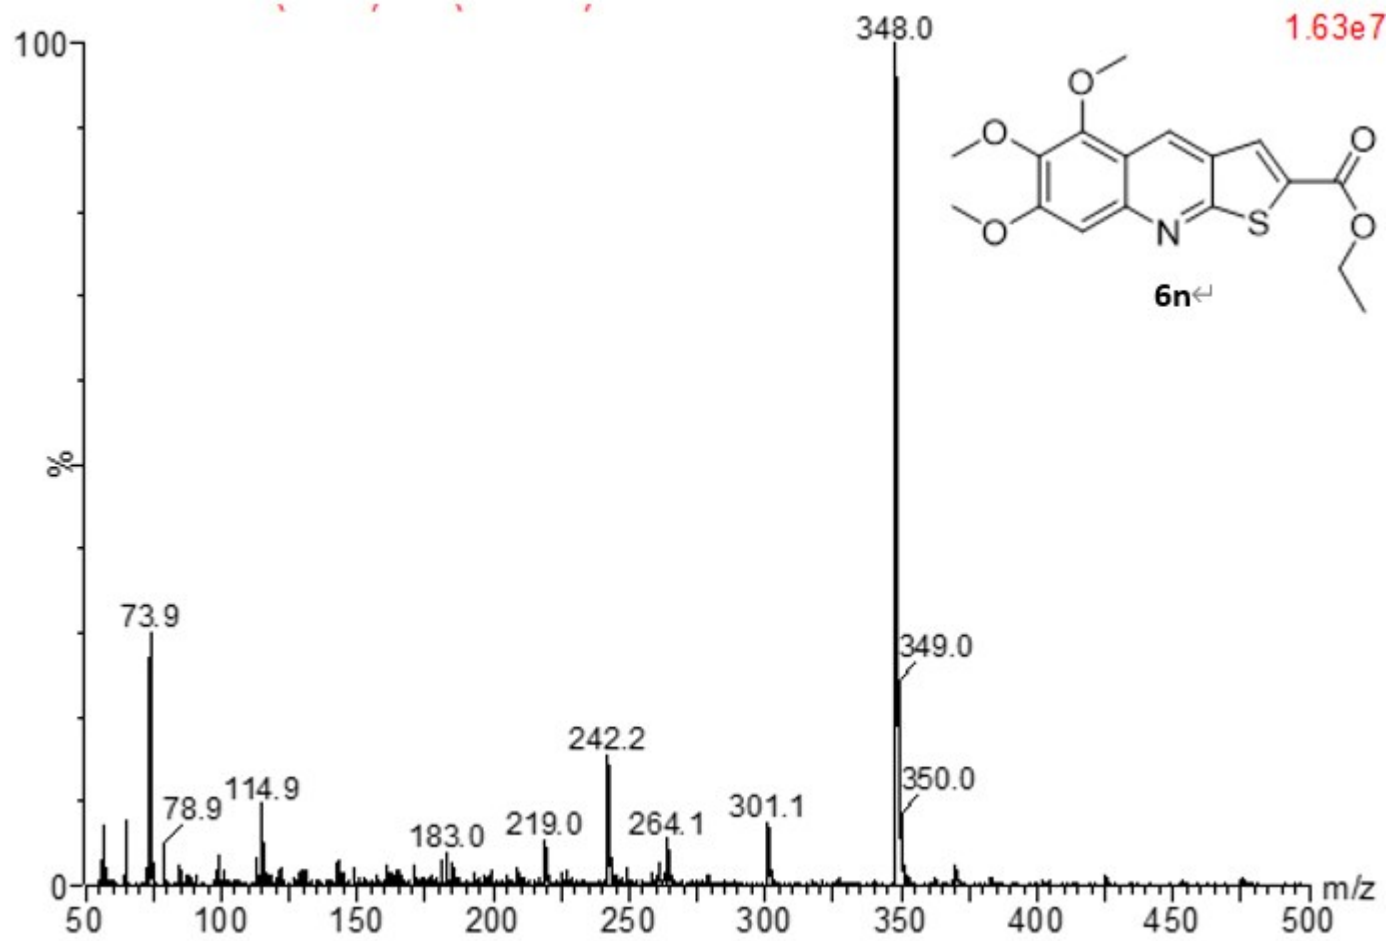

Supplement: d0ra09247a1.pdf [file d0ra09247a1.pdf]
